# Supplementary material for: Ancestral aneuploidy and stable chromosomal duplication resulting in differential genome structure and gene expression control in trypanosomatid parasites
Source: PubMed Central journal article supplement (PMC11067883; doi:10.1101/gr.278550.123), 2024-03

**Supplemental\_Fig\_S1.pdf: Sample-by-sample CCNV Heatmaps in all isolates from all clades.** Each line corresponds to a different chromosome/scaffold and each column to a different isolate. The chromosome copies are represented by a colour scale from dark-blue (low copy number) to dark-red (high copy number), where euploid chromosomes (~1 copy for each haploid genome copy) are in light blue. The dendrogram on top clusters the samples by UPGMA, based on the Manhattan distance of their chromosome copy numbers.

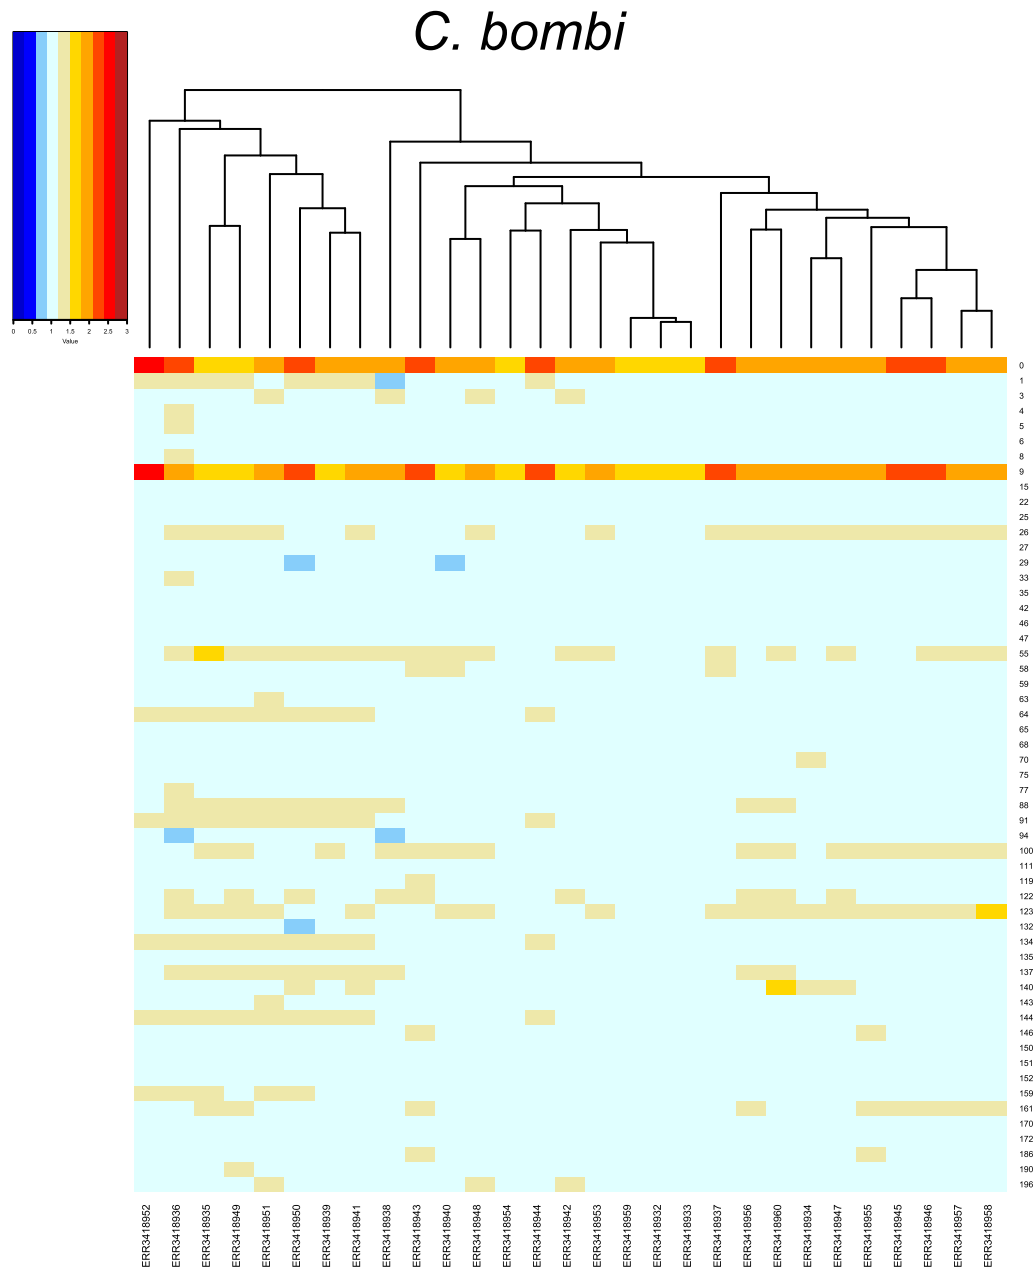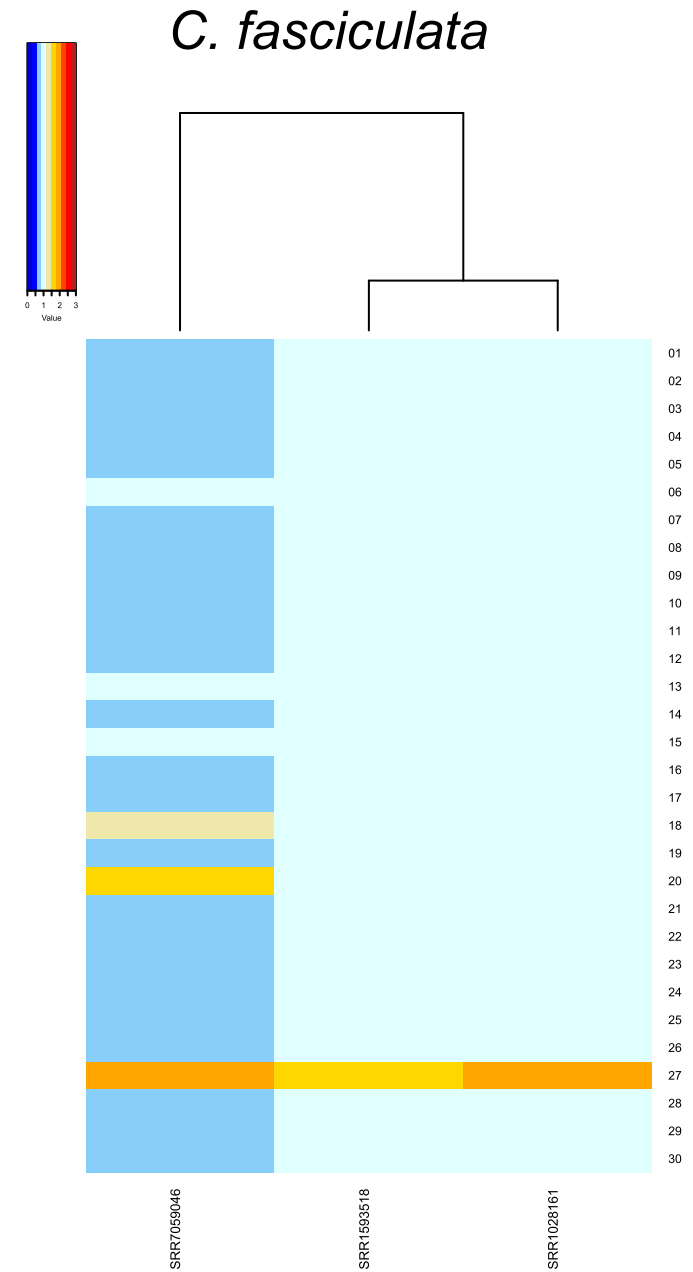

# Endotrypanum

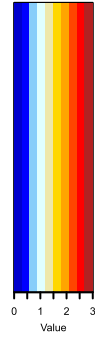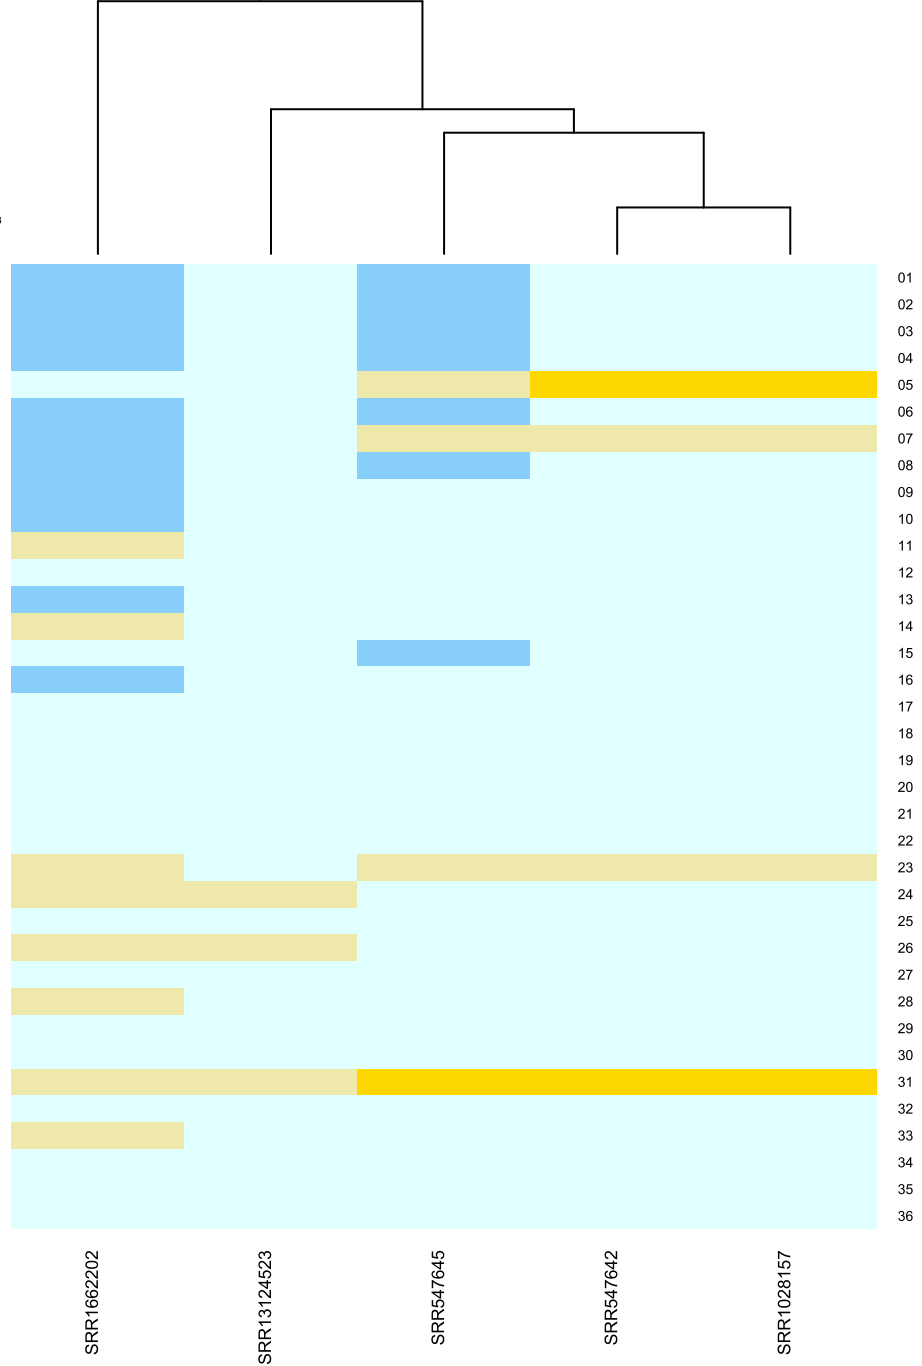

# *L. donovani*

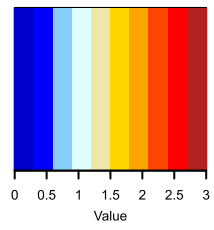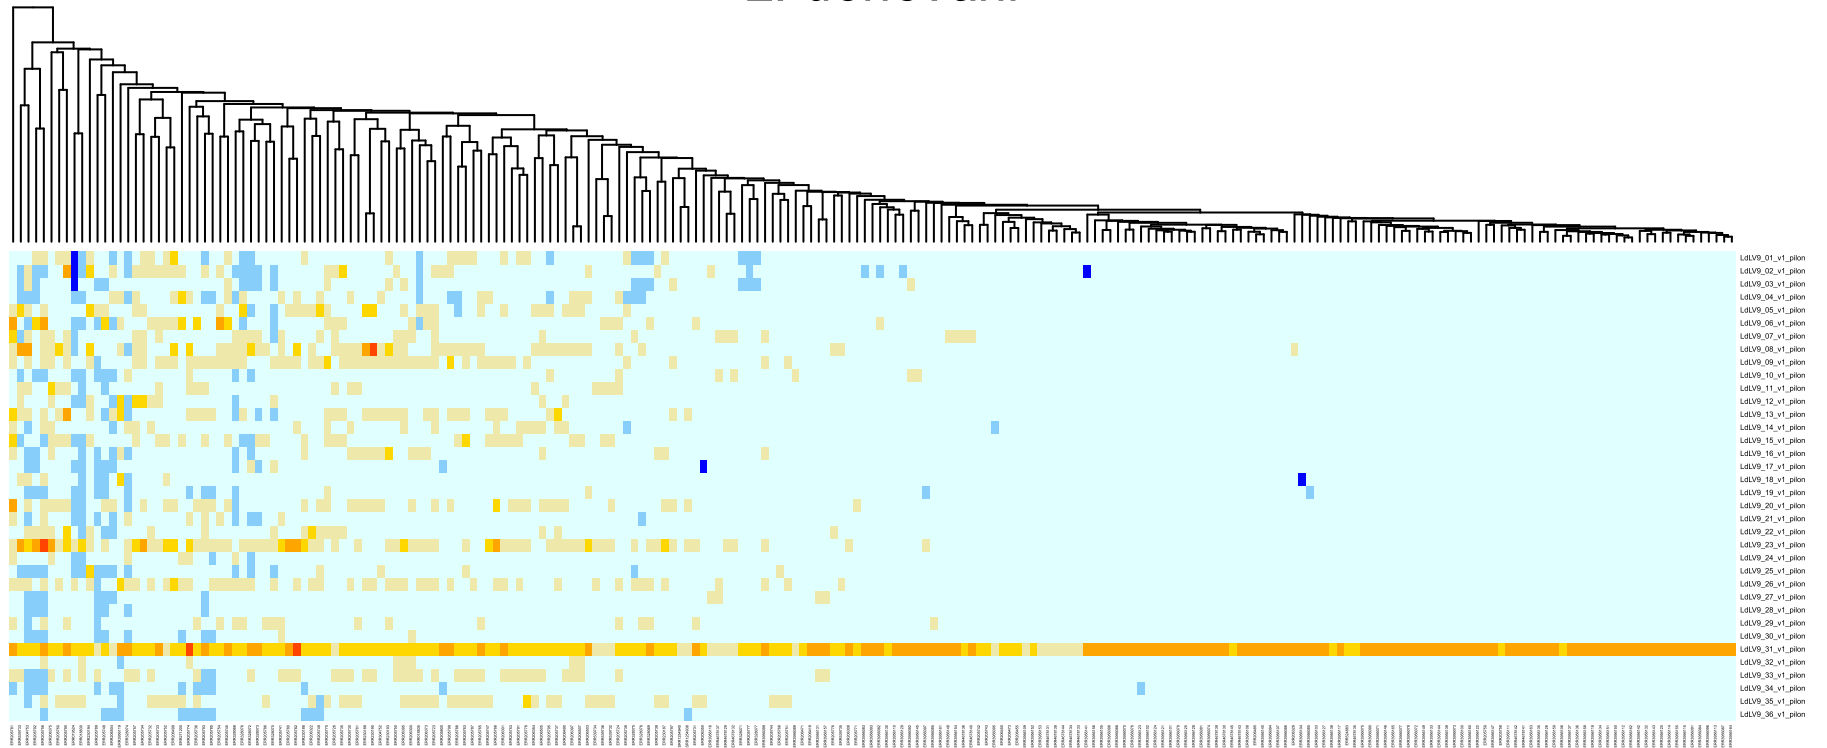

# *L. major*

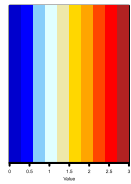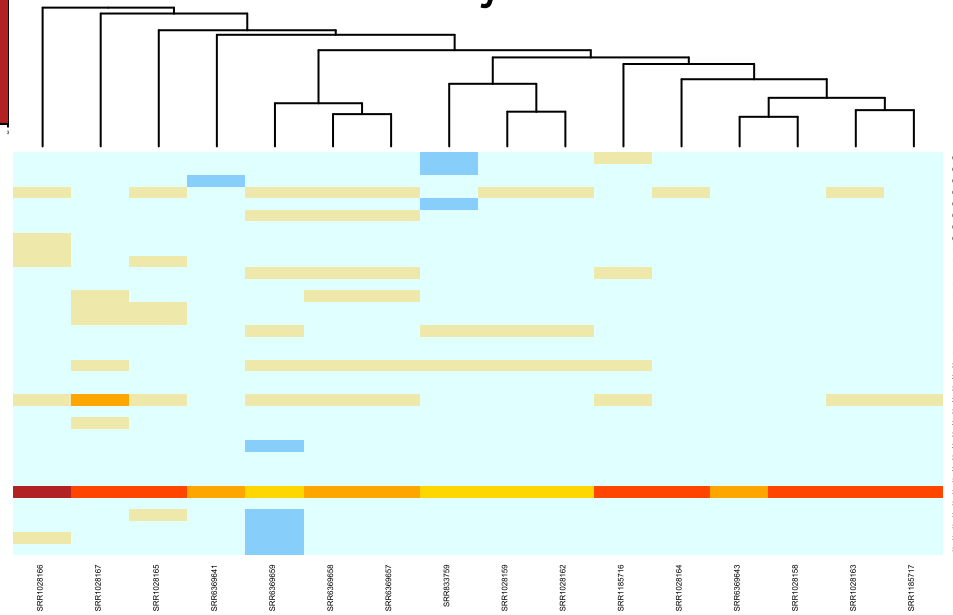

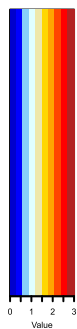

# Leptomonas

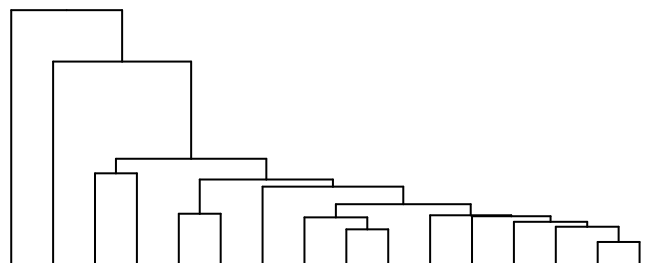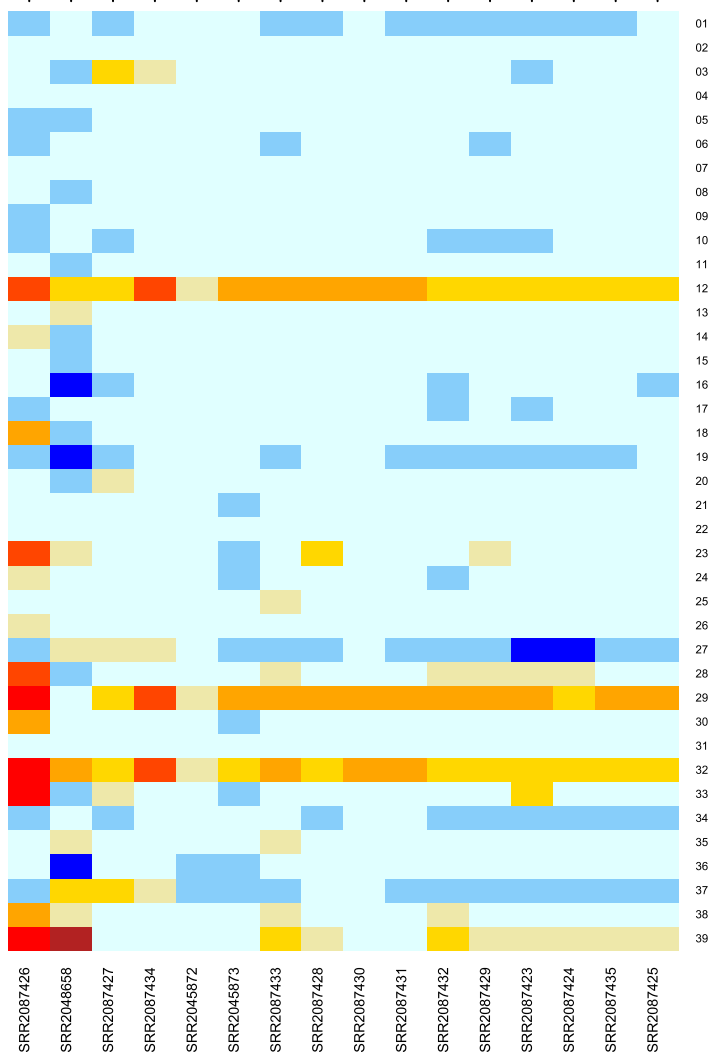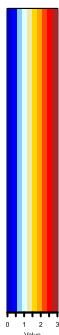

# Paratrypanosoma

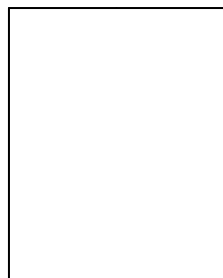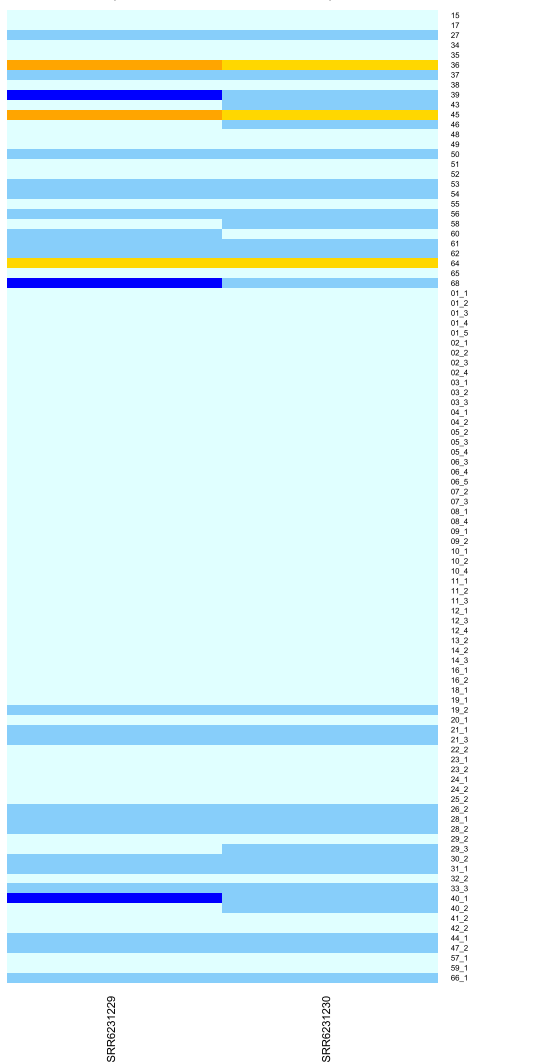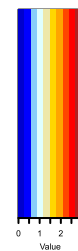

# Porcisia

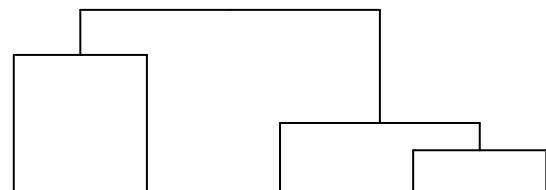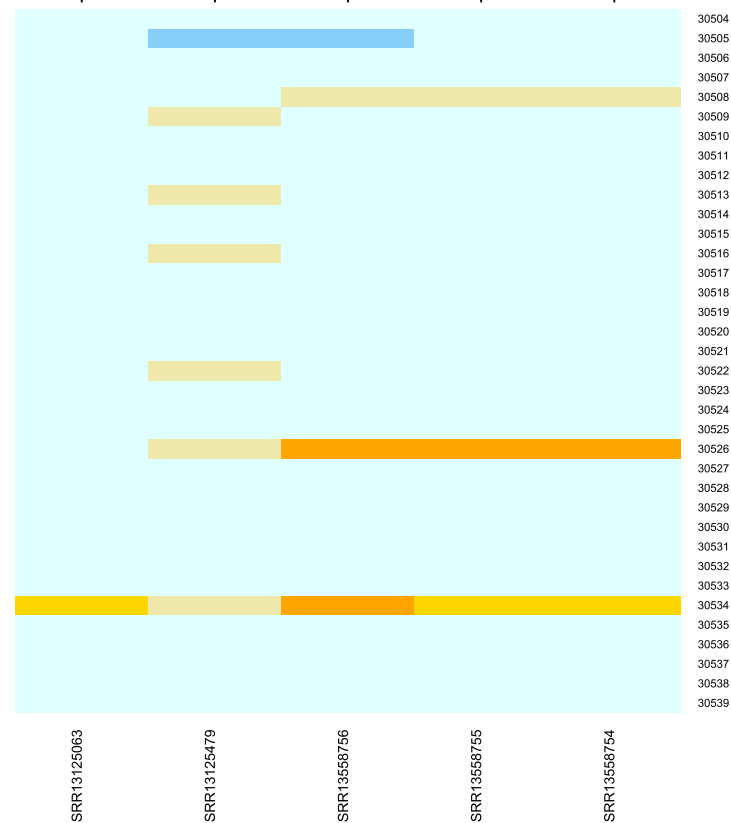

# *T. cruzi*

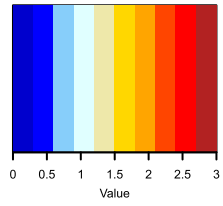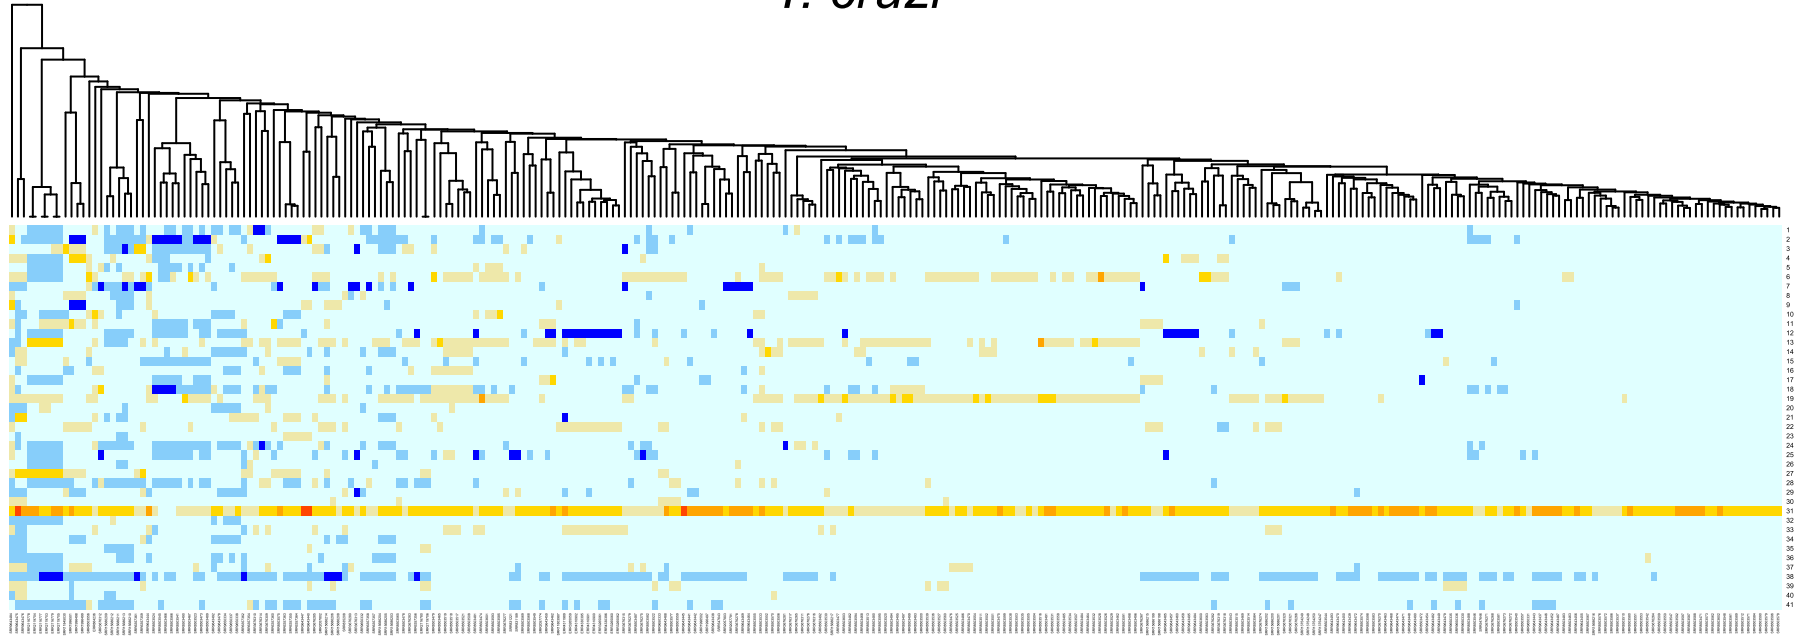

# *T. brucei*

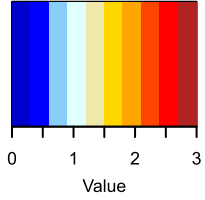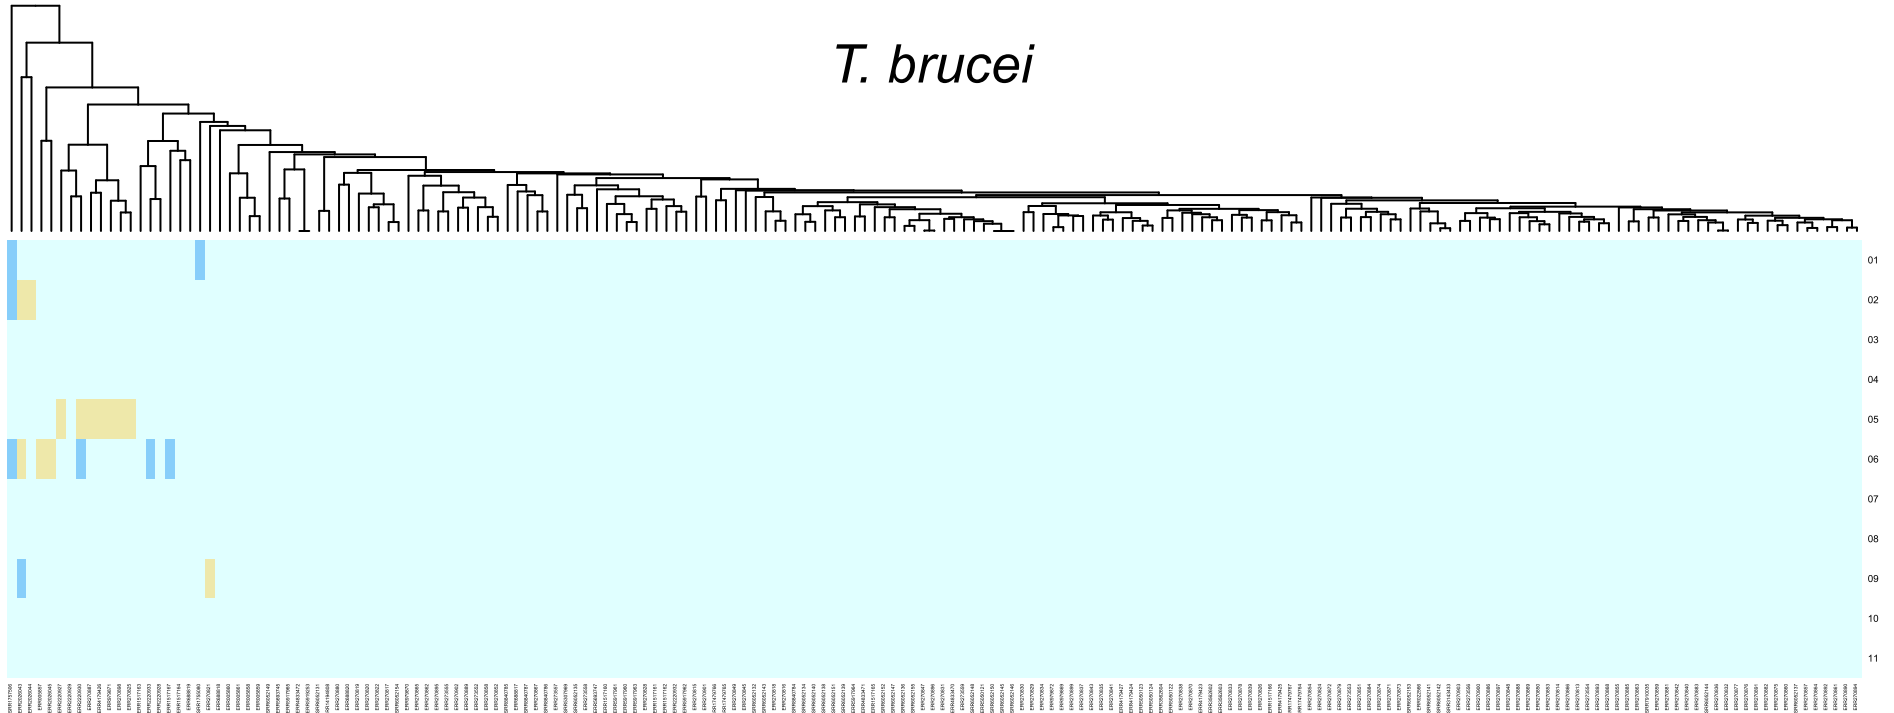

# *T. congolense*

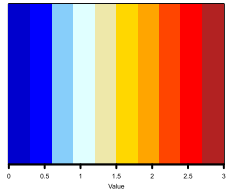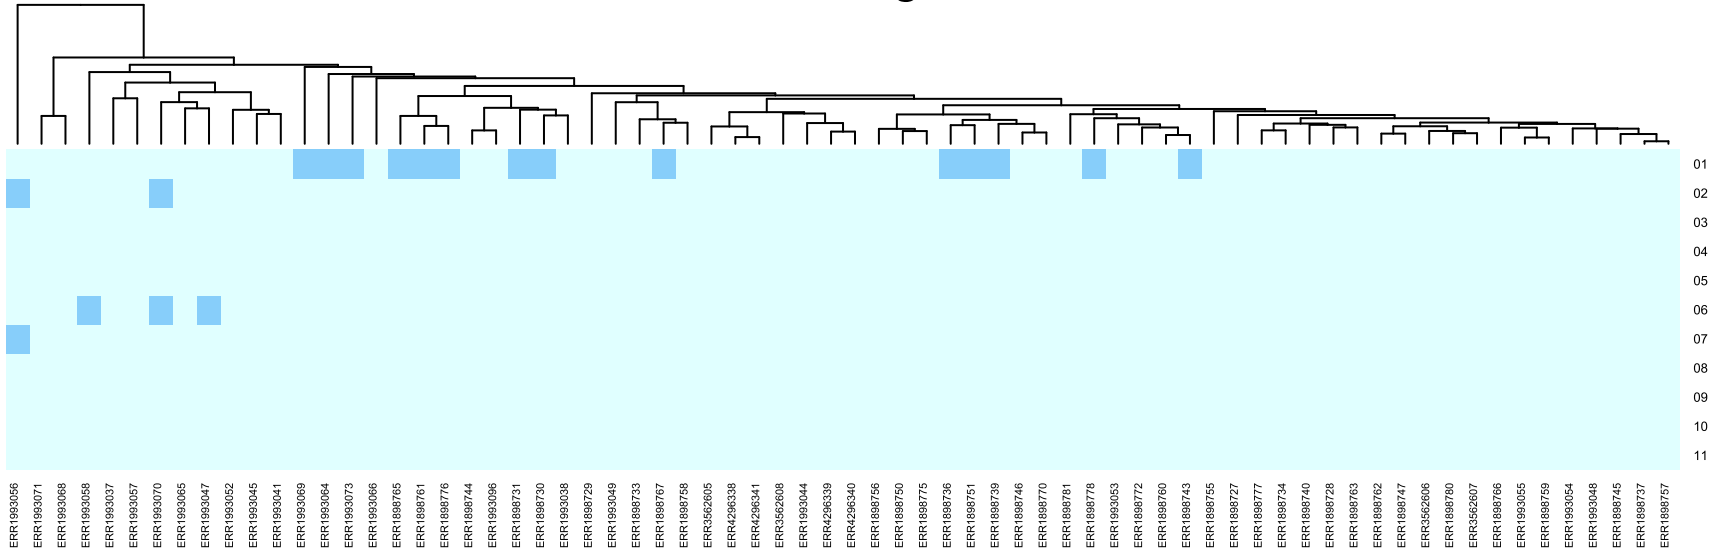

# *T. vivax*

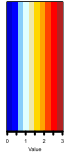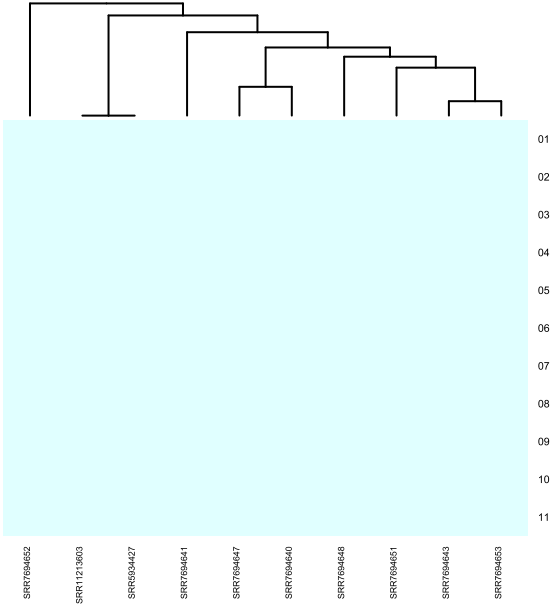

Supplement: Supplemental_Fig_S1.pdf [file Supplemental_Fig_S1.pdf]
