# Supplementary material for: Ancestral aneuploidy and stable chromosomal duplication resulting in differential genome structure and gene expression control in trypanosomatid parasites
Source: Genome Res. 2024 Mar;34(3):441–53. doi: 10.1101/gr.278550.123 (PMC11067883; doi:10.1101/gr.278550.123)
Supplement: Supplement 11 [file Supplemental_Table_S1.xlsx]

## Sheet: Plan1
Supplementary Table 1: Read library collections and reference genomes. SCG: Single Copy Genes
Group	Number of samples	Reference Genome (Database)	Number of SCG used in CCNV estimation
Crithidia bombi	29	GCA_900240985.1 [88]	6289
Crithidia fasciculata	3	TriTrypDB-55_CfasciculataCfCl (TriTrypdB)	7956
Endotrypanum	5	TriTrypDB-55_Endotrypanum-monterogeii_LV88 (TriTrypdB)	7041
Leishmania donovani complex	225	TriTrypDB-55_LdonovaniLV9 (TriTrypDB)	7057
Leishmania major	16	TriTrypDB-55_LmajorFriedlin (TriTrypDB)	7559
Leptomonas	16	TriTrypDB-55_Leptomonas-pyrrhocoris_H10 (TriTrypDB)	8234
Paratrypanosoma	2	TriTrypDB-55_Paratrypanosoma-confusum_CUL13 (TriTrypDB)	6272
Porcisia	5	TriTrypDB-55_Porcisia-hertigi_C119 (TriTrypDB)	7292
T. brucei	187	TriTrypDB-55_TbruceiTREU927 (TriTrypDB)	7368
T. congolense	70	TriTrypDB-55_Trypanosoma-congolense_IL3000 (TriTrypDB)	4923
T. cruzi	298	TriTrypDB-55_TcruziCLBrenerNon-Esmeraldo-like (TriTrypDB)	6872
T. vivax	10	TriTrypDB-55_ Trypanosoma-vivax_Y486 (TriTrypDB)	6618
