# Supplementary material for: Ancestral aneuploidy and stable chromosomal duplication resulting in differential genome structure and gene expression control in trypanosomatid parasites
Source: Genome Res. 2024 Mar;34(3):441–53. doi: 10.1101/gr.278550.123 (PMC11067883; doi:10.1101/gr.278550.123)
Supplement: Supplement 12 [file Supplemental_Table_S2.xlsx]

## Sheet: C.bombi
Supplementary Table 2: Overview of the WGS read libraries used in the CCNV estimations. Including read counts, proportion of used reads, genome coverage and the estimate of somy for each chr/scaffold. Each clade is represented in a different tab.
Sample	BioProject	DOI	Culture_medium	Culture_temp	Total_read_count	Mapped_reads	Mapped_Percentage	Mapped_MapQ30	Used_perc	Genome_Coverage_(X)_Single_Copy	scaffold3_0_ref0000008_ref0000178	scaffold3_100_ref0000093_ref0000064	scaffold3_111_ref0000158_ref0000110	scaffold3_119_ref0000193_ref0000112	scaffold3_122_ref0000072_ref0000037	scaffold3_123_ref0000086_ref0000198	scaffold3_132_ref0000147_ref0000183	scaffold3_134_ref0000141_ref0000089	scaffold3_135_ref0000140_ref0000077	scaffold3_137_ref0000142_ref0000121	scaffold3_140_ref0000118_ref0000016	scaffold3_143_ref0000121_ref0000095	scaffold3_144_ref0000122_ref0000188	scaffold3_146_ref0000124_ref0000162	scaffold3_150_ref0000136_ref0000014	scaffold3_151_ref0000098_ref0000065	scaffold3_152_ref0000097_ref0000182	scaffold3_159_ref0000090_ref0000151	scaffold3_15_ref0000056_ref0000196	scaffold3_161_ref0000066_ref0000098	scaffold3_170_ref0000030_ref0000054	scaffold3_172_ref0000034_ref0000171	scaffold3_186_ref0000027_ref0000076	scaffold3_190_ref0000184_ref0000152	scaffold3_196_ref0000186_ref0000175	scaffold3_1_ref0000007_ref0000033	scaffold3_22_ref0000076_ref0000028	scaffold3_25_ref0000083_ref0000177	scaffold3_26_ref0000080_ref0000045	scaffold3_27_ref0000081_ref0000078	scaffold3_29_ref0000075_ref0000019	scaffold3_33_ref0000109_ref0000160	scaffold3_35_ref0000103_ref0000036	scaffold3_3_ref0000005_ref0000163	scaffold3_42_ref0000128_ref0000190	scaffold3_46_ref0000132_ref0000205	scaffold3_47_ref0000133_ref0000147	scaffold3_4_ref0000012_ref0000109	scaffold3_55_ref0000154_ref0000002
ERR3418932	PRJEB33388	Gerasimov et al., 2019	FP-FB	27°C	26716962	25169851	94.2093	18400921	68.8735	91	1.681	1.033	0.989	1.022	1.022	1.022	0.967	0.989	0.967	1.016	1.033	1.005	1	0.989	0.978	1.011	0.989	1.033	0.989	1.005	0.978	0.978	1.033	1	1.027	0.956	1.011	1.011	1	1.011	0.967	1	0.967	1.022	1.044	1.011	0.989	1	1
ERR3418933	PRJEB33388	Gerasimov et al., 2019	FP-FB	27°C	23405954	22110195	94.464	16631406	71.0563	82	1.72	1.024	0.9756	1.012	1.018	1.03	0.9878	1	0.9878	1.012	1.037	1.012	0.9878	1	0.9756	1.024	0.9878	1.024	0.9665	1.012	0.9756	0.9878	1.024	1	1.012	0.9756	0.9878	1.012	1.012	1	0.9634	1.012	0.9756	0.9878	1.037	1.024	0.9878	1	1.012
ERR3418934	PRJEB33388	Gerasimov et al., 2019	FP-FB	27°C	36017133	32405912	89.9736	21854570	60.6783	79	2.051	1.171	0.962	1	1.025	1.367	1	0.9873	0.962	0.9747	1.323	0.962	1	0.9747	1	0.9873	0.962	1.013	0.9494	1	0.9747	0.9494	1.025	1	0.9873	0.962	0.962	1	1.329	1.082	0.9367	1.051	0.9494	0.962	0.9873	0.9873	0.9747	0.9873	0.9873
ERR3418935	PRJEB33388	Gerasimov et al., 2019	FP-FB	27°C	36936575	33471642	90.6192	22669229	61.3734	82	1.634	1.39	0.9634	1.037	1.085	1.39	1.012	1.317	0.9634	1.317	1.024	1.024	1.323	0.9634	0.9512	0.9878	0.9634	1.375	0.9878	1.341	0.9756	1	0.9878	1	1.03	1.268	0.9756	0.9878	1.36	1.055	0.9634	1.037	0.9634	1.049	0.9878	0.9756	0.9634	0.9756	1.634
ERR3418936	PRJEB33388	Gerasimov et al., 2019	FP-FB	27°C	28242626	24522031	86.8263	17739992	62.8128	62	2.21	1.129	0.9516	0.9677	1.29	1.355	0.9355	1.339	0.9355	1.242	0.9597	0.9516	1.339	0.9516	0.9516	0.9516	0.9516	1.339	0.9194	0.9839	0.9355	0.9355	0.9839	0.9516	1	1.274	0.9355	0.9516	1.323	0.9839	0.9516	1.323	0.9194	1	0.9839	0.9516	0.9516	1.323	1.323
ERR3418937	PRJEB33388	Gerasimov et al., 2019	FP-FB	27°C	24205197	15490135	63.9951	11929239	49.2838	55	2.4	1.018	0.9818	1.018	1	1.455	0.9818	0.9818	0.9455	1	1.018	0.9818	0.9818	0.9818	0.9636	1	0.9636	1	0.9364	0.9909	0.9591	0.9636	1	1	1	0.9455	0.9818	1.055	1.382	0.9818	0.9636	1	0.9636	1	1.018	1.009	0.9818	0.9818	1.418
ERR3418938	PRJEB33388	Gerasimov et al., 2019	FP-FB	27°C	32683077	24009678	73.4621	17397359	53.2305	63	1.952	1.222	0.9365	1.127	1.254	1.19	1.103	0.9841	0.9524	1.222	1.127	1.063	0.9365	0.9524	0.9206	1.032	0.9524	1.095	0.9921	1.175	0.9524	0.9683	1	1.048	1.159	0.8889	0.9365	1.032	1.175	1.111	0.9524	1.111	0.9206	1.206	0.9841	1.056	0.9365	0.9365	1.381
ERR3418939	PRJEB33388	Gerasimov et al., 2019	FP-FB	27°C	29946480	26506868	88.5141	19054085	63.6271	68	1.853	1.235	0.9706	0.9853	0.9559	1.029	0.9412	1.324	0.9559	1.324	0.9706	0.9706	1.353	0.9706	0.9853	0.9706	0.9706	1.015	0.9632	0.9706	0.9853	1.015	1	0.9559	0.9853	1.324	0.9559	1.059	0.9706	1	0.9265	1.015	0.9706	0.9559	1.015	0.9706	0.9853	0.9853	1.309
ERR3418940	PRJEB33388	Gerasimov et al., 2019	FP-FB	27°C	37069157	30887800	83.3248	21355520	57.6099	79	1.861	1.215	0.9494	0.9747	1.057	1.241	0.9367	1.089	0.9241	1.038	0.9557	0.9494	1.089	0.9494	0.962	0.9684	0.9367	1.013	0.9051	1.013	0.9494	0.9367	0.9937	0.9494	1.127	1.063	0.962	1	1.196	0.9937	0.8987	0.9873	0.9367	1.139	0.9747	0.962	0.962	1.038	1.291
ERR3418941	PRJEB33388	Gerasimov et al., 2019	FP-FB	27°C	34485793	30539853	88.5578	20966377	60.7971	74	2.095	1.014	0.9865	0.9865	0.9595	1.378	0.9595	1.334	0.973	1.297	1.324	0.9865	1.358	0.973	0.973	0.9595	0.9865	0.9932	0.9932	1	0.9865	0.9865	1.007	0.9595	1	1.297	0.973	0.9865	1.297	0.973	0.9324	1	0.973	0.9865	1.014	0.9865	0.9865	0.9865	1.324
ERR3418942	PRJEB33388	Gerasimov et al., 2019	FP-FB	27°C	36702588	33532276	91.3622	22690859	61.8236	84	1.833	1.19	0.9762	1	1.298	1.071	0.9643	1	0.9702	0.9881	1	0.9643	1	0.9762	1.012	1.009	0.9643	1.024	0.9524	1	0.9762	0.9643	1.024	0.994	1.369	0.9524	0.9881	1	1.03	1.024	0.9643	1.012	0.9643	1.393	1.012	0.9881	0.9762	1	1.274
ERR3418943	PRJEB33388	Gerasimov et al., 2019	FP-FB	27°C	30102990	25386885	84.3334	18092599	60.1023	64	2.266	1.43	0.9688	1.266	1.25	1.016	0.9531	1	0.9531	0.9766	0.9766	0.9453	0.9844	1.219	0.9688	0.9805	0.9688	1	0.9531	1.25	0.9688	0.9844	1.266	0.9844	1.016	0.9531	0.9688	0.9844	0.9844	1.031	0.9375	1.016	0.9688	1.008	1.016	0.9688	0.9688	0.9844	1.25
ERR3418944	PRJEB33388	Gerasimov et al., 2019	FP-FB	27°C	34673131	28037560	80.8625	19459957	56.124	71	2.225	1.014	0.9718	1.021	1.014	1.141	0.9577	1.254	0.9577	1.014	1	1	1.225	0.9718	1	0.993	0.9718	1.014	0.9718	1.07	0.9859	0.9577	1.014	0.9859	1	1.211	0.9718	0.9859	1.099	1	0.9859	1.014	0.9577	1.014	0.9718	0.993	0.9718	1.014	1.127
ERR3418945	PRJEB33388	Gerasimov et al., 2019	FP-FB	27°C	26061530	24759285	95.0032	17772422	68.1941	87	2.172	1.264	0.9885	1.023	0.9943	1.368	0.9885	1	0.9655	1	1.023	1.011	1.011	1	0.9598	0.9885	0.977	1.011	0.977	1.356	0.9655	0.9885	1	0.9885	1.023	0.977	0.977	1	1.328	1.011	0.954	1	0.977	0.954	1.017	1.046	0.9885	1	1.011
ERR3418946	PRJEB33388	Gerasimov et al., 2019	FP-FB	27°C	23819480	22217356	93.2739	16328957	68.5529	78	2.192	1.282	0.9744	1.038	0.9872	1.391	0.9615	1.013	0.9744	1.026	1.038	1	1.032	0.9872	0.9487	0.9744	0.9744	1.013	0.9872	1.385	0.9615	0.9872	1.013	0.9808	1.026	0.9872	0.9744	1.051	1.346	1.026	0.9615	1.026	0.9679	1	1.026	1.026	0.9872	0.9872	1.372
ERR3418947	PRJEB33388	Gerasimov et al., 2019	FP-FB	27°C	37288573	34927462	93.668	13650770	36.6084	49	2.061	1.286	0.9592	1	1.306	1.388	0.9592	0.9796	0.9592	1	1.337	0.9694	1.02	0.9592	0.9388	0.9796	0.9592	1	0.9694	0.9796	0.9796	0.9796	1	0.9592	1.02	0.9592	0.9388	0.9796	1.306	1.082	0.9184	1	0.9592	0.9796	0.9796	0.9796	0.9796	1	1.367
ERR3418948	PRJEB33388	Gerasimov et al., 2019	FP-FB	27°C	34930973	31179180	89.2594	12428754	35.5809	45	2.089	1.289	0.9556	1.067	1.044	1.267	0.9778	1.089	0.9333	0.9778	1	0.9333	1.111	0.9556	0.9556	0.9556	0.9333	0.9778	0.9556	1.089	0.9556	0.9778	1	0.9556	1.289	1	0.9778	0.9556	1.267	1	0.9333	1	0.9556	1.311	0.9889	0.9556	0.9556	0.9778	1.356
ERR3418949	PRJEB33388	Gerasimov et al., 2019	FP-FB	27°C	47397485	44469947	93.8234	16745025	35.3289	60	1.75	1.3	0.9667	1.017	1.367	1.383	0.95	1.367	0.95	1.333	0.9667	0.9833	1.35	0.9667	0.9833	0.9833	0.9667	1	0.95	1.383	0.9667	0.95	1.017	1.383	0.9833	1.317	0.9667	1.017	1.35	1.017	0.9667	0.9833	0.95	1.05	0.9833	0.9833	0.9667	0.9833	1.367
ERR3418950	PRJEB33388	Gerasimov et al., 2019	FP-FB	27°C	39461887	35736941	90.5606	13834353	35.0575	49	2.306	1	0.9592	0.9796	1.306	1.02	0.898	1.347	0.9388	1.265	1.286	0.9388	1.367	0.9592	0.9592	0.9286	0.9592	1.286	0.9592	1	0.9592	0.9592	1	0.9388	0.9898	1.327	0.9388	1.061	0.9592	0.9592	0.8776	1	0.9592	0.9184	1.041	1	0.9592	0.9796	1.327
ERR3418951	PRJEB33388	Gerasimov et al., 2019	FP-FB	27°C	36573700	32056337	87.6486	12747155	34.8533	45	2.022	1	0.9556	1	0.9778	1.311	0.9556	1.289	0.9556	1.289	0.9778	1.267	1.278	0.9556	0.9556	0.9778	0.9556	1.311	0.9667	1	0.9556	0.9556	1	0.9778	1.311	1.2	0.9778	0.9889	1.267	0.9778	0.9333	0.9778	0.9556	1.267	0.9778	0.9778	0.9778	0.9778	1.267
ERR3418952	PRJEB33388	Gerasimov et al., 2019	FP-FB	27°C	32087611	28191354	87.8574	11223872	34.9788	38	2.605	1.079	0.9737	0.9737	1.132	1	0.9211	1.368	0.9737	1.132	0.9605	1.158	1.421	0.9474	0.9737	0.9474	0.9737	1.395	0.9474	0.9737	0.9605	0.9737	1	0.9737	1	1.316	0.9474	0.9737	0.9737	1	0.9211	1.158	0.9474	0.9474	1.026	1.026	0.9737	0.9737	1.132
ERR3418953	PRJEB33388	Gerasimov et al., 2019	FP-FB	27°C	32674569	27613523	84.5108	11175106	34.2012	41	2	1.024	0.9512	1	1	1.22	0.9512	0.9756	0.9512	0.9756	1.049	0.9756	0.9756	0.9512	0.9756	0.9756	0.9512	1.024	0.9268	1	0.9512	0.9512	1.024	1	1	0.9024	0.9756	1	1.22	1	0.9512	1.012	0.9268	1.024	1	0.9756	0.9512	0.9756	1.22
ERR3418954	PRJEB33388	Gerasimov et al., 2019	FP-FB	27°C	27134573	25421806	93.6879	18441836	67.9643	89	1.753	1.09	0.9775	1.022	1.011	1.135	0.9551	1.146	0.9663	1.112	1.112	1	1.169	0.9831	0.9551	0.9888	0.9775	1.18	0.9719	1.124	0.9663	0.9888	1.011	1	1.107	1.135	0.9663	1	1.09	1.028	0.9663	1.022	0.9663	1.067	1.022	1.022	0.9775	0.9888	1.124
ERR3418955	PRJEB33388	Gerasimov et al., 2019	FP-FB	27°C	24046077	22490823	93.5322	16624018	69.134	77	2	1.429	0.974	1.039	1.13	1.416	1.006	1	0.961	1	1.026	1.013	0.974	1.364	0.974	1	0.974	1.026	0.9481	1.377	0.961	0.974	1.416	1.013	1.071	0.9351	1	1.065	1.383	1.039	0.9935	1.026	0.9481	1.091	1.039	1	0.974	0.987	1.026
ERR3418956	PRJEB33388	Gerasimov et al., 2019	FP-FB	27°C	24771750	23363413	94.3148	16979618	68.5443	80	1.887	1.275	0.9812	1.025	1.438	1.462	0.9625	1	0.9625	1.375	1.05	0.9812	1.012	0.9875	0.9625	0.9875	0.9625	1.081	0.975	1.238	0.9625	1.012	1.012	1.012	1.025	0.975	0.9812	1.038	1.431	1.025	0.95	1.012	0.9625	0.9875	1.012	1.025	0.9875	0.9875	1.087
ERR3418957	PRJEB33388	Gerasimov et al., 2019	FP-FB	27°C	29539474	26787549	90.6839	18543527	62.7754	88	1.997	1.432	0.9886	1	1.125	1.489	0.9773	0.9886	0.9773	0.9886	1	0.9886	1	0.9773	0.9773	0.9659	0.9716	1	0.9659	1.42	0.9716	1	1	0.9773	0.9773	0.9773	0.9773	1.011	1.443	1.023	0.9773	0.9886	0.9659	0.9943	1.011	1.051	0.9886	0.9972	1.364
ERR3418958	PRJEB33388	Gerasimov et al., 2019	FP-FB	27°C	24912365	22419667	89.9941	16225565	65.1306	76	2.092	1.461	0.9737	1.013	1.132	1.513	0.9605	0.9868	0.9737	1	1.013	0.9605	1.01	0.9803	0.9605	0.9868	0.9737	1	0.9737	1.447	0.9737	1.013	1	0.9868	1.013	0.9868	0.9868	1	1.474	1.02	0.9737	1	0.9737	0.9868	1.026	1.02	0.9868	1	1.395
ERR3418959	PRJEB33388	Gerasimov et al., 2019	FP-FB	27°C	30392275	28661053	94.3037	19983777	65.7528	99	1.646	1.02	0.9899	1.02	1.01	1.025	0.9798	1	0.9899	1.01	1.02	0.9899	0.9949	1	0.9798	1	1	1.01	0.9697	1.02	0.9798	0.9899	1.02	1.01	1	0.9899	1	1.01	1.015	0.9899	0.9899	1.005	0.9798	1.02	1.005	1.02	0.9899	1	1.01
ERR3418960	PRJEB33388	Gerasimov et al., 2019	FP-FB	27°C	24194401	22784863	94.1741	16614503	68.6709	78	2.038	1.397	0.9744	1.013	1.218	1.423	0.9744	1	0.9487	1.333	1.641	0.9872	1	0.9872	0.9487	0.9744	0.9744	1.013	0.9872	1.077	0.9744	1	1.003	0.9744	1.019	1	0.9744	0.9872	1.333	1.09	0.9615	1.013	0.9615	0.9872	1.026	1.026	0.9744	0.9872	1.333
[truncated: 16 more columns]

## Sheet: C. fasciculata
Sample	BioProject	DOI	Culture_medium	Culture_temp	Parasite_stage	Total_read_count	Mapped_reads	Mapped_Percentage	Mapped_Percentage_MapQ30	Used_perc	Genome_Coverage_Single_Copy	CfaC1_01	CfaC1_02	CfaC1_03	CfaC1_04	CfaC1_05	CfaC1_06	CfaC1_07	CfaC1_08	CfaC1_09	CfaC1_10	CfaC1_11	CfaC1_12	CfaC1_13	CfaC1_14	CfaC1_15	CfaC1_16	CfaC1_17	CfaC1_18	CfaC1_19	CfaC1_20	CfaC1_21	CfaC1_22	CfaC1_23	CfaC1_24	CfaC1_25	CfaC1_26	CfaC1_27	CfaC1_28	CfaC1_29	CfaC1_30
SRR1028161	PRJNA165885	Warren et al., 2021	M199	NA	NA	11744295	9444261	80.4157	7719105	65.7264	22	1.136	1	1	1.045	1.045	1.068	1.045	1.045	1.045	1	1	1.091	1.091	1	1	1	1	1.011	1	1	0.9659	0.9545	1	0.9091	0.9545	0.9545	1.864	0.9545	0.9545	0.9545
SRR1593518	PRJNA165885	Warren et al., 2021	M199	NA	NA	54964679	46310921	84.2558	27759663	50.5046	73	1.082	0.9863	0.9726	1.055	1.027	1.082	1.014	1.041	1.041	0.9521	0.9589	1.055	1.055	1.014	1.007	1.007	0.9589	1.014	1	0.9726	0.9726	0.9726	1.014	0.9452	0.9589	0.9589	1.603	0.9726	0.9863	0.9726
SRR7059046	PRJNA453146	Ghobakhloo et al., 2018	RPMI 1640	25°C	Promastigote	2623309	2559543	97.5692	2078423	79.2291	10	0.9	0.9	0.9	0.9	0.9	1	0.9	0.9	0.9	0.9	0.9	0.9	1	0.9	1	0.9	0.9	1.3	0.9	1.7	0.9	0.9	0.9	0.9	0.9	0.9	1.9	0.9	0.9	0.9

## Sheet: Endotrypanum
Sample	BioProject	DOI	Culture_medium	Culture_temp	Parasite_stage	Total_read_count	Mapped_reads	Mapped_Percentage	Mapped_Percentage_MapQ30	Used_perc	Genome_Coverage_Single_Copy	EmoLV88_01	EmoLV88_02	EmoLV88_03	EmoLV88_04	EmoLV88_05	EmoLV88_06	EmoLV88_07	EmoLV88_08	EmoLV88_09	EmoLV88_10	EmoLV88_11	EmoLV88_12	EmoLV88_13	EmoLV88_14	EmoLV88_15	EmoLV88_16	EmoLV88_17	EmoLV88_18	EmoLV88_19	EmoLV88_20	EmoLV88_21	EmoLV88_22	EmoLV88_23	EmoLV88_24	EmoLV88_25	EmoLV88_26	EmoLV88_27	EmoLV88_28	EmoLV88_29	EmoLV88_30	EmoLV88_31	EmoLV88_32	EmoLV88_33	EmoLV88_34	EmoLV88_35	EmoLV88_36
SRR1028157	PRJNA165953	Warren et al., 2021	NA	NA	NA	12394993	12388949	99.9512	9599187	77.4441	32	1	0.9688	1.016	1	1.688	1	1.406	1	1.031	1	1.031	1	1	0.9688	1	1	1	0.9688	1	1	1.031	0.9688	1.406	0.9688	1	1	1	1	1.062	1	1.75	1	1	0.9844	1	1
SRR547642	PRJNA165953	Warren et al., 2021	NA	NA	NA	17698584	17649545	99.7229	13089593	73.9584	40	0.975	0.925	0.975	1	1.575	0.975	1.375	0.95	1	1	0.975	0.975	0.975	0.95	1	1	0.975	0.975	0.975	0.975	1	0.975	1.375	0.975	0.975	1	0.975	0.975	1.05	0.975	1.675	0.975	0.975	0.975	0.975	0.975
SRR547645	PRJNA165953	Warren et al., 2021	NA	NA	NA	56846606	55101274	96.9297	20992703	36.9287	47	0.7979	0.8723	0.8298	0.8723	1.34	0.8723	1.234	0.8723	0.9362	0.9362	0.9787	0.9574	0.9149	0.9787	0.8936	0.9574	0.9787	0.9787	1	0.9787	0.9362	0.9787	1.298	0.9362	0.9574	1	1.021	0.9787	1.106	1.021	1.574	1.043	1.021	1.043	1.021	1.021
SRR1662202	PRJNA267749	Harkins et al., 2016	Schneider	22°C	Promastigote	25936620	18325843	70.6562	8791618	33.8965	41	0.6585	0.6463	0.7561	0.8049	1.085	0.8049	0.8537	0.7561	0.8537	0.8049	1.207	1.049	0.8902	1.244	1.073	0.878	0.9024	0.9268	0.9268	0.9756	0.9268	0.9024	1.244	1.244	0.9268	1.317	1.024	1.244	1.024	1	1.415	0.9512	1.293	0.9878	1	0.9756
SRR13124523	PRJNA680236	Albanaz et al., 2021	M199	NA	Promastigote	46708772	43395898	92.9074	27625942	59.1451	91	0.9451	0.956	0.9451	0.956	0.956	0.956	0.967	0.9451	0.956	0.978	0.978	0.967	0.978	0.978	0.956	0.978	0.989	0.978	0.978	0.978	0.978	0.989	1.066	1.275	0.978	1.286	0.989	0.989	1.005	0.989	1.495	1.011	1	1	1.016	1

## Sheet: L. donovani EA_HIV
Sample	BioProject	DOI	Total_read_count	Mapped_reads	Mapped_Percentage	Mapped_Percentage_MapQ30	Used_perc	Genome_Coverage_Single_Copy	LdLV9_01_v1_pilon	LdLV9_02_v1_pilon	LdLV9_03_v1_pilon	LdLV9_04_v1_pilon	LdLV9_05_v1_pilon	LdLV9_06_v1_pilon	LdLV9_07_v1_pilon	LdLV9_08_v1_pilon	LdLV9_09_v1_pilon	LdLV9_10_v1_pilon	LdLV9_11_v1_pilon	LdLV9_12_v1_pilon	LdLV9_13_v1_pilon	LdLV9_14_v1_pilon	LdLV9_15_v1_pilon	LdLV9_16_v1_pilon	LdLV9_17_v1_pilon	LdLV9_18_v1_pilon	LdLV9_19_v1_pilon	LdLV9_20_v1_pilon	LdLV9_21_v1_pilon	LdLV9_22_v1_pilon	LdLV9_23_v1_pilon	LdLV9_24_v1_pilon	LdLV9_25_v1_pilon	LdLV9_26_v1_pilon	LdLV9_27_v1_pilon	LdLV9_28_v1_pilon	LdLV9_29_v1_pilon	LdLV9_30_v1_pilon	LdLV9_31_v1_pilon	LdLV9_32_v1_pilon	LdLV9_33_v1_pilon	LdLV9_34_v1_pilon	LdLV9_35_v1_pilon	LdLV9_36_v1_pilon
ERR3956070	PRJEB30077	Franssen et al., 2021	5513248	5479775	99.3929	4578702	83.0491	21	1	1.048	1.048	1	1	1.048	1.048	1	1	1	1	1.048	1	1	1	1	1	1.048	1	1	1	1	1	1.048	1	1.048	1	1	1	1	1.952	1	1	1	1	1
ERR3956071	PRJEB30077	Franssen et al., 2021	4752611	4723065	99.3783	3953226	83.1801	19	0.9474	1	1	1	1	1	1	0.9474	1	1	1	1	0.9474	1	1	1	1	1	0.9474	1	1	1	0.9474	0.9474	0.9474	1	0.9474	0.9474	0.9474	0.9474	1.895	0.9474	1	0.9474	0.9474	0.9474
ERR3956072	PRJEB30077	Franssen et al., 2021	5349588	5338045	99.7842	4461621	83.4012	21	0.9524	1	1.048	1	1	1	1	1	1	1	1	1	0.9524	1	1	1	1	1	1	1	1	1	1	1	0.9524	1	0.9524	1	1	1	1.905	0.9524	1	0.9524	0.9524	0.9524
ERR3956073	PRJEB30077	Franssen et al., 2021	5258016	5243392	99.7219	4396433	83.6139	21	0.9524	1	1	1	1	1	1	1	1	0.9881	1	1	1	1	1	1	1	1	1	1	1	0.9524	1	1	0.9524	0.9524	0.9524	0.9524	0.9524	0.9524	1.833	0.9524	0.9524	0.9524	0.9524	0.9524
ERR3956074	PRJEB30077	Franssen et al., 2021	5428179	5418803	99.8273	4539476	83.628	21	1.048	1.095	1.048	1.048	1.048	1.048	1.048	1	1.048	1.048	1.048	1	1	1	1	1.048	1.048	1.048	1	1	1.048	1	1	1	1	1	1	1	1	1	1.905	1	1	0.9524	1	0.9524
ERR3956075	PRJEB30077	Franssen et al., 2021	5059322	5048791	99.7918	4244123	83.8872	20	1	1.05	1.05	1.05	1	1.05	1.05	1	1	1	1	1	1	1	1	1	1	1	1	1	1	0.95	1	1	1	1	1	0.95	1	1	1.9	0.95	0.95	0.95	0.95	0.95
ERR3956076	PRJEB30077	Franssen et al., 2021	6042615	6027133	99.7438	5034663	83.3193	23	1	1.043	1.043	1	1	1.043	1.043	1	1	1	1.022	1	1.043	1.022	1	1.043	1.043	1	1	1	1.043	1	1	1.043	1	1.043	1.043	1	1.043	1	1.957	1	1	1	1	1
ERR3956077	PRJEB30077	Franssen et al., 2021	5847755	5802284	99.2224	4839189	82.7529	23	1	1	1.043	1	0.9565	1	1	0.9565	1	1	1	1	1	1	0.9565	1	1	0.9783	0.9565	0.9565	1	0.9674	1	1	1	1	0.9565	0.9565	1	0.9565	1.826	0.9565	1	0.9565	0.9565	0.9565
ERR3956078	PRJEB30077	Franssen et al., 2021	6390183	6344428	99.284	5249567	82.1505	25	1	1.04	1.04	1	1	1	1	0.96	1.04	1	1	1.02	1	1	1	1	1	1	0.96	1	1	0.96	1	1	1	1	0.96	0.96	0.96	0.96	1.84	0.96	0.96	0.96	0.96	0.96
ERR3956079	PRJEB30077	Franssen et al., 2021	5817678	5769864	99.1781	4783616	82.2255	22	1	1.045	1.045	1.045	1	1.045	1.045	1	1.045	1.045	1.045	1.045	1.045	1.045	1.045	1.045	1.045	1.045	1.045	1.045	1.045	1	1.045	1.045	1.045	1.045	1	1	1	1	1.909	1	1	1	1	1
ERR3956080	PRJEB30077	Franssen et al., 2021	6629723	6545825	98.7345	5415938	81.6918	26	0.9615	0.9808	1	0.9615	1.038	1	1	0.9615	1	1	1	1	1	0.9615	1	1	1	1	0.7692	1	1	0.9615	1.038	1	1	0.9615	1	0.9615	0.9615	0.9615	1.846	0.9615	0.9615	0.9615	0.9615	0.9615
ERR3956081	PRJEB30077	Franssen et al., 2021	5726635	5657414	98.7912	4716426	82.3595	22	1	1.045	1.045	1	1.045	1.045	1.045	1	1.045	1.023	1.045	1.023	1	1.045	1.023	1.045	1.045	1	1	1	1	1	1.045	1	1	1	1	1	1	1	1.909	1	1	0.9545	0.9545	0.9545
ERR3956082	PRJEB30077	Franssen et al., 2021	5334327	5300931	99.3739	4452200	83.4632	21	0.9524	0.6667	1	1	1	1.238	1	1	1.048	1	1	1	1	1	1	1	1	1	1	1	1	0.9524	1	1	0.9524	1.048	0.9524	1	0.9524	0.9524	1.857	0.9524	0.9524	0.9524	0.9524	0.9524
ERR3956083	PRJEB30077	Franssen et al., 2021	5782752	5715331	98.8341	4781829	82.6912	22	1.091	0.7273	1	1.091	1	1.045	1	1.045	1.091	1	1	1.045	1	1.091	1	1.045	1.045	1	1	1	1	1	1.182	1.023	1	1	1	1	1	1	1.909	1	1	0.9545	1	1
ERR3956084	PRJEB30077	Franssen et al., 2021	7236751	7180962	99.2291	5918448	81.7832	28	1	1.018	1.036	1	1	1.036	1	0.9821	1	1.036	1.036	1	1	1	1	1	1	1	1	1	1	1	1	1	1	1	1	1	1	0.9643	1.857	1	1	0.9643	0.9643	0.9643
ERR3956085	PRJEB30077	Franssen et al., 2021	5959663	5904236	99.07	4896804	82.1658	23	0.9565	0.9783	1	0.9565	1	1	1	0.9565	1	1	1	1	1	1	0.9565	1	1	1	1	0.9565	1	0.9565	1	1	0.9783	0.9565	0.9565	1	1.435	1	1.87	0.9565	1	0.9565	0.9565	0.9565
ERR3956086	PRJEB30077	Franssen et al., 2021	6661144	6596682	99.0323	5427682	81.4827	25	1	1.04	1.04	1	1.04	1.04	1	1	1.04	1	1.04	1.04	1	1.04	1	1.03	1.04	1.04	1.04	1.04	1.04	1	1.04	1.03	1	1	1	1	1	1	1.92	1	1	1	1	1
ERR3956087	PRJEB30077	Franssen et al., 2021	5684058	5613118	98.7519	4688704	82.4887	22	1	1	1	1	1	1.045	1	1	1	1	1	1.045	1	1	1	1.023	1	1	1	1	1	1	1	1	1	1	1	1	0.9545	1	1.864	1	1	0.9545	0.9545	0.9545
ERR3956088	PRJEB30077	Franssen et al., 2021	5832583	5755989	98.6868	4803012	82.3479	22	1	0.9091	1.045	1	1.045	1.045	1.045	1	1.045	1.045	1.045	1.023	1.045	1	1	1.045	1.045	1	1	1	1.045	1	1.136	1.045	1	1	1	1	1	1	1.909	1	1	1	1	0.9545
ERR3956089	PRJEB30077	Franssen et al., 2021	5730000	5692179	99.34	4766107	83.1781	22	1	1.045	1.091	1.045	1.045	1.045	1	1	1.045	1.5	1.045	1.045	1.045	1	1.045	1	1.045	1.045	1	1.045	1	1	1.045	1	1	1.045	1	1	1	1	1.455	1	1	1	1	1
ERR3956090	PRJEB30077	Franssen et al., 2021	5674358	5589896	98.5115	4667331	82.253	22	0.9545	0.9545	1	1	1.136	1.045	1	1	1	1	1	1	1	1	0.9545	1	1	1	0.9545	1	1	0.9773	1	0.9545	1	1	0.9545	1	0.9545	0.9545	1.864	0.9545	0.9545	0.9545	0.9545	0.9545
ERR3956091	PRJEB30077	Franssen et al., 2021	5973637	5905908	98.8662	4933496	82.5878	23	1	1.043	1	1	1	1	1	1	1	1	1	1	1.043	1	1	1.043	1	1	1	1	1	1	1	1	1	1	1	1	1	1	1.87	1	1	0.9565	0.9783	1
ERR3956092	PRJEB30077	Franssen et al., 2021	4736714	4548246	96.0211	3831113	80.8812	18	0.9444	0.9444	1.222	1	1	1	1	0.9444	1	1.222	1	1	1	1	0.9722	1	1	1	0.9444	1	1	0.9444	1	1	1	0.9722	1.056	0.9444	0.9444	0.9444	1.889	0.9444	0.9444	0.9444	0.9444	0.9444
ERR3956093	PRJEB30077	Franssen et al., 2021	6446562	6333478	98.2458	5255913	81.5305	25	1	0.96	0.96	0.96	1.08	1.04	1.04	1.04	1.04	0.96	1	1	0.96	0.96	0.96	0.96	1.06	1	0.96	0.96	0.96	0.96	1.08	0.96	0.96	1	0.96	0.96	0.96	0.96	1.84	0.96	0.96	0.96	0.96	0.96
ERR3956094	PRJEB30077	Franssen et al., 2021	6892966	6812641	98.8347	5600273	81.2462	26	1	1.038	1.077	1	1.038	1.077	1.038	1.019	1.038	1	1.038	1.038	1.038	1.038	1	1.038	1.038	1.038	1	1	1.038	1	1	1	1	1	1	1	1	1	1.885	1	1	0.9615	1	1
ERR3956095	PRJEB30077	Franssen et al., 2021	7014184	6903610	98.4236	5715599	81.4863	27	1	1.037	1.074	1.037	1.037	1.037	1.037	1	1.037	1.037	1.037	1.037	1.037	0.8519	1.037	1.037	1.037	1.037	1.037	1.037	1.037	1	1.037	1.037	1	1.037	1	1	1	1	1.481	1	1	0.963	0.963	0.963
ERR3956096	PRJEB30077	Franssen et al., 2021	5689265	5650053	99.3108	4731349	83.1628	22	1	1.045	1	1	1	1	1.023	0.9545	1	1.023	1	1.045	1	1	1	1.045	1	1	1	1	1	1	1	1	1	1	1	1	1	1	1.864	1	1	0.9545	0.9545	0.9545
ERR3956097	PRJEB30077	Franssen et al., 2021	6592391	6018865	91.3002	4981468	75.5639	23	1	1	1.043	1	1	1.043	1	1	1	1	1	1	1	1	1	1	1	0.9674	0.6522	1	1.043	1	1.283	1	1	1	1	1	1	1	2	1	1	1	1	1
ERR3956098	PRJEB30077	Franssen et al., 2021	5034231	4958681	98.4993	4169351	82.82	19	1	1.053	1.053	1.053	1.053	1.053	1.053	1.053	1.053	1.053	1.053	1.053	1.053	1.053	1	1.053	1.053	1.053	1	1	1.053	1	1.053	1.053	1	1.039	1	1	1	1	1.947	1	1	1	1	1
ERR3956099	PRJEB30077	Franssen et al., 2021	6413260	6324087	98.6095	5260320	82.0226	24	0.9583	1	1	0.9792	1	1	1.458	0.9583	1.229	1	1.042	1	1.021	1	1	1.208	1	1	1	1.167	1	0.9583	1.208	1	1	1.208	1	1	1	1	1.875	1	1	0.9583	1	0.9583
ERR3956100	PRJEB30077	Franssen et al., 2021	5946547	5849399	98.3663	4880329	82.07	23	0.9565	1	1	1	1	1	1	0.9565	1	0.9565	1	1.043	1	1	1	1	1	1	1	1	1	0.9565	1	1	0.9565	0.9783	1	1	0.9565	0.9565	1.87	0.9565	1	0.9565	0.9565	0.9565
ERR3956101	PRJEB30077	Franssen et al., 2021	6665233	6610509	99.179	5451591	81.7914	25	1	1.04	1.08	1.04	1.04	1.04	1.04	1.04	1.04	1.04	1.04	1.04	1.04	1	1.04	1.04	1.04	1.04	1	1.04	1.04	1	1.04	1.04	1	1.04	1	1	1	1	1.92	1	1	0.96	1	1
ERR3956102	PRJEB30077	Franssen et al., 2021	6549734	6275725	95.8165	5178585	79.0656	24	1.042	1.042	1.083	1.042	1.042	1.042	1.042	1	1	1.042	1.083	1.042	1.042	1.01	1	1.042	1.042	1.042	1	1.042	1.042	1.042	1.042	1.042	1.042	1	1	1	1	1	1.917	1	1	1	1	1
ERR3956103	PRJEB30077	Franssen et al., 2021	6285916	6146166	97.7768	5131360	81.6326	24	0.9583	1	1	1	1	0.9583	1	0.9583	1	1.021	1	1	1	1	1.042	1.042	1	1	1	0.9583	1.042	0.9583	1.083	0.9583	0.9583	1	1	0.9583	0.9583	0.9583	1.833	1	1.042	0.9583	1	0.9583
ERR3956104	PRJEB30077	Franssen et al., 2021	7146585	6929633	96.9643	5694072	79.6754	27	0.963	1	1	0.963	1	1	1	1	1	1	1	1	1	1	1	1	1	0.5185	1	1	1	0.9815	1	1	1	1	1	1	1	1	1.889	1	1	1	1	1
ERR3956105	PRJEB30077	Franssen et al., 2021	4849903	4717859	97.2774	3965581	81.7662	18	1	1.056	1.056	1.056	1	1	1.056	1.056	1.056	1.056	1.056	1	1.056	1.056	1.056	1.056	1.056	1.056	1	1	1.042	1	1.056	1	1.056	1	1	1	1	1	1.944	1	1	1	1	1
ERR3956106	PRJEB30077	Franssen et al., 2021	4199444	4013699	95.5769	3405947	81.1047	16	0.9375	1	1	1	1	1	1	1	1	1	1	1	1	1	1	1	1	1	1	1	1	1	1.062	1	1	1	1	1	1	1	1.75	1	1	1	1	1
ERR3956107	PRJEB30077	Franssen et al., 2021	7554857	7398701	97.933	6052551	80.1147	28	1	1.036	1.036	1	1.036	1.036	1	1	1.036	1	1.036	1.036	1	1	1.036	1.036	1.036	1.036	1	1	1	1	1.036	1.018	1	1	1.036	1	1	1	1.893	1	1	0.9643	1	1
ERR3956108	PRJEB30077	Franssen et al., 2021	6279232	6204281	98.8064	5168232	82.3067	24	0.9583	1.042	1	1	1	1.042	1	1	1.042	1.042	1.042	1.042	1	1	1	1.042	1	1.042	1	1	1	1	1.042	1	1	1	1	1	1	1	1.917	1	1	1	1	1
ERR3956109	PRJEB30077	Franssen et al., 2021	5723150	5612660	98.0694	4664112	81.4955	22	1	1	1	1	1	1	1	1	1.045	1	1.045	1.045	1.045	1	1	1.045	1.045	1	1.045	1	1.045	1.023	1	1	1	1	1	1	1	1.045	1.5	1.045	1	0.9545	1	1
ERR3956110	PRJEB30077	Franssen et al., 2021	3568449	3431678	96.1672	2915552	81.7036	14	1	1	1	1	1	1	0.9286	0.9286	1	0.9286	1	1	1	1	1	1	1	1	1	1	0.9286	0.9286	1	1	0.9286	1	0.9286	0.9286	0.9286	0.9286	1.857	0.9286	0.9286	0.9286	0.9286	0.9286
ERR3956111	PRJEB30077	Franssen et al., 2021	8369937	8153201	97.4105	6648328	79.431	31	0.9355	0.9677	0.9677	0.9677	0.9677	0.9677	1	0.9677	1	1	1.032	1	1	1	1	1	1	1.016	1	1	0.9677	1	1.032	1	1	0.9677	1	1	1	1	1.871	1	1.032	1	1	1
ERR3956112	PRJEB30077	Franssen et al., 2021	6899328	6809109	98.6924	5602613	81.2052	26	0.9615	1	1	0.9904	1	1	1	1	1	1	1	1	1	1	1	1	1	1.038	1	1	1	1	1	1	0.9615	1	1	1	1	1	1.923	1	1	1	1	1
ERR3956113	PRJEB30077	Franssen et al., 2021	5963617	5930534	99.4453	4930008	82.6681	23	1	1.043	1	1	1	1	1.043	1	1	1	1.043	1	1	1	1	1	1	1	1	1	1	1	1	1	1	1	1	1	0.9565	1	1.87	1	1	0.9565	0.9565	0.9565
ERR3956114	PRJEB30077	Franssen et al., 2021	6844215	6722038	98.2149	5548563	81.0694	26	1	1	1.038	1	1.038	1	1.038	1	1.038	1.019	1	1	1	1	1	1	1	1	1	1	1.038	1	1	1	1	1	1	1	1	1	1.885	1	1	0.9615	1	1
ERR3956115	PRJEB30077	Franssen et al., 2021	4679159	4564986	97.56	3835680	81.9737	18	1	1.056	1	1	1	1	1	0.9444	1	1	1	1	1	1	1	1	1	1	1	1	1	1	1	1	1	1	1	1	1	1	1.889	1	1	0.9722	1	1
ERR3956116	PRJEB30077	Franssen et al., 2021	7593009	7565978	99.644	6219194	81.9068	29	1	1.31	1.172	1	1.138	1.034	1.034	0.9655	1.034	1.034	1.034	1.034	1.034	1.138	1	1.034	1.034	1.034	1	1	1	1	1	1	1	1	1.448	1	1	1	1.414	1	1	0.9655	0.9655	0.9655
ERR3956117	PRJEB30077	Franssen et al., 2021	6032182	5816151	96.4187	4843584	80.2957	23	0.9565	0.9565	0.9565	0.9565	0.9565	0.9565	0.9565	0.9565	1	1	1	1	1	0.9565	0.9565	1	1	1	0.9565	0.9565	1	1	0.9565	1	0.9565	0.9783	1	1	1	1	1.87	1	1	0.9565	1	1
ERR3956118	PRJEB30077	Franssen et al., 2021	6348978	6245295	98.3669	5184160	81.6535	24	1	1	1.042	1	1.042	1	1	1	1	1.021	1	1.042	1	1	1	1	1.042	1.042	1	1	1	1	1	1	1	1	1	1	1	1	1.917	1	1	1	1	1
ERR3956119	PRJEB30077	Franssen et al., 2021	6277778	5368393	85.5142	4461555	71.069	20	0.95	1.125	1	1.275	1.05	1.3	1	1.25	0.95	0.975	1	1.6	1.55	0.95	0.95	1.25	1	1.6	0.95	0.95	0.95	0.95	0.95	0.95	0.95	1.55	0.95	0.95	0.95	0.95	2.05	0.9	1.2	0.9	0.9	0.9
ERR3956120	PRJEB30077	Franssen et al., 2021	6748117	6686449	99.0862	5532481	81.9856	26	0.9615	1	1.038	1	1	1	1.038	0.9615	1	1	1.038	1.038	1.019	1	1	1	1	1	1	1	1	1	1	1.019	1	1	1	1	1	1	1.885	1	1	0.9615	1	1
ERR3956121	PRJEB30077	Franssen et al., 2021	7275619	7115243	97.7957	5828810	80.1143	27	1.037	1.037	1.037	1.037	1.037	1.037	1.037	1	1.037	1.037	1.037	1.037	1.037	1.037	1.037	1.037	1.037	1.037	1	1.037	1	1	1.037	1.037	1	1	1	1	1.037	1	1.889	1	1	0.963	1	1
ERR3956122	PRJEB30077	Franssen et al., 2021	6493995	6142949	94.5943	5118727	78.8225	24	1	0.9583	1.042	1	1	1	1	1	1.042	1	1.042	1.021	1	1	1	1.042	1	1	1	1	1	1	1.042	1	1	1.167	0.9583	0.9792	1	1	1.875	1	1	0.9583	0.9688	1
ERR3956123	PRJEB30077	Franssen et al., 2021	7081701	6218697	87.8136	5169934	73.0041	24	1	1	1.042	1	1.042	1.042	1.042	1	1.042	1	1.042	1.042	1.042	1.042	1.042	1.042	1.042	1.042	1	1.021	1.042	1	1.042	1.042	1	1	1	1.01	1	1	1.917	1	1	0.7917	1	1
ERR3956124	PRJEB30077	Franssen et al., 2021	6861178	6821587	99.423	5652694	82.3866	26	1.038	1.038	1.038	1	1.038	1.038	1.038	1	1.038	1.038	1.038	1	1.038	1	1.038	1.038	1.038	1.038	1.038	1.038	1.038	1	1.038	1.038	1.038	1	1.038	1	1	1	1.923	1	1	1	1	1
ERR3956125	PRJEB30077	Franssen et al., 2021	6380538	6298424	98.7131	5209620	81.6486	24	1	1.083	1.042	1	1.042	1.042	1.042	1	1.042	1.042	1.042	1.042	1.042	1.042	1.042	1	1.042	1.042	1	1.042	1.042	1	1	1.042	1	1	1	1.021	1	1	1.917	1	1	1	1	1
ERR3956126	PRJEB30077	Franssen et al., 2021	6943877	6880780	99.0913	5686715	81.8954	27	0.963	0.9259	1	0.963	1	1	0.963	1	0.963	1	1	1	1	1	0.963	1	1	1	1	1	1	0.963	1	1	1	1	1	1	0.963	1	1.889	1	1	0.963	1	1
ERR3956127	PRJEB30077	Franssen et al., 2021	6533191	6276062	96.0643	5204356	79.6603	24.75	0.9697	0.9697	1.01	0.9697	1.01	1.01	0.9697	1.01	1.01	0.9697	1.01	1.01	0.9697	0.9697	0.9697	1.01	1.01	0.9697	1.01	1.01	0.9697	0.9697	1.01	0.9697	0.9697	1.01	0.9697	0.9697	1.01	0.9697	1.899	0.9697	0.9697	0.9697	0.9697	0.9697
ERR3956128	PRJEB30077	Franssen et al., 2021	6025870	5961145	98.9259	4963208	82.365	23	1	1.043	1.043	1.043	1.043	1.043	1.043	1	1.043	1	1.065	1.043	1.043	1.043	1.043	1.043	1.043	1.043	1	1.022	1.043	1	1.043	1.043	1	1	1.043	1	0.9783	1	1.913	1	1	1	1	1
ERR3956129	PRJEB30077	Franssen et al., 2021	4102504	3965371	96.6573	3355089	81.7815	16	1	0.75	1	0.9375	0.9688	1	0.9375	1	1	0.9375	1	1	1	1	0.9375	1	1	1	1	1	1	0.9688	1	0.9375	0.9375	1	1	0.9375	0.9375	1	1.875	0.9375	0.9375	0.9375	0.9375	1
ERR3956130	PRJEB30077	Franssen et al., 2021	5343398	5012686	93.8108	4179414	78.2164	20	1	1	1	0.95	1	1	1	0.95	1.2	1	1	1	1	1	0.95	1	0.9875	1	0.95	1	0.975	1	1	1	1	1.05	0.95	0.95	0.95	0.95	1.8	0.95	0.95	0.95	0.95	0.95
ERR3956131	PRJEB30077	Franssen et al., 2021	6691588	6374396	95.2598	5297171	79.1616	24	0.9583	1	1	0.9583	0.9583	1	0.9583	1	1	0.9792	1	1	1	1.042	0.9583	1	1	1	1	1	0.9583	1	1	1	1	1	1.458	1	1	1	1.875	1	1.458	1	0.9583	1
ERR3956132	PRJEB30077	Franssen et al., 2021	7235435	7167395	99.0596	5908548	81.6613	28	0.9643	1.036	1	0.9643	1	1	1	1	1	0.9643	1	1	1	1	1	1	1	1	1	1	1	1	1	1	1	1	1	1	1	0.9821	1.857	0.9821	1	0.9643	0.9643	0.9643
ERR3956133	PRJEB30077	Franssen et al., 2021	6912482	6827221	98.7666	5656080	81.8242	27	0.963	1.037	1	1	1	1	1	1	1	1	1	1	0.963	0.963	1	1	1.037	1	1	1	0.963	1	1	1	0.963	1	0.963	0.963	0.963	0.963	1.852	0.963	0.963	0.963	0.963	0.963
ERR3956134	PRJEB30077	Franssen et al., 2021	8205211	7939687	96.764	6488518	79.078	30	0.9667	1	0.9667	0.9667	1	1	1	0.9667	1	1	1.033	1	1	1	0.9667	1	1	1.033	1	1	1	1	1	1	1	1	1	1	1	1	1.9	1	1	1	1	1
ERR3956135	PRJEB30077	Franssen et al., 2021	7369966	7224228	98.0225	5956117	80.8161	28	0.9286	0.9643	1	0.9643	0.9643	1	1	0.9643	1	1	1	1	0.9643	0.9643	0.9643	1	1	1	1	1	0.9821	1	1	1	1	1	1	1	0.9643	1	1.893	1	1	0.9643	1	1
ERR3956136	PRJEB30077	Franssen et al., 2021	7160376	7048664	98.4399	5812975	81.1825	27	0.963	1	1	1	0.963	1	1	1	0.963	0.963	1	1.037	1	1	1	1	1	1	1	1	1	0.963	1	1	1	1	1	1	1	1	1.926	1	1	1	1	1
ERR3956137	PRJEB30077	Franssen et al., 2021	6856108	6742450	98.3422	5576931	81.3425	26	0.9231	1	1	1	1	1	1	0.9615	1	1	1	1	1	1	1	1	1	1	1	1	1	1	1.038	1	1	1	1	1	1	1	1.885	1	1	1	1	1
ERR3956138	PRJEB30077	Franssen et al., 2021	7969959	7852445	98.5255	6419738	80.5492	30	1	1	1	1	1.033	1	1	0.9667	1	1	1.033	1	1.033	1	1	1	1	1	0.9667	1	1	1	1	0.9833	0.9667	1	1	0.9667	0.9667	1	1.733	1	1	0.9667	0.9667	1.167
ERR3956139	PRJEB30077	Franssen et al., 2021	8046518	7974541	99.1055	6458107	80.2596	31	1	1	1	1	1	1	1	0.9677	1	0.9677	1	1	1	1	1	1	1	1	0.9677	1	1	1	1	1	0.9677	0.9677	0.9839	0.9677	0.9677	0.9677	1.839	0.9677	1	0.9677	0.9677	0.9677
ERR3956140	PRJEB30077	Franssen et al., 2021	8115493	7895077	97.284	6469335	79.7159	30	0.9667	1.033	1.033	1	1	1.033	1.033	1	1	1.033	1.033	1.033	1	1	1	1.033	1.033	1.033	1.033	1.033	1	1	1.033	1	1	1	1	1	1	1	1.9	1	1	1	1	1
ERR3956141	PRJEB30077	Franssen et al., 2021	6632844	6526221	98.3925	5418892	81.6979	25	1	0.56	1.04	1	1.04	1.04	1	1	1.04	1.04	1.04	1.04	1	1.04	1	1.04	1.04	1.04	1	1	1.04	1	1.04	1.04	1	1	1	1	1	1	1.92	1	1.04	0.96	1	1
ERR3956142	PRJEB30077	Franssen et al., 2021	6409741	6368687	99.3595	5286223	82.4717	25	1	1	1	0.96	1	1	1	1	1	0.96	1.04	1	1	1	1	1	1	1	0.98	0.96	1	1	1	1	0.96	1	1	1	0.96	1	1.88	1	1	0.96	0.96	0.96
ERR3956143	PRJEB30077	Franssen et al., 2021	7577936	7521255	99.252	6146065	81.1047	29	0.9655	1.034	1.034	0.9655	1	1.034	1.017	1	1	1	1	1	1	1	1	1.034	1	1	0.9655	1	1	1	1	1	0.9655	1	1	1	1	1	1.862	0.9655	1	0.9655	0.9655	0.9655
ERR3956144	PRJEB30077	Franssen et al., 2021	6971442	6578735	94.3669	5467708	78.4301	26	0.9615	1	1	1	1	1	1.038	1	1	0.9615	1	1	1	0.9615	0.9615	1	1	1	0.9615	1	1	0.9615	1	1	0.9615	0.9615	0.9615	1	0.9615	0.9615	1.846	0.9615	1	0.9615	0.9615	0.9615
ERR3956145	PRJEB30077	Franssen et al., 2021	7158651	4383346	61.2315	3683509	51.4554	17	1.059	1	1.059	1	1	1	1	0.9412	1	1.471	1	1	1	1	0.9412	1	1	1	1	1	1	1	1	1	1	1	1	1	1	1	1.882	1	1	0.9412	0.9412	0.9412
ERR3956146	PRJEB30077	Franssen et al., 2021	6239952	6088078	97.5661	5068807	81.2315	24	0.9583	1	1.042	1	1	1	1	0.9583	1.042	1	1	1	1	1	0.9583	1	1	1	1	1	0.9583	1	1.042	0.9583	0.9583	1	1	0.9583	0.9583	1	1.875	0.9583	1	0.9583	0.9583	0.9583
ERR3956147	PRJEB30077	Franssen et al., 2021	5817407	5658113	97.2618	4722326	81.1758	22	0.9545	1.045	1.045	1	1	1	1	1	1	1.045	1.045	1.023	1.045	1.045	1	1.045	1	1.045	1	1.045	1.045	1	1.045	1	1	1	1	1	1	1	1.909	1	1	0.9545	0.9545	1
ERR3956148	PRJEB30077	Franssen et al., 2021	7276147	7094274	97.5004	5864815	80.6033	27	0.963	1.037	1	1	1	1	1.481	1	1	1.037	1.037	1.037	1	1.037	1	1	1	1.037	1	1	1	1	1.037	1	1	1	1	1	1	1.037	1.926	1	1	1	1	1
ERR3956149	PRJEB30077	Franssen et al., 2021	6315896	6238086	98.768	5014184	79.3899	24	0.9583	1	1	0.9583	1	1	1	1	1	1	1	1	0.9583	1	0.9583	1	1	1	1	1	0.9583	1	0.9792	1	1	1	0.9583	0.9583	0.9583	0.9583	1.875	0.9583	1	0.9583	0.9583	0.9583
ERR3956150	PRJEB30077	Franssen et al., 2021	7117836	6845633	96.1758	5652468	79.4127	26	1	1	1	1	1	1	1	1	1	1	1	1	1	1	1	1	1	1.038	1	1	1	1	1	1	1	1.038	1	1	1	1.038	1.923	1	1	1.038	1	1
ERR3956151	PRJEB30077	Franssen et al., 2021	6954525	6730970	96.7855	5588564	80.3587	26	0.9615	1	1	1	1	1	1	0.9615	1	1	1	1.038	1	1	0.9615	1	1	1.038	1.038	1	1	1	1	1	1	1	1	1	1	1	1.923	1.038	1	1	1	1
ERR3956152	PRJEB30077	Franssen et al., 2021	7996803	7957278	99.5057	6511315	81.424	31	1.065	1.032	1.032	1.032	1	1.032	1.032	1	1	1.032	1.032	1.032	1	1	1	1.032	1.032	0.9677	1	1.032	1	1	1.032	1	1	1	1	1	1	1	1.516	1	1	0.9677	0.9677	0.9677
ERR3956153	PRJEB30077	Franssen et al., 2021	6750299	6582270	97.5108	5461735	80.911	26	0.9808	1.038	1	1	1	1.019	1	0.9615	1	1	1	1.038	1	1	1	1.038	1	1.038	1.038	1	1	1	1.038	1	1	1	1.038	1	1	1	1.423	1	1	1	1	1
ERR3956154	PRJEB30077	Franssen et al., 2021	7205577	7083480	98.3055	5849155	81.1754	27	1	1.037	1.074	0.9815	1.111	1.028	1.407	0.963	1	1.074	1.037	1	1.037	1	1	1	1	1	1	0.963	1	1	1.037	1	1	1	1.037	1	0.963	1	1.852	1.037	1	0.963	0.963	0.963
ERR3956155	PRJEB30077	Franssen et al., 2021	6213146	6132562	98.703	4950417	79.6765	23	1	1.043	1	1	1.043	1	1	1	1	1.043	1.043	1	1.022	1	1	1.022	1	1	1	1	1	1	1	1	1	1	1	1	1	1	1.913	1	1	0.9565	1	1
ERR3956156	PRJEB30077	Franssen et al., 2021	7677033	7656462	99.732	6250885	81.4232	29	1.034	1.069	1.069	1.034	1.069	1.034	1.034	1	1.069	1.034	1.069	1.052	1.034	1.034	1.034	1.069	1.069	1.034	1	1.034	1.034	1	1.034	1.034	1	1.069	1	1	1	1	1.828	1	1	0.9655	0.9655	0.9655
ERR3956157	PRJEB30077	Franssen et al., 2021	8136926	8110152	99.671	6591601	81.0085	30	1	1	1.033	1	1	1.033	1.033	1	1.033	1	1.033	1	1.033	1	1	1.033	1	1	1	1	1.033	1	1.033	1	1	1	1.433	1	1	1	1.833	0.9667	1.467	0.9667	0.9667	0.9667
ERR3956158	PRJEB30077	Franssen et al., 2021	7657679	7315626	95.5332	6018171	78.59	28	0.9643	1.018	1.036	1	1	1	1	1	1	1	1	1.036	1	1	1	1.036	1	1.036	1.018	1	1	1	1	1	1	1	1	1	1	1	1.893	1	1.036	1	1	1
ERR3956159	PRJEB30077	Franssen et al., 2021	6051131	5973532	98.7176	4993397	82.5201	23	1	1	1	1	1	1	1.043	1	1	1	1.043	1.043	1	1	1	1	1	1	1.043	1	1	1	1	1	1	1	1.043	1	1	1	1.957	1	1	1	1	1
ERR3956160	PRJEB30077	Franssen et al., 2021	6629840	6594441	99.4661	5468228	82.479	26	0.9615	1.019	1	1	1	1	1	0.9615	1	1	1	1	1	1	1	1	1	1	1	1	1	0.9615	1	1	0.9615	1	1	1	1	1	1.846	0.9615	0.9615	0.9615	0.9615	0.9615
ERR3956161	PRJEB30077	Franssen et al., 2021	6720578	6704947	99.7674	5548933	82.5663	26	1	1	1.038	1	1.038	1	1	1	1.038	1	1.038	1	1	1	1	1.038	1	1	0.9615	1.154	1	0.9615	1	1	0.9615	1.154	0.9615	0.9615	0.9615	0.9615	1.923	0.9615	0.9615	0.9615	1.115	0.9615
ERR3956162	PRJEB30077	Franssen et al., 2021	7626491	7365375	96.5762	6026616	79.0221	28	0.9643	0.9643	1	1	1	1	1	1	1	1.018	1	1.018	1	1	1	1	1	1.036	1	1	1	1	1	1	1	1	1	1	1	1	1.893	1	1	1	1	1
ERR3956163	PRJEB30077	Franssen et al., 2021	6777942	6459704	95.3048	5353983	78.9913	25	0.96	1	1	1	0.96	1	0.96	0.96	1	1	1	1	0.96	1	1	0.96	1	1	1	0.96	1	0.96	1	1	0.96	1	1	0.96	1	1	1.88	1	1	1	1	1
ERR3956164	PRJEB30077	Franssen et al., 2021	6280174	6127917	97.5756	5078606	80.8673	24	1	1	1	1	1	1.042	1	1	1	1	1.021	1	1	1	1	1	1	1	1	1	1	1	1.021	1	1	1	1	1	0.9583	1	1.875	1	1	0.9583	1	0.9583
ERR3956165	PRJEB30077	Franssen et al., 2021	6100629	6044235	99.0756	5037237	82.5691	24	0.9583	1	1.042	0.9583	1	1	1	0.9583	1	1	1	1	1	1	1	1	1.042	1	0.9583	0.9583	1	1	0.9583	1	0.9583	0.9583	0.9583	1	0.9583	0.9583	1.833	0.9583	0.9583	0.9583	0.9583	0.9583
ERR4678129	PRJEB30077	Franssen et al., 2021	13466417	13344536	99.0949	10330633	76.714	47	1	1.021	1.043	1	1	1.021	1.447	1	1.021	1.064	1.021	1.021	0.9787	1	1	1.021	1	1	0.9787	1.021	1	0.9574	1.319	1	0.9787	0.9787	0.9787	0.9787	0.9787	0.9787	1.426	0.9787	0.9787	0.9574	0.9574	0.9574
ERR4678130	PRJEB30077	Franssen et al., 2021	11760419	8797008	74.8018	7027606	59.7564	31	1	1.065	1.065	1.032	1.032	1.032	1.097	1	1.032	1.097	1.032	1.032	1.032	1	1.032	1.032	1.032	1.032	1	1	1.032	1	1.032	1.032	1	1	1	1	1	1	1.871	1	1	0.9677	0.9677	0.9677
ERR4678131	PRJEB30077	Franssen et al., 2021	12644966	12532271	99.1088	9781183	77.3524	44	0.9773	1.023	1.045	1	1.023	1.023	1	1	1.023	1.023	1.045	1.023	1.023	1	1	1.023	1.023	1.023	1	1.023	1.023	1	1	1.023	1	1.045	1	1	1	1	1.432	1	1	0.9773	1	1
ERR4678132	PRJEB30077	Franssen et al., 2021	12293493	12112318	98.5263	9441153	76.798	42	1	1.071	1.095	1.024	1.024	1.024	1.452	1	1.024	1.31	1.048	1.024	1.024	1.024	1.024	1.024	1.024	1.012	1	1	1.024	1	1.238	1	1.024	1	1.048	1	0.9762	0.9762	1.417	0.9762	1	0.9762	0.9762	0.9524
ERR4678133	PRJEB30077	Franssen et al., 2021	14675292	14509661	98.8714	11042109	75.2429	51	1	1.039	1.059	1	1.02	1.029	1.02	0.9804	1.02	1	1.02	1.039	1.02	1	1.02	1.02	1.039	1.02	0.9804	1	1.02	0.9804	1	1	0.9804	1	0.9804	0.9804	0.9804	0.9804	1.431	0.9804	0.9804	0.9608	0.9608	0.9608
ERR4678134	PRJEB30077	Franssen et al., 2021	13614317	13385870	98.322	10371829	76.1833	48	1	1.042	1.042	1	1	1.021	1	0.9792	1.021	1.01	1.042	1.021	1	1	1	1.021	1.021	1	1	1	1	0.9792	1.021	1	1	0.9792	0.9792	0.9792	0.9792	0.9792	1.417	0.9792	0.9792	0.9583	0.9583	0.9583
ERR4678135	PRJEB30077	Franssen et al., 2021	12747267	12505476	98.1032	9720241	76.2535	44	0.9545	1	1.023	0.9773	0.9773	1.023	1	1	1	0.9886	1.023	1	1	1.023	1	0.9773	0.9773	1	0.9773	1	1	0.9773	1.023	0.9773	0.9773	1.023	0.9773	0.9773	0.9773	0.9773	1.795	0.9773	1.023	0.9773	1	1
ERR4678136	PRJEB30077	Franssen et al., 2021	10719280	10128101	94.4849	8024621	74.8616	36	1	1.028	1.056	1	1.028	1.028	1.444	0.9722	1.028	1.028	1.028	1.028	1	1	1.028	1.028	1.028	1.028	1.028	1	1	1	1	1	1	1	1	1	1	1	1.778	0.9722	1	0.9722	0.9722	0.9722
ERR4678137	PRJEB30077	Franssen et al., 2021	14926588	14569061	97.6048	11113812	74.4565	50	0.96	1	1.02	0.96	0.98	1	1.42	0.96	1	1.24	1	1	1	0.98	1	1	1	1	0.99	0.98	1	0.98	1	1	0.98	1.34	1.34	0.98	0.96	0.98	1.38	0.98	0.98	0.96	0.96	0.96
ERR4678138	PRJEB30077	Franssen et al., 2021	14449835	13987962	96.8036	10765646	74.5036	49	1	1.041	1.082	1	1.02	1.02	1.02	0.9796	1.02	1	1.051	1.031	1.02	1	1.02	1.02	1.041	1.02	1	1.02	1.02	0.9796	1.02	1.041	1	1.061	1	1	1	1	1.429	0.9796	1.02	0.9796	0.9592	0.9796
ERR4678139	PRJEB30077	Franssen et al., 2021	15731541	8511813	54.1067	6721544	42.7266	30	1	1.067	1.067	1	1.033	1.033	1.033	1	1.033	1.033	1.033	1.033	1.033	1	1	1.033	1.033	1.033	1.033	1.033	1.033	1	1.033	1.033	1	1	1	1	1	1	1.867	1	1.033	0.9667	1	1
ERR4678140	PRJEB30077	Franssen et al., 2021	11912893	8763097	73.5598	6998522	58.7475	31	1	1.032	1.065	1	1.129	1.032	1.452	1	1.032	1.194	1	1.032	1	1	1	1	1.032	1	0.9677	1	1	1	1	1	1	1	1	1	1	1	1.839	0.9839	1	0.9677	0.9677	0.9677
ERR4678141	PRJEB30077	Franssen et al., 2021	13488656	13194628	97.8202	10212011	75.7081	46	0.9565	1.011	0.9783	0.9783	0.9565	1	1.065	0.962	1	1	1.043	1.022	0.9783	1	0.9783	1.022	1	1.022	1	1	1	1	1.022	0.9783	0.9783	0.9783	1	1	1	1	1.804	1.011	1	0.9837	1	1
ERR4678142	PRJEB30077	Franssen et al., 2021	14830106	14158172	95.4691	10809568	72.8893	49	0.9592	1.02	1	0.9592	0.9592	0.9796	0.9796	0.9796	0.9796	0.9898	1.02	1	1	1	0.9796	0.9796	1	1.02	1	0.9796	0.9796	1	1	0.9796	0.9796	0.9796	1	1	1	1	1.816	1	1	1	1	1
ERR4678143	PRJEB30077	Franssen et al., 2021	14839917	10405165	70.1161	8084737	54.4797	36	1	1.028	1.028	1	1.028	1.028	1.028	1	1	1	1.028	1.056	1.028	1.028	1	1.021	1.028	1.028	1.014	1.014	1.028	1.028	1.028	1	1	1	1	1	1	1	1.861	1	1	0.9722	0.9722	0.9931
ERR4678144	PRJEB30077	Franssen et al., 2021	13450923	12883584	95.7822	9944512	73.9318	46	1	1.022	1.043	0.9783	1.022	1.022	1	1	1	1	1	1.022	1	0.9891	1	1	1	1	0.9891	1	1	0.9783	1.022	0.9783	1	1	1	1	1	0.9783	1.413	0.9783	0.9891	0.9783	0.9783	0.9565
ERR4678145	PRJEB30077	Franssen et al., 2021	16290476	15770499	96.8081	11845564	72.7147	54	1.019	1.046	1.056	1	1.037	1.037	1.019	0.9907	1.019	1.019	1.037	1.037	1.019	1	1.009	1.019	1.037	1.019	1.019	1	1	1.019	1.019	1.019	1	1	1	1	1	1	1.778	1	1	0.963	0.9815	0.9815

## Sheet: L. donovani Franssen_2020
Sample	BioProject	DOI	Parasite_stage	Species	Total_read_count	Mapped_reads	Mapped_Percentage	Mapped_Percentage_MapQ30	Used_perc	Genome_Coverage_Single_Copy	LdLV9_01_v1_pilon	LdLV9_02_v1_pilon	LdLV9_03_v1_pilon	LdLV9_04_v1_pilon	LdLV9_05_v1_pilon	LdLV9_06_v1_pilon	LdLV9_07_v1_pilon	LdLV9_08_v1_pilon	LdLV9_09_v1_pilon	LdLV9_10_v1_pilon	LdLV9_11_v1_pilon	LdLV9_12_v1_pilon	LdLV9_13_v1_pilon	LdLV9_14_v1_pilon	LdLV9_15_v1_pilon	LdLV9_16_v1_pilon	LdLV9_17_v1_pilon	LdLV9_18_v1_pilon	LdLV9_19_v1_pilon	LdLV9_20_v1_pilon	LdLV9_21_v1_pilon	LdLV9_22_v1_pilon	LdLV9_23_v1_pilon	LdLV9_24_v1_pilon	LdLV9_25_v1_pilon	LdLV9_26_v1_pilon	LdLV9_27_v1_pilon	LdLV9_28_v1_pilon	LdLV9_29_v1_pilon	LdLV9_30_v1_pilon	LdLV9_31_v1_pilon	LdLV9_32_v1_pilon	LdLV9_33_v1_pilon	LdLV9_34_v1_pilon	LdLV9_35_v1_pilon	LdLV9_36_v1_pilon
ERR205723	PRJEB2600	Franssen et al., 2020	Promastigote	L.donovani	46841036	45041802	96.1589	28038774	59.8594	64	0.9688	1.266	0.9688	1.047	1.281	1.25	1.281	1.328	1.297	0.9531	0.9688	0.9688	1.266	1.266	1.047	0.9688	0.9531	0.9844	0.9531	1.266	0.9688	0.9688	1.391	0.9531	0.9531	1.281	0.9531	0.9531	0.9531	0.9531	1.547	0.9531	1.266	0.9531	1.266	0.9531
ERR205724	PRJEB2600	Franssen et al., 2020	Promastigote	L.donovani	44849394	39504923	88.0835	25674245	57.2455	59	0.9576	1.051	0.9661	1.339	0.9661	1.271	0.9831	1.237	1.051	1.271	1.271	0.9831	0.9831	0.9831	0.9661	0.9831	0.9831	0.9831	0.9831	0.9746	0.9831	1.051	1.068	1.051	0.9661	1.203	0.9661	0.9661	1.322	0.9661	1.695	0.9661	1.271	0.9831	1	0.9661
ERR205726	PRJEB2600	Franssen et al., 2020	Promastigote	L.donovani	56349548	49299348	87.4885	30274813	53.7268	70	0.9857	1.3	1	0.9857	0.9857	1.3	1.286	1.286	0.9857	1	1.214	1.014	1.486	0.9857	1.257	0.9857	1	1	0.9857	1.014	1	1.286	1.286	0.9857	0.9857	0.9857	0.9714	0.9857	0.9857	0.9714	1.486	0.9714	1.271	0.9571	0.9571	0.9571
ERR205730	PRJEB2600	Franssen et al., 2020	Promastigote	L.donovani	22686323	21273086	93.7705	16057203	70.7792	48	0.9583	0.9792	0.9583	1.354	0.9583	1.104	0.9792	1.333	1.354	0.9583	1.292	0.9583	0.9792	1.354	0.9583	1.333	0.9792	0.9583	0.9583	1.354	0.9688	1.104	0.9792	0.9583	0.9583	1.479	0.9375	0.9375	1.042	0.9375	1.646	0.9375	1.271	0.9375	1.25	0.9167
ERR205731	PRJEB2600	Franssen et al., 2020	Promastigote	L.donovani	19234622	17652135	91.7727	13458356	69.9694	41	1.049	0.9756	0.9512	0.9512	1.171	1.22	0.9756	1.024	0.9756	0.9268	1.061	1	1.024	0.9512	1	1.024	1	1	0.9512	0.9512	0.9512	1.024	1.22	1.073	0.9756	0.9756	0.9268	0.9512	1.22	0.9512	1.829	0.9512	1.073	0.9512	1.22	0.9268
ERR205732	PRJEB2600	Franssen et al., 2020	Promastigote	L.donovani	23370449	21701930	92.8606	16227971	69.438	48	1.438	1.333	1.021	0.9375	0.9375	1.312	0.9583	0.9583	1.042	0.9583	0.9583	1.396	0.9583	1.375	1.062	1.021	0.9583	1.042	0.9583	1.167	0.9583	1.375	1.5	0.9583	1.021	1.208	0.9375	0.9583	0.9375	0.9375	1.688	0.9375	1.375	0.9375	1.333	0.9375
ERR205733	PRJEB2600	Franssen et al., 2020	Promastigote	L.donovani	17485411	16004318	91.5296	12362814	70.7036	37	1.189	1.459	1	0.973	1	1.216	1.243	1	1.216	1	1.216	1.216	1	1.162	1.378	0.973	1	1.027	0.973	1.189	1	1.135	1.432	0.973	0.973	0.973	0.973	0.973	0.973	0.9459	1.946	0.9459	0.9595	0.9459	1.324	0.9459
ERR205734	PRJEB2600	Franssen et al., 2020	Promastigote	L.donovani	23172925	15429689	66.585	12033279	51.9282	36	1.361	1.361	0.9722	0.9722	1.278	1.014	1.333	1.361	1.389	1	1	1.583	1	0.9722	1.194	1.181	1	1.194	0.9722	1.306	1	1.194	1.833	0.9722	0.9722	1.194	0.9722	0.9722	0.9722	0.9722	1.778	0.9722	0.9722	0.9722	1	0.9444
ERR205735	PRJEB2600	Franssen et al., 2020	Promastigote	L.infantum	19005421	18375331	96.6847	13784128	72.5273	41	1	1.707	0.9756	0.9512	0.9512	1.39	0.9756	1.293	1.366	0.9512	0.9756	0.9756	1.39	0.9756	1.22	0.9512	0.9756	1	0.9512	0.9512	0.9756	1.366	0.9756	0.9512	0.9512	0.9756	0.9512	0.9512	0.9512	0.9512	1.707	0.9512	1.366	0.9512	1.366	0.9512
ERR205736	PRJEB2600	Franssen et al., 2020	Promastigote	L.infantum	23851967	22216745	93.1443	16504297	69.1947	50	1.08	0.98	0.96	0.92	1	1.66	0.96	1.04	1.32	0.94	1.34	0.98	1.34	0.94	1	0.92	0.92	1.04	0.92	1.32	1.12	0.96	1.36	1.18	0.92	1.1	0.92	0.92	1.34	0.92	1.52	0.92	1.22	0.9	1.26	0.9
ERR205737	PRJEB2600	Franssen et al., 2020	Promastigote	L.infantum	27206305	24864439	91.3922	17559887	64.5435	53	0.9623	0.9811	0.9717	0.9623	1.009	1	0.9811	1.358	1.019	0.9623	1	0.9811	1.679	1.264	0.9811	1	0.9811	0.9811	0.9623	1.34	0.9811	1.321	1.34	0.9717	0.9623	1.34	0.9623	0.9623	1	0.9623	1.66	0.9811	0.9623	0.9575	1.321	0.9434
ERR205738	PRJEB2600	Franssen et al., 2020	Promastigote	L.infantum	25044432	22553473	90.0538	16420279	65.5646	51	0.9804	1.294	1.118	0.9804	0.9804	0.9804	1	1.078	1.098	0.9608	1	1	1.059	1.039	0.9804	1.314	0.9804	0.9804	0.9804	0.9804	0.9804	0.9804	1.314	0.9804	0.9608	1.098	0.9608	0.9804	0.9804	0.9608	1.667	0.9608	0.9804	0.9608	1.333	0.9608
ERR205739	PRJEB2600	Franssen et al., 2020	Promastigote	L.infantum	23418447	22650095	96.719	16319320	69.6857	52	1.423	1	1	0.6154	1.385	1	1	1.058	1.288	1	1.019	1.038	1.115	0.6154	1.019	1	1.038	1.038	0.9952	1.038	1.019	1	1.058	0.9808	0.9808	1.058	0.9423	0.9808	0.9615	0.9615	1.654	0.9808	1	0.9423	1.038	0.9423
ERR205741	PRJEB2600	Franssen et al., 2020	Promastigote	L.donovani	21289599	20095980	94.3934	15196694	71.3808	45	0.9556	0.9778	0.9778	1.361	0.9778	0.9778	1.378	1.356	1.378	0.9778	0.9778	0.9778	0.9778	0.9778	0.9556	0.9778	0.9778	0.9778	0.9778	0.9778	1.378	0.9778	1.733	0.9667	0.9556	0.9778	0.9556	0.9556	1.356	1.356	1.7	0.9556	1.356	0.9556	0.9556	0.9556
ERR205742	PRJEB2600	Franssen et al., 2020	Promastigote	L.donovani	21768696	20427398	93.8384	15524850	71.3173	49	1.02	1.041	1.02	1.041	1	1.061	1.061	0.9796	1	1	1.061	1.02	1.051	1.02	1	1	1.02	1.041	0.9796	0.9796	1.02	1	1.041	1	0.9898	1.02	0.9592	1	1.02	0.9592	1.673	0.9592	1	0.9592	1.02	0.9388
ERR205743	PRJEB2600	Franssen et al., 2020	Promastigote	L.donovani	21874283	20001879	91.4402	15106262	69.0595	47	1.021	1.064	1.043	1.064	1.011	1.064	1.074	1	1.021	1.021	1.043	1.021	1.021	1.021	1.021	1.021	1.043	1.021	1	1.021	1.021	1	1.064	1	1	1.021	0.9787	0.9787	1	0.9787	1.702	0.9787	0.9787	0.9574	0.9787	0.9574
ERR205744	PRJEB2600	Franssen et al., 2020	Promastigote	L.donovani	22950457	21747632	94.759	16426558	71.574	51	1.039	1.01	1.059	1.039	1.039	1.176	1.02	0.9804	1.098	1	1.02	1.059	1.098	1	1	1	1	1.02	1	0.9804	1	0.9804	1.02	1.078	0.9804	1	0.9608	0.9804	1.118	0.9608	1.667	0.9608	1	0.9412	1.275	0.9412
ERR205745	PRJEB2600	Franssen et al., 2020	Promastigote	L.donovani	21866386	20433727	93.4481	15505626	70.9108	46	1.239	1.141	1.261	1.391	1	1.761	1	1.261	1.391	1	1	1	1	1.022	1.37	0.9891	0.9783	1	0.9783	1.391	1	0.9783	1.261	0.9783	0.9783	1.391	0.9783	0.9783	1.196	0.9783	1.826	0.9783	1	0.9565	0.9783	0.9565
ERR205747	PRJEB2600	Franssen et al., 2020	Promastigote	L.donovani	19222310	17119805	89.0622	13160881	68.4667	40	1.025	1.025	1	1.375	0.975	1.025	1	0.975	1.4	1	1.125	1	1.4	0.975	1.375	1	1	1	0.9625	1.075	0.975	0.975	1.75	0.975	0.975	0.95	0.95	0.95	0.975	0.9375	1.7	0.95	0.95	0.925	1.3	0.925
ERR205748	PRJEB2600	Franssen et al., 2020	Promastigote	L.infantum	23369906	21490754	91.9591	16070037	68.7638	51	1.137	1.108	0.8039	1.098	1.451	1.608	1.127	1.137	1.118	0.8235	0.8431	1.118	0.8627	1.098	1.118	1.078	0.8039	0.8137	0.8039	1.353	1.098	0.8235	1.353	1.078	0.8039	1.118	0.7843	0.8039	1.078	0.7843	1.608	1.039	1.039	1.02	1.02	0.7647
ERR205749	PRJEB2600	Franssen et al., 2020	Promastigote	L.infantum	20496960	18674762	91.1099	14132808	68.9507	43	1.093	1.093	1.163	1.419	1.535	1.163	1.395	1.07	1.419	1.012	1.023	0.9884	1.047	0.9767	1.047	1	1.035	0.9767	1	1.326	1.07	1.233	1.395	1	1.326	1.302	0.9535	0.9302	0.9535	0.9302	1.698	0.907	1	0.907	0.8837	0.8837
ERR205750	PRJEB2600	Franssen et al., 2020	Promastigote	L.infantum	21156561	18410879	87.0221	13601461	64.2896	42	1.071	1.31	1.048	0.9524	1.071	1	1.357	1.357	1.381	1.071	1	0.9881	1.286	0.9524	1	0.9762	0.9762	0.9762	0.9524	1	0.9762	0.9524	1.333	1.024	0.9524	1.262	0.9286	0.9286	0.9524	0.9286	1.738	1.214	1.214	0.9048	0.9048	0.9048
ERR205751	PRJEB2600	Franssen et al., 2020	Promastigote	L.infantum	22023884	20518715	93.1657	15087121	68.5035	47	1.021	1	1	1	1	1	1	1	1.383	1	1.011	1	1	0.9787	0.9787	0.9787	1	0.9787	0.9787	1	1	0.9787	1	1	0.9787	1.362	0.9787	0.9574	0.9787	0.9574	1.702	0.9574	0.9574	0.9574	1.319	0.9574
ERR205752	PRJEB2600	Franssen et al., 2020	Promastigote	L.infantum	23070203	21742025	94.2429	15664832	67.9007	46	1.315	1.391	0.9783	0.9348	1.022	1.391	0.9783	1.022	1.37	0.9783	1	1	1	0.9565	1.326	0.9783	0.9783	1.37	0.9783	1.413	1	0.9783	1.717	0.9783	0.9565	1.348	0.9783	0.9783	0.9783	0.9783	1.478	0.9783	1	0.9783	1.37	0.9565
ERR205753	PRJEB2600	Franssen et al., 2020	Promastigote	L.donovani	15267994	14319295	93.7863	11392578	74.6174	33	1.121	1.091	0.9394	1	1.121	1.061	1.03	1	1.273	0.9697	1	1	1.182	0.9697	1.273	0.9697	0.9697	0.9697	0.9394	1.333	0.9697	1	1.485	0.9697	0.9697	1.182	0.9697	0.9697	0.9697	0.9697	1.758	0.9697	1.303	0.9394	1.182	0.9394
ERR205754	PRJEB2600	Franssen et al., 2020	Promastigote	L.donovani	13646001	13426359	98.3904	10727736	78.6145	31	0.9677	1.387	1	0.9677	1.387	1.806	1	1.387	1.419	1	1	0.9677	1	1	0.9677	1	1	1	1	0.9677	1.419	1	1.419	0.9677	0.9677	1.419	0.9677	0.9677	1.387	0.9677	1.774	0.9677	0.9677	0.9355	0.9677	0.9355
ERR205756	PRJEB2600	Franssen et al., 2020	Promastigote	L.donovani	15808244	15250359	96.4709	11991857	75.8582	34	1.265	0.8824	0.9118	0.9118	1.221	1.912	1.294	1.235	1.235	0.8824	0.9118	0.9265	1.265	1.294	0.8824	0.9118	0.9118	1.294	0.8824	1.294	1.235	1.294	2.265	0.9118	0.8824	1.265	0.8824	0.8824	1.265	0.8824	1.971	1.206	0.8824	0.8824	1.265	0.8824
ERR205757	PRJEB2600	Franssen et al., 2020	Promastigote	L.donovani	18570202	17589281	94.7178	12829086	69.0843	35	0.9143	1.371	0.9429	1.371	1.343	0.9714	1.371	1.343	1.371	0.9714	0.9714	1.743	0.9714	1.371	1.371	0.9714	0.9714	0.9714	0.9429	0.9714	0.9714	0.9714	1.771	0.9714	0.9429	1.371	0.9714	0.9429	0.9714	0.9643	1.714	0.9429	1.343	0.9429	0.9429	0.9429
ERR205758	PRJEB2600	Franssen et al., 2020	Promastigote	L.donovani	16285706	15447222	94.8514	11956709	73.4184	35	0.9714	1	0.9714	0.9857	0.9714	1	1	0.9714	1	1.029	1.029	1	1	1.029	1	1	1	1	1	1	1	1	1	1	1	1	1	1	1	1	1.771	1	1	0.9714	1.086	0.9714
ERR205759	PRJEB2600	Franssen et al., 2020	Promastigote	L.infantum	11914600	11488234	96.4215	8472089	71.1068	25	1	1	1	1	1	1	1	1	1	1.04	1.04	1	1.04	1	1.04	1	1	1.04	1.04	1	1.04	1.04	1.04	1	1	1.02	1	1	1	1.02	1.88	1	1	1	1	1
ERR205760	PRJEB2600	Franssen et al., 2020	Promastigote	L.infantum	20088596	19287088	96.0101	13996163	69.6722	40	1.375	0.95	0.95	0.925	0.95	0.975	0.95	1.7	0.95	0.95	1.375	0.975	1.45	0.95	1.45	0.95	0.95	0.95	0.95	1.325	0.95	0.975	1.45	0.95	0.925	1.375	0.95	0.925	0.975	0.925	1.65	0.925	1.2	1.15	1.3	0.925
ERR205761	PRJEB2600	Franssen et al., 2020	Promastigote	L.donovani	17377841	16305018	93.8265	12015157	69.1407	36	0.9722	1.083	0.9722	1.194	0.9722	1	0.9722	1.5	1.361	0.9722	1.361	0.9722	0.9722	0.9722	0.9722	1.333	0.9722	0.9722	0.9722	1.361	0.9722	0.9722	1.389	0.9722	0.9722	1.056	0.9722	0.9722	1.361	0.9444	1.722	0.9722	0.9722	0.9722	1.333	0.9444
ERR205763	PRJEB2600	Franssen et al., 2020	Promastigote	L.infantum	16767944	16191155	96.5602	12305058	73.3844	36	1.403	0.9444	0.9722	0.9444	0.9167	0.9444	0.9722	1.306	1.25	0.9444	0.9931	0.9722	1.333	0.9444	1.639	0.9444	0.9444	0.9722	0.9444	0.9444	0.9722	0.9444	1.389	0.9444	1.333	1	0.9722	0.9444	0.9444	0.9444	1.694	0.9444	1.333	0.9167	1.333	0.9444
ERR205765	PRJEB2600	Franssen et al., 2020	Promastigote	L.donovani	24522297	22773895	92.8701	16895418	68.8982	50	1.16	0.94	0.94	1.22	1.32	1.1	0.94	1.3	1.32	0.94	0.97	0.96	1.18	1.18	0.94	0.94	0.94	0.94	0.94	0.94	0.94	0.94	1.12	0.94	1.16	1.1	0.92	0.94	1.32	0.92	1.9	0.94	1.46	0.92	1.3	0.92
ERR205766	PRJEB2600	Franssen et al., 2020	Promastigote	L.donovani	26878224	24189260	89.9958	17473934	65.0115	51	1.02	1.039	1.059	1	1	1.02	1.02	0.9804	1.402	1	1.02	1.02	1.373	1.373	1.392	0.9804	0.9804	1	1	1.706	1	0.9804	1.98	0.9804	0.9804	1.353	0.9804	0.9608	1.078	0.9608	1.667	0.9608	0.9804	0.9608	0.9608	0.9608
ERR205768	PRJEB2600	Franssen et al., 2020	Promastigote	L.infantum	24265684	22941343	94.5423	16548698	68.198	52	1.115	1.115	1.038	1	0.9808	1.019	0.9615	1.019	1.135	0.9808	1.019	1.038	0.9808	0.9808	0.9808	0.9808	0.9808	0.9808	0.9615	1	1	0.9615	1.019	0.9808	1.212	1.077	0.9615	0.9615	0.9808	0.9423	1.654	0.9808	0.9615	0.9423	1.288	0.9231
ERR205770	PRJEB2600	Franssen et al., 2020	Promastigote	L.infantum	27543910	25688485	93.2638	18324280	66.5275	55	0.9818	1.327	1.273	0.9818	1.327	1.309	0.9818	1.018	1.636	0.9727	1	1	1.327	1.291	1.327	0.9818	0.9636	0.9636	1.291	1.345	0.9818	1.291	1	0.9636	0.9636	0.9818	0.9455	0.9636	1	0.9455	1.655	0.9455	0.9636	0.9455	1.309	0.9455
ERR205771	PRJEB2600	Franssen et al., 2020	Promastigote	L.infantum	18373977	16641076	90.5687	12577868	68.4548	39	0.9744	1.026	0.9744	0.9487	0.9744	1	1	0.9744	1.077	0.9744	1.026	1	1.128	1	1.026	0.9744	1	1	1	1.359	1	1.128	1.026	1	0.9744	0.9744	0.9744	0.9744	1	0.9744	1.744	0.9744	1	0.9487	1	0.9744
ERR205774	PRJEB2600	Franssen et al., 2020	Promastigote	L.infantum	23520974	21984820	93.469	15959444	67.852	48	0.9583	1.104	0.9792	1.271	0.9792	1.042	0.9583	1.521	1.292	1.208	1.312	1.021	1.302	0.9583	1.125	0.9375	0.9583	1.062	0.875	1.104	1.229	0.9583	1.583	1.208	0.9167	1.292	0.9062	0.9167	1.062	0.9167	2.104	1.208	0.9583	0.9167	1	0.8958
ERR205776	PRJEB2600	Franssen et al., 2020	Promastigote	L.infantum	21731392	20903740	96.1915	15463846	71.159	49	1.031	1.041	1.02	1	1.02	1.02	1.02	1.388	1.041	1	1.02	1.02	1.02	0.9796	1	1	1.01	1.02	0.9796	1	1	1.367	1.041	1	0.9796	1	0.9796	0.9796	1.02	0.9796	1.714	0.9796	0.9796	0.9796	0.9796	0.9592
ERR205777	PRJEB2600	Franssen et al., 2020	Promastigote	L.donovani	23485068	20945713	89.1874	15722043	66.9449	50	0.77	0.84	0.84	1.2	0.92	0.92	0.96	0.92	0.94	0.96	0.98	0.96	0.98	0.96	0.94	0.98	0.98	1	0.99	0.98	0.98	1	1	1	0.98	1	1	1	1.02	1	1.7	1.02	1.02	1	1.02	1
ERR205778	PRJEB2600	Franssen et al., 2020	Promastigote	L.donovani	20744777	19542021	94.2021	14700081	70.8616	44	1.409	1.114	1	0.9773	0.9773	1	0.9773	0.9773	1.386	0.9773	1	0.9773	0.9773	1.324	0.9773	1	0.9773	1	0.9773	1.364	0.9773	0.9773	1.386	0.9773	1	0.9773	0.9545	0.9773	0.9773	0.9773	1.727	0.9773	1.364	0.9545	1.614	0.9545
ERR205780	PRJEB2600	Franssen et al., 2020	Promastigote	L.infantum	31996102	31942807	99.8334	21722160	67.89	66	0.9545	0.9848	0.9545	0.9394	1.485	0.9697	1.03	1.136	1.246	0.9697	1.015	0.9848	1	0.9848	1.015	1	0.9848	0.9697	0.9697	1.045	0.9545	0.9394	1.924	0.9697	0.9545	1.053	1.167	0.9545	1.167	0.9697	1.818	0.9545	1.227	0.9545	0.9545	0.9545
ERR205781	PRJEB2600	Franssen et al., 2020	Promastigote	L.infantum	26803721	26665300	99.4836	18914152	70.5654	53	0.9623	0.9245	0.9811	0.9434	1.245	1.925	1.566	1.472	1.283	0.9245	1.151	0.9245	1.594	1.264	1.509	1.415	1.198	0.9245	0.9057	1.868	1.264	0.9057	1.472	1.245	0.9057	1.264	0.9057	0.9057	1.283	0.9057	1.868	0.9057	1.302	0.8868	0.9057	0.9057
ERR205782	PRJEB2600	Franssen et al., 2020	Promastigote	L.infantum	17919724	17889328	99.8304	13413487	74.8532	39	0.9487	0.9744	0.9744	1.333	1.487	0.9744	1.051	1.667	1.359	0.9487	0.9744	0.9487	1.026	1.346	1.026	0.9744	0.9487	0.9744	0.9487	1.103	0.9744	0.9231	1.897	0.9487	0.9744	1.333	1.179	0.9295	1.026	1.026	2.179	0.9231	1.333	0.9231	0.9231	0.9231
ERR205785	PRJEB2600	Franssen et al., 2020	Promastigote	L.infantum	9294409	8599944	92.5281	6725505	72.3608	20	0.95	0.95	1.1	0.9	1.2	1.15	0.95	1.15	1.35	0.95	1.15	1.15	1.35	0.95	1.2	1.2	1.2	1.2	0.9	1.35	0.95	1.1	1.35	0.9	0.95	1.4	0.95	0.95	0.95	0.9	1.75	0.95	0.9	0.9	1.1	0.9
ERR205786	PRJEB2600	Franssen et al., 2020	Promastigote	L.infantum	19223175	17522190	91.1514	13189975	68.615	40	0.925	0.9625	0.975	0.925	0.95	0.95	0.9375	1.238	0.975	0.9375	0.975	0.95	0.9625	0.95	1.25	0.95	1.2	0.975	0.95	0.975	0.95	1.2	1.25	0.95	0.95	0.925	0.95	0.925	1.25	0.925	1.675	1.2	0.95	0.925	1.25	0.925
ERR205787	PRJEB2600	Franssen et al., 2020	Promastigote	L.infantum	10413280	8861917	85.1021	7342420	70.5102	22	1.364	0.9545	0.9545	0.9545	1.182	1.091	1.045	1.364	1.182	0.9545	0.9545	0.9545	1.091	0.9545	0.9545	1.045	0.9545	1.182	0.9091	1.091	1	1.091	1.068	1.136	1	1.227	0.9091	0.9545	1.045	0.9091	1.727	0.9545	1.364	0.9091	1.318	0.9091
ERR205788	PRJEB2600	Franssen et al., 2020	Promastigote	L.infantum	10595560	10133250	95.6368	7966518	75.1873	24	1.292	1.167	0.9167	0.875	0.875	1.125	0.9583	1.292	1.042	0.9167	0.9583	0.9583	1.292	0.9583	1.208	0.9167	0.9167	0.9583	0.9167	0.9167	0.9167	0.9167	1.125	0.9167	0.9583	1	0.9167	0.9167	0.9583	0.9167	1.75	0.9167	1.375	0.9167	1.375	0.9167
ERR205789	PRJEB2600	Franssen et al., 2020	Promastigote	L.donovani	28059370	26454012	94.2787	18959897	67.5706	61	1.066	1.131	0.8033	1.131	1.344	0.8033	1.082	1.131	0.8033	0.8033	1.131	1.098	1.115	1.098	1.115	0.8197	0.8197	0.8525	0.8033	1.082	0.8197	1.131	1.148	1.082	0.8033	0.8197	0.8197	0.8197	0.8197	0.8197	1.41	1.082	1.361	0.8197	1.148	1.082
ERR205790	PRJEB2600	Franssen et al., 2020	Promastigote	L.donovani	27256763	24813318	91.0354	17911635	65.7145	51	1.324	1.941	0.9412	0.9216	0.9216	1.098	1.314	1.471	1.314	1.029	1.333	0.9608	1.882	0.9412	1.412	1.176	0.9412	0.9412	0.9216	1.49	0.9412	1.627	1.765	0.9216	0.9216	1.157	0.9216	0.902	1.294	0.9216	1.863	0.9216	1.255	0.902	1.255	0.902
ERR205791	PRJEB2600	Franssen et al., 2020	Promastigote	L.donovani	19831889	16773927	84.5806	13161138	66.3635	40	1.35	1	1	0.975	1	1	1	0.975	1.15	0.95	0.975	0.9625	0.975	1.325	1.375	1	1	0.95	0.95	1.35	1	0.95	1.375	0.975	0.95	1.375	0.95	0.95	0.95	0.95	1.7	0.95	1.325	0.95	0.975	0.95
ERR205792	PRJEB2600	Franssen et al., 2020	Promastigote	L.donovani	30095402	28458504	94.561	20092390	66.7623	61.5	1.236	0.8618	0.8618	0.878	1.154	1.512	1.187	1.138	1.024	0.8455	1.024	1.008	1.154	1.154	1.008	0.8618	0.8618	1.171	0.8537	1.187	1.187	1.447	1.919	1.041	0.8618	1.187	0.8455	0.8455	1.008	0.8455	1.593	0.9919	0.8455	0.8293	1.138	0.9756
ERR205793	PRJEB2600	Franssen et al., 2020	Promastigote	L.infantum	28778004	27323193	94.9447	19265383	66.9448	59	0.8814	1.212	0.9831	0.8983	1.051	1.051	0.9322	0.9661	1.271	1.017	1.22	1.025	1.347	1.017	1.254	1.017	0.9661	1	0.8983	1.203	1.407	1.254	1.271	0.9831	0.9915	1	0.8983	0.8983	1.186	0.8983	1.814	0.9322	0.8983	0.8814	1.136	0.8814
ERR205795	PRJEB2600	Franssen et al., 2020	Promastigote	L.infantum	24141678	21755477	90.1158	16005867	66.2997	48	0.875	1.021	0.9375	0.8958	1.208	1	0.9583	1.438	1.021	1.292	1.042	1.021	1.458	1.125	0.9479	0.9531	0.9375	0.9375	0.9583	1.354	0.9583	0.9792	1.312	0.9792	1.042	0.9792	0.9375	0.9271	1	0.9375	1.656	1.167	0.9375	0.9167	1.292	0.9167
ERR205797	PRJEB2600	Franssen et al., 2020	Promastigote	L.infantum	35179971	31600733	89.8259	19281976	54.8095	63	1.183	1.032	1.254	1.016	1.095	1.032	1.032	1.016	1.254	1	0.9921	1.048	1.317	0.9683	0.9921	1	1	0.9762	1.016	1.238	1	0.9841	1.206	0.9683	0.9841	1.198	0.9524	0.9365	0.9524	0.9524	1.524	0.9524	1.032	0.9365	1.032	0.9365
ERR205799	PRJEB2600	Franssen et al., 2020	Promastigote	L.infantum	18958641	17971459	94.793	13648150	71.9891	40	1.225	1.275	0.925	0.9	1.2	1	0.925	1.25	1.625	0.925	1.025	1.2	1.325	0.925	1.05	0.925	0.9375	1	0.95	1.3	0.95	0.925	1.125	0.925	0.925	1.4	0.925	0.925	1.125	0.95	1.925	0.925	1.075	0.925	1.325	0.925
ERR205800	PRJEB2600	Franssen et al., 2020	Promastigote	L.infantum	29729167	27698164	93.1683	19441019	65.3938	61	0.9836	1.23	0.9672	0.9508	1.18	1.164	0.9344	1.361	1.164	1.131	1.18	0.9672	0.9672	0.9344	0.9344	0.9508	0.7213	0.9508	0.918	1.148	0.9508	0.918	1.016	0.9344	0.9098	1.131	0.918	0.918	1.139	0.918	1.852	0.9016	1.164	0.8852	1.115	1.066
ERR230187	PRJEB2600	Franssen et al., 2020	Promastigote	L.infantum	24338892	23049206	94.7011	16878056	69.346	51	1.216	0.9804	0.9804	0.9608	0.9706	0.9804	1	1.039	1.039	0.9804	1	1	1	0.9902	1	1.373	1	1	0.9804	1.353	0.9804	0.9804	1.706	0.9804	0.9804	1.314	0.9804	0.9804	0.9804	0.9804	1.686	0.9804	0.9804	0.9608	1.333	0.9608
ERR230188	PRJEB2600	Franssen et al., 2020	Promastigote	L.infantum	40840303	36135840	88.4808	20278965	49.6543	63	1.286	1.048	1.079	1.024	1.317	1.143	1.016	1.103	1.119	1.19	0.9841	1	1	1.032	1.349	1.325	1.008	0.9524	0.9841	1.405	0.9841	1.365	1.603	1.079	0.9683	0.9524	0.9206	0.9365	1.048	0.9206	1.73	0.9048	0.9365	0.8889	1.159	0.8889
ERR230189	PRJEB2600	Franssen et al., 2020	Promastigote	L.infantum	36823386	36775269	99.8693	24005414	65.1907	73	0.9726	0.9863	0.9863	0.9863	1.575	0.9863	0.9863	1.973	1.247	0.9863	1.014	1.007	1.308	0.9726	0.9726	1.301	0.9863	1.068	0.9589	1.329	0.9863	1.068	1.082	0.9726	0.9726	1.301	0.9589	0.9589	0.9863	0.9589	1.575	0.9658	1.301	0.9315	0.9452	0.9452
ERR230190	PRJEB2600	Franssen et al., 2020	Promastigote	L.infantum	30646550	30609932	99.8805	20864438	68.0809	63	1.032	1.016	1.016	1.016	1.651	1.016	0.9841	2.159	1.302	1.016	1.032	1.032	1.333	0.9683	0.9841	1.349	0.9841	1	0.9524	1.365	1	1.032	1.079	0.9841	0.9683	1.302	0.9524	0.9683	0.9683	0.9683	1.651	0.9524	1.317	0.9365	0.9365	0.9524
ERR230193	PRJEB2600	Franssen et al., 2020	Promastigote	L.infantum	35870321	35829014	99.8848	23473489	65.4399	71	1.352	1.028	1.359	1.014	1.007	1.014	1.014	1.634	1.366	1.014	1.021	1.028	1.352	1	1	1.634	1	1	0.9859	1	1	0.9859	1.352	1	1.169	1.338	0.9718	0.9718	1.239	0.9718	1.606	0.9718	0.9718	0.9577	0.9437	0.9437
ERR230194	PRJEB2600	Franssen et al., 2020	Promastigote	L.infantum	28358555	28282948	99.7334	19833174	69.9372	58	1.328	1.707	1.017	1	1.707	1.017	1	1.69	1.379	1.017	1.017	1.414	1.362	1	1.397	1	1.017	1	0.9914	1.034	1.009	1.328	1.379	1	1.672	1.362	0.9655	0.9828	0.9828	0.9655	1.672	0.9655	0.9828	0.9483	0.9483	0.9483
ERR304752	PRJEB2600	Franssen et al., 2020	Promastigote	L.infantum	14813567	14793267	99.863	10896841	73.5599	33	1.121	1.03	1.061	1.455	0.9697	1	1.03	1.424	1.455	1	1.03	1.03	1.409	0.9848	1.03	1.364	0.9697	0.9697	1	1.424	1	1.091	1.061	1	1.303	1.03	1	0.9697	1	0.9697	1.758	0.9697	0.9697	0.9394	0.9697	0.9697
ERR304753	PRJEB2600	Franssen et al., 2020	Promastigote	L.infantum	11826593	11799899	99.7743	9241977	78.1457	28	1.179	1.5	1.393	0.8929	1.25	0.8929	1.25	1.821	1.321	0.9286	1.321	1	1.286	0.8929	1.036	0.8929	0.8929	1.214	0.8929	1.304	0.8929	1.393	1.679	0.9286	0.8929	1.321	0.8929	0.8929	0.8929	0.8929	1.571	1.143	0.8929	0.8929	0.8571	1.107
ERR524883	PRJEB2600	Franssen et al., 2020	Promastigote	L.infantum	9607987	7834168	81.5381	6589413	68.5827	30	0.9333	0.9667	0.9667	0.9667	0.9667	0.9667	1	1	0.9667	0.9667	1	1	0.9667	1	0.9667	0.9667	0.9833	1	0.9667	1	0.9667	1	1	0.9667	1.033	1	1	1	0.9667	1	1.767	1	1	1	1	1
ERR271200	PRJEB2724	Franssen et al., 2020	Promastigote	L.infantum	17548975	14477378	82.497	10184005	58.0319	27	1.13	1.444	1.074	1.556	1.037	1.556	1.037	1	1.037	1.074	0.963	1.148	1.046	0.963	1.481	1	1	1	0.963	0.963	1	1.111	0.963	1.407	0.9815	1.407	0.9259	0.9259	0.963	0.8889	1.704	0.9259	0.9259	0.8889	1.296	0.8889
ERR539732	PRJEB2724	Franssen et al., 2020	Promastigote	L.infantum	20787604	19452117	93.5756	14205666	68.3372	44	0.9318	1	0.9773	0.9773	0.9545	1.318	0.9773	1	1.023	0.9773	1.409	1	0.9716	0.9773	1.341	1	0.9773	1	0.9545	1.205	0.9773	0.9545	1.386	0.9773	0.9773	0.9773	0.9773	0.9773	0.9773	0.9545	1.318	0.9545	0.9545	0.9318	1.295	0.9318
ERR539733	PRJEB2724	Franssen et al., 2020	Promastigote	L.infantum	20157242	19307196	95.7829	14218140	70.5361	42	1.167	0.881	0.869	0.8571	1.524	0.9524	0.881	1.81	1.167	0.881	1.262	1.31	1.286	1.143	0.881	0.9048	0.9048	1.238	0.9048	0.9048	1.167	1.19	1.857	0.9286	0.881	1.262	0.9048	0.9048	0.9167	0.9048	1.619	0.9048	1.214	0.9048	0.9048	1.167
ERR539734	PRJEB2724	Franssen et al., 2020	Promastigote	L.infantum	18594155	16155812	86.8865	10682668	57.4517	32	1.094	1	0.9062	0.9375	0.9375	1.062	0.9688	0.9375	0.9688	0.9375	1.219	0.9688	1.156	1	1	0.9688	0.9688	0.9688	0.9375	1.188	1	0.9688	1.406	0.9688	0.9688	1.375	0.9688	0.9688	0.9688	0.9688	1.375	0.9688	0.9688	0.9688	1.312	1
ERR539735	PRJEB2724	Franssen et al., 2020	Promastigote	L.infantum	17386250	16617991	95.5812	12892210	74.1518	39	0.9487	0.9872	0.9744	1	1	1	1	1.282	1.038	0.9744	1.026	1.026	1.026	1.179	1	1	1.026	1.026	1	1.026	1	1.026	1.026	0.9744	1	1.41	1	1	1	1	1.744	1	0.9744	0.9936	0.9744	0.9744
ERR539736	PRJEB2724	Franssen et al., 2020	Promastigote	L.infantum	18924113	17774559	93.9254	13158692	69.534	40	1.012	0.975	0.95	0.95	0.95	1.35	0.975	0.925	0.975	0.95	1.4	1.025	0.975	0.975	1.35	0.975	0.9812	0.975	1	1.125	0.975	0.975	1.375	0.975	1	0.975	0.95	0.975	0.95	0.975	1.4	0.95	0.975	0.95	1.35	0.95
ERR018835	PRJEB8947	Franssen et al., 2020	Promastigote	L.donovani	32582264	29433992	90.3375	20148751	61.8396	45	0.8222	0.8889	0.8667	0.8889	1.222	0.8667	0.9111	0.9056	1.244	0.9222	0.9778	0.9333	1.011	0.9333	0.9111	1.267	0.9333	0.9778	0.9556	0.9333	0.9167	0.9556	1.311	0.9333	0.9333	1.267	0.9556	0.9556	0.9556	0.9556	1.6	0.9778	1.289	0.9778	1.356	0.9778
ERR019524	PRJEB8947	Franssen et al., 2020	Promastigote	L.donovani	26644956	23384531	87.7634	15847560	59.4768	31	0.4677	0.5806	0.5484	0.7097	0.9032	0.8065	0.7742	0.6774	1.032	0.7742	0.9032	0.871	1.032	0.9032	0.7419	1.129	0.7742	0.9355	0.8871	0.8065	0.8065	0.9677	1.323	0.8065	0.8387	1.21	1	0.9677	0.9677	0.9677	1.645	1.065	1.032	1	1.419	1.032
ERR206373	PRJEB8947	Franssen et al., 2020	Promastigote	L.donovani	26198769	25150195	95.9976	18297215	69.84	55	0.9455	0.9818	0.9636	1.036	1.345	1.255	1.109	0.9455	1.345	0.9636	0.9818	0.9636	1.327	0.9636	1.055	1.345	0.9818	0.9636	0.9636	0.9636	0.9818	1.073	1.364	0.9818	0.9636	1.345	0.9636	0.9636	0.9636	0.9636	1.636	1.055	1.091	0.9455	1.327	0.9455
ERR018830	PRJEB2086	Imamura et al., 2016	NA	L.donovani	26817101	19880506	74.1337	14356331	53.5342	31	0.6129	0.6774	0.9355	0.7097	0.9677	0.6774	1.016	1.032	1.065	0.7742	0.871	0.8387	1.129	1.194	0.7419	0.8387	0.8065	0.8387	0.8387	0.8226	0.8065	0.871	1.581	0.8065	0.8065	1.194	0.9032	0.9032	0.9032	0.9032	1.581	1.258	1.258	0.9032	1.323	0.9355
ERR206300	PRJEB2086	Imamura et al., 2016	NA	L.donovani	35767336	29951271	83.7392	20484087	57.2704	46	0.9565	0.9565	0.9783	0.9565	0.9565	1.326	1.326	0.9348	1.326	0.9565	1	0.9891	0.9783	0.9565	0.9565	1.326	0.9783	0.9565	0.9565	1.326	0.9783	0.9565	1.337	0.9565	0.9565	0.9565	0.9457	0.9565	0.9565	1.304	1.587	1.283	1.304	0.913	1.261	0.913
ERR206301	PRJEB2086	Imamura et al., 2016	NA	L.donovani	9006194	8123776	90.2021	6726738	74.6901	15	1.333	1	1	1	1.4	1	1	0.9333	1.4	0.9333	1	1	1.4	0.9333	1.4	1	1	1	1	1	1	1	1.467	1	1	1.467	1	1	1	1	1.867	1	1.467	1	1	1
ERR206308	PRJEB2086	Imamura et al., 2016	NA	L.donovani	13511843	12986682	96.1133	10210761	75.569	24	1.042	1.083	1.083	1.042	1.042	1.083	1.042	1.021	1.042	1.042	1.042	1.083	1.042	1.042	1.042	1.042	1.042	1.042	1.042	1.042	1.042	1	1.458	1.042	1	1.042	1	1	1	1	1.833	1	1	0.9583	0.9583	0.9583
ERR206322	PRJEB2086	Imamura et al., 2016	NA	L.donovani	17193151	16339099	95.0326	12656398	73.613	29	1.034	1.069	1.034	1	1.448	1.034	1.034	1.414	1.448	1	1.034	1	1	1	1.017	1	1	0.9655	0.9655	1	1	1.759	1.379	0.9655	0.9655	1.379	0.9655	0.931	0.9655	0.931	1.69	0.9655	0.9655	0.931	1.276	0.8966
ERR206329	PRJEB2086	Imamura et al., 2016	NA	L.donovani	9139140	8814555	96.4484	7238220	79.2002	17	0.9412	1.029	1	1	1	1	1	1.412	1	1	1.059	1.059	1	1	1	1	1	1	1	1	1	1	1	1	1	1	1	1	1	1	1.882	1	1	1	1	1
ERR206350	PRJEB2086	Imamura et al., 2016	NA	L.donovani	18494397	18061218	97.6578	13656568	73.8417	33	1.061	1.03	0.9394	1.152	1	1	0.9697	0.9394	1.03	0.9697	1	1	1.03	1	0.9697	0.9697	0.5758	1	0.9697	1.061	0.9697	1.03	0.9697	0.9394	0.9697	0.9697	0.9394	0.9394	1	0.9697	1.697	0.9697	1	0.9394	1.303	0.9697
ERR206354	PRJEB2086	Imamura et al., 2016	NA	L.donovani	14437240	13807458	95.6378	10865252	75.2585	33	0.9394	0.9697	0.9697	0.9697	1.303	0.9697	0.9697	1.333	1.03	0.9697	1.394	1	0.9697	1.333	0.9697	1.03	1	0.9697	0.9394	0.9697	0.9697	0.9697	1.03	0.9697	0.9394	0.9697	0.9394	0.9394	0.9697	1.03	1.727	0.9394	1.364	0.9394	1.364	0.9394
ERR206375	PRJEB2086	Imamura et al., 2016	NA	L.donovani	21067356	19415100	92.1573	14544956	69.0403	42	0.9286	0.9524	0.9524	0.9405	0.9524	0.9524	1.381	1.31	1.357	0.9524	1.738	1.357	0.9524	1.333	1.357	1.381	0.9762	0.9524	0.9286	1.333	0.9524	1.357	2.048	1.333	0.9524	0.9524	0.9286	0.9524	0.9524	0.9524	1.667	0.9524	1.333	0.9286	0.9286	0.9286
ERR206395	PRJEB2086	Imamura et al., 2016	NA	L.donovani	21826297	18635731	85.382	13908203	63.7222	41	0.9756	0.9512	1.39	0.9512	1.366	0.9756	1.366	1.341	1.366	0.9512	0.9756	0.9634	1.39	1.341	0.9512	0.9756	0.9756	0.9512	0.9512	0.9512	0.9512	0.9512	1.707	0.9512	0.9268	1.341	0.9268	0.9268	0.9268	0.9268	1.634	1.317	1.317	0.9268	1.317	0.9268
ERR206397	PRJEB2086	Imamura et al., 2016	NA	L.donovani	17761312	16156177	90.9627	12440523	70.0428	38	0.9474	0.9737	1	1.395	1.395	0.9737	1	1.368	0.9737	0.9737	0.9737	1	1	0.9474	1.368	0.9737	0.9737	0.9737	0.9737	0.9737	0.9737	0.9737	1.395	0.9737	0.9605	0.9737	0.9737	0.9737	0.9737	0.9737	1.737	1.368	1.395	0.9737	0.9737	0.9737
ERR206418	PRJEB2086	Imamura et al., 2016	NA	L.donovani	14414911	12339063	85.5993	9850634	68.3364	29	1.034	1.034	0.9655	1	1.138	0.9483	1.103	0.9655	1.138	1	1.103	1	0.9655	1.034	0.9655	1.103	0.9655	0.931	0.9655	1.138	1.069	0.9655	1.069	0.931	0.9655	1.103	0.9655	0.9655	0.931	0.931	1.862	1	1.138	0.931	0.931	0.9655
ERR206450	PRJEB2086	Imamura et al., 2016	NA	L.donovani	26026995	24970937	95.9424	17820229	68.4682	56	1	1.107	0.9911	0.9821	1.089	1	0.9821	1.054	1.018	1	1.018	1.036	1	1.009	0.9821	1.018	1.018	1	1	1.089	1.018	0.9911	1.036	0.9821	0.9821	1	1	1	1	0.9821	1.679	1	1	0.9821	0.9821	0.9821
ERR206455	PRJEB2086	Imamura et al., 2016	NA	L.donovani	35769748	32505207	90.8735	20613774	57.6291	67	1	1.015	1.015	1	1	1.03	1	1	1.015	1.015	1.015	1.022	1.015	1	1	1.015	1.015	1.015	1	1	1.015	1	1.015	1.015	1.011	1.015	1	1	1	1	1.604	1	1.015	1	0.9851	1
ERR206471	PRJEB2086	Imamura et al., 2016	NA	L.donovani	17323530	16680551	96.2884	12876120	74.3273	40	1.012	0.975	0.95	0.975	1.05	0.975	1.05	0.975	1.075	0.975	1.05	1.05	0.975	1.025	0.975	1.05	1	0.95	0.975	1.075	1	1	1.025	0.975	0.975	1.062	0.975	0.975	0.95	1	1.8	1	1.075	0.975	0.975	0.975
ERR206473	PRJEB2086	Imamura et al., 2016	NA	L.donovani	31132159	27943700	89.7583	19794321	63.5816	63	0.9683	1.016	0.9841	0.9921	1	1	0.9841	1.048	1.016	1.016	1	1	1	0.9841	1	1.016	1	1	1.016	1.032	1	1	1	1	1	1	1	1	1	0.996	1.659	1	1	1	1.016	1
ERR206485	PRJEB2086	Imamura et al., 2016	NA	L.donovani	13066966	12901933	98.737	10326006	79.0238	32	1	1.031	1	1	1.031	1.031	1.031	1	1	1.031	1.031	1.062	1	1	1	1	1.031	1.031	1.031	1	1	1	1.031	1	1	1	1	1	1	1	1.844	1	1	1	1	1
ERR206490	PRJEB2086	Imamura et al., 2016	NA	L.donovani	17751712	16814851	94.7224	12763814	71.9019	38	1.053	1.013	1.026	1	1.421	1.026	1	1.395	0.9737	1.026	1	1.421	1	1.368	1	1	1	1	1	1.395	0.9737	0.9737	1.368	0.9737	0.9737	1.026	0.9737	0.9737	0.9737	0.9737	1.737	0.9737	1.395	0.9737	0.9474	0.9474
ERR206499	PRJEB2086	Imamura et al., 2016	NA	L.donovani	23949835	23735747	99.1061	17445512	72.8419	52	1.673	1.365	0.9808	1.346	1	1.385	0.9808	1.596	1.365	0.9808	1	0.9808	0.9904	1.058	0.9808	0.9615	0.9808	0.9808	0.9615	1.442	0.9808	1.077	1.615	0.9615	0.9615	1.673	0.9423	0.9615	0.9615	0.9423	1.654	0.9615	0.9615	0.9423	1.308	0.9423
ERR206503	PRJEB2086	Imamura et al., 2016	NA	L.donovani	23502032	22754351	96.8187	16454751	70.0142	51	1.02	1.255	0.9412	1.392	0.9804	0.9804	0.9804	1.353	1.098	0.9804	1	0.9804	1	1	0.9804	0.9608	0.9608	1.039	1.216	1.118	0.9608	1.118	1.588	0.9608	0.9608	1.02	0.9608	0.9608	0.9608	1.078	1.863	1.118	1	0.9608	1.25	0.9608
ERR206504	PRJEB2086	Imamura et al., 2016	NA	L.donovani	24364491	23914809	98.1544	17608559	72.2714	58	0.8017	1.362	1.069	1.345	1.086	0.8276	0.9483	1.034	1.086	0.7759	1.052	0.8103	1.31	0.8621	1.052	0.7931	0.7759	1.086	1.086	1.328	0.7931	0.8103	1.086	1.034	0.7759	1.069	0.7759	1.034	1.052	0.9655	1.397	1.19	1.121	0.7414	1.052	0.8966
ERR206505	PRJEB2086	Imamura et al., 2016	NA	L.donovani	21898840	21502791	98.1915	15920053	72.6982	50	0.96	0.98	0.97	0.96	1.31	0.98	1.28	1.26	1	0.94	1	1.26	1.06	1.24	0.96	1.28	0.98	0.98	0.94	1.34	0.96	1.22	1.06	0.96	0.94	1.04	0.92	0.94	0.94	0.93	1.62	0.94	1.24	0.92	1.18	0.92
ERR206507	PRJEB2086	Imamura et al., 2016	NA	L.donovani	24203608	22450600	92.7572	16512221	68.2221	50	0.98	0.99	0.99	1.38	1.38	1	1	1.38	1	0.98	1	1	1	0.98	1.38	1	1	0.98	0.98	1	1	1	1.4	1	1	1	0.98	0.98	0.98	0.98	1.72	1.38	1.4	0.98	0.98	0.98
ERR328068	PRJEB2473	Rogers et al., 2014	Promastigote	L.infantum	20752093	17714827	85.3641	13544591	65.2686	29	1.086	0.8621	1.138	0.8621	1.155	1.138	1.259	1.207	1.241	0.8966	1	0.8966	0.8621	0.931	1.172	0.8966	0.8966	0.931	0.8966	0.8966	0.8966	0.9655	1	1.276	0.8966	1.31	0.9655	0.931	1.345	0.9655	1.69	0.931	0.931	0.9655	0.9655	1
ERR328069	PRJEB2473	Rogers et al., 2014	Promastigote	L.infantum	19932867	17581718	88.2047	13451973	67.4864	29	0.8966	0.931	0.8276	0.931	0.9655	1.207	1.086	1.034	1.103	0.931	1.069	0.9655	0.931	1.017	0.9655	0.931	0.9655	0.931	0.9655	1.034	0.931	1.069	1.207	1	1	1.207	1	0.9655	1.276	0.9655	1.862	0.9655	1	0.9655	1	1
ERR328070	PRJEB2473	Rogers et al., 2014	Promastigote	L.infantum	23396208	20284979	86.702	15215861	65.0356	33	0.9773	0.8182	0.7576	1.182	0.8485	0.8182	0.8788	1.152	1.242	0.9015	0.9394	1.273	0.8788	0.9697	1.182	0.9091	1.242	0.9394	0.9394	0.9394	0.9091	1.273	1.333	0.9091	0.8788	1.303	0.9697	0.9697	1.333	0.9697	1.697	0.9697	0.9394	0.9697	1	1
ERR328071	PRJEB2473	Rogers et al., 2014	Promastigote	L.infantum	19445045	17139318	88.1423	13216952	67.9708	29	0.8966	0.9655	0.8966	0.931	0.9655	0.931	1.138	1.069	1.034	0.9655	1.103	0.9655	0.931	1.069	0.931	0.9655	0.931	1	0.931	0.9655	0.9655	1.172	1.172	0.931	0.9655	1.069	0.9655	0.9655	1.017	0.9655	1.724	1.034	1	0.9655	0.9655	0.9655
ERR328072	PRJEB2473	Rogers et al., 2014	Promastigote	L.infantum	17971555	15564395	86.6057	12120490	67.4426	26	0.7692	0.8462	0.7692	1.192	0.8077	1.115	1.231	1.538	1.192	0.8846	0.9615	0.9038	0.9231	0.9231	0.8462	0.8846	1.231	0.9231	0.9231	0.9231	0.8846	0.9231	1.385	0.8846	0.8846	1.269	0.9615	0.9615	1	0.9231	2.038	0.9615	1.269	0.9615	0.9615	0.9712
ERR328073	PRJEB2473	Rogers et al., 2014	Promastigote	L.infantum	18292194	15618533	85.3836	12135374	66.3418	26	0.9615	0.8077	0.7692	1	1.038	1.154	1.269	1.308	1.115	0.9038	0.9615	1.154	0.8846	0.9423	1.269	0.9231	0.8846	0.9615	0.9231	0.9231	0.8846	1.154	1.269	0.9231	1.154	0.9615	0.9615	0.9615	1	0.9615	2.038	0.9615	0.9231	0.9615	0.9615	1
ERR328074	PRJEB2473	Rogers et al., 2014	Promastigote	L.infantum	19385384	16809175	86.7106	12981584	66.9658	28	0.6964	0.8214	0.9643	0.8214	1.107	1.107	1.179	0.8214	1.179	1.214	0.9286	0.8571	0.8929	1.268	1.143	0.8214	1.143	0.8929	0.8929	0.8571	1.25	0.9643	1.357	1.214	0.8571	1.25	0.9464	0.8929	0.9643	0.8929	1.929	0.9643	1.214	0.9286	0.9286	0.9286
ERR328075	PRJEB2473	Rogers et al., 2014	Promastigote	L.infantum	21284179	18184193	85.4353	13895441	65.2853	30	0.8167	0.9333	0.8333	0.8833	1.167	1.067	1.267	0.9583	0.9667	0.9667	1	1	0.9667	1.117	1	0.9333	0.9333	1	0.9333	1.083	0.9667	0.9333	1.3	0.9333	0.9	1.267	0.9667	0.9667	1.067	0.9667	1.733	0.9667	1.067	0.9667	1	0.9667
ERR328076	PRJEB2473	Rogers et al., 2014	Promastigote	L.infantum	17045997	13466996	79.0039	10743365	63.0257	23	0.6957	0.8261	0.7826	1.217	1.522	0.8043	1.261	1.217	1.261	0.913	0.9565	0.913	1.304	0.9348	0.8696	0.913	0.913	0.9565	0.913	0.913	0.913	0.913	1.391	0.913	0.913	1.348	1	0.9565	1.391	0.9565	1.739	0.9565	0.9348	1	1	1
ERR328077	PRJEB2473	Rogers et al., 2014	Promastigote	L.infantum	18528671	15962782	86.1518	12493592	67.4284	27	0.7778	0.9259	0.8519	0.9259	0.9815	0.9259	0.9815	0.963	0.963	0.963	1.037	1.037	0.963	1.056	0.9259	0.963	1.019	1.019	0.963	1	1.074	1	1.148	1	0.963	1.148	1	1	1.074	1	1.778	1	1	1	1	1
ERR328078	PRJEB2473	Rogers et al., 2014	Promastigote	L.infantum	26406617	22741746	86.1214	16660952	63.0939	37	0.7838	0.9459	0.8378	0.8919	0.9189	1.149	1.054	1.243	0.9459	0.9324	1	0.9459	0.9459	0.973	0.9459	0.9459	0.9189	0.9459	0.9054	0.9865	0.8919	1.054	1.108	0.9459	0.9189	1.297	0.973	0.9459	1.216	0.973	1.703	0.973	0.9459	0.973	0.973	0.973
SRR1254938	PRJNA210295	Zhang et al., 2014	Promastigote	L.donovani	62785661	59647869	95.0024	33615209	53.5396	108	1.051	1.088	1.088	1.046	1.065	1.037	1.037	1.037	1.083	1.065	1.074	1.056	1.278	1.009	1.028	1.056	1.028	1.046	1.009	1.269	1.037	0.9907	1.287	1.028	1	0.963	0.9259	0.9722	0.9722	0.9537	1.389	0.9444	0.9352	0.9167	0.9537	0.8796
SRR1254940	PRJNA210295	Zhang et al., 2014	Promastigote	L.donovani	101000000	94459503	93.2057	42688464	42.1218	139	1.029	1.065	1.094	1.05	1.025	1.014	1.007	1.05	1.086	1.065	1.094	1.054	1.043	1.022	1.043	1.014	1.009	1.007	0.9856	1.05	1.058	0.9712	1.147	1.065	1	0.964	0.9209	1.007	0.964	0.9658	1.324	0.9424	0.9424	0.9568	0.9496	0.9281

## Sheet: L. major
Sample	BioProject	DOI	Culture_medium	Parasite_stage	Total_read_count	Mapped_reads	Mapped_Percentage	Mapped_Percentage_MapQ30	Used_perc	Genome_Coverage_Single_Copy	LmjF.01	LmjF.03	LmjF.04	LmjF.05	LmjF.06	LmjF.07	LmjF.08	LmjF.09	LmjF.10	LmjF.11	LmjF.12	LmjF.13	LmjF.14	LmjF.15	LmjF.16	LmjF.17	LmjF.18	LmjF.19	LmjF.20	LmjF.21	LmjF.22	LmjF.23	LmjF.24	LmjF.25	LmjF.26	LmjF.27	LmjF.28	LmjF.29	LmjF.30	LmjF.31	LmjF.32	LmjF.33	LmjF.34	LmjF.35	LmjF.36
SRR1028158	PRJNA50301	Warren et al., 2021	M199	NA	10635805	10221820	96.1076	8334612	78.3637	25	1	1	0.92	0.96	1	1	1	1	1.04	1.04	1	1	1.04	1	1.04	1	1	1	1	1	1	1.04	1	1	1	1.04	1	1	1.04	2.24	1	1	1	1	1
SRR1028159	PRJNA50303	Warren et al., 2021	M199	NA	10256144	9767627	95.2368	8038121	78.3737	25	0.92	0.96	0.96	1.36	0.96	0.96	0.96	0.96	1.04	1.04	1	0.98	1.04	0.96	0.96	1.44	1	0.96	1.44	1	1	1	0.96	0.96	0.96	1	0.96	0.96	0.96	1.8	0.96	0.96	0.96	0.96	0.96
SRR1028162	PRJNA50303	Warren et al., 2021	M199	NA	8718176	8336765	95.6251	6888187	79.0095	22	1	1.045	1	1.432	1	1.045	0.9545	1.045	1	1.023	1	1	1	1	1	1.455	1.023	0.9545	1.455	1	0.9545	1	1	1	1	0.9545	0.9773	0.9545	0.9545	1.773	0.9545	0.9545	0.9091	0.9091	0.9091
SRR1028163	PRJNA157075	NA	NA	NA	9149301	8643853	94.4756	7196305	78.6542	22	1	1.045	1	1.409	1	1	1	1.023	1	1	0.9545	1	1	1	1.045	1	1	0.9545	1	1	1	1.5	1	0.9545	1	0.9545	0.9545	1	0.9545	2.182	0.9545	0.9545	0.9545	0.9545	0.9545
SRR1028164	PRJNA157075	NA	NA	NA	7316155	6993500	95.5898	5830850	79.6983	18	1.056	1.111	1.056	1.333	1.111	1.056	1.167	1.056	1.056	1.056	1.056	1.056	1.056	1.056	1.056	1.056	1.056	1	1	1.056	1.056	1.056	1.056	1.056	1.056	1	1	1	1	2.278	1	1	0.9444	0.9444	0.9444
SRR1028165	PRJNA157075	NA	NA	NA	8321589	8044954	96.6757	6683701	80.3176	20	1	1	0.95	1.45	1.05	1	1	1	1	1.5	0.95	1	1	1.35	1.35	1.05	1	1	1	1	1	1.5	1	1	1	0.95	1	1	1	2.25	0.95	1.4	0.95	0.95	0.95
SRR1028166	PRJNA157075	NA	NA	NA	9115569	8757079	96.0673	7110482	78.0037	21	0.9048	0.9524	0.9524	1.381	0.9524	0.9524	0.9524	1.429	1.429	1.429	0.9524	0.9524	1	0.9524	0.9524	0.9524	0.9524	0.9524	0.9762	1	0.9643	1.429	0.9524	0.9524	0.9524	0.9524	0.9524	0.9524	0.9524	2.905	0.9524	0.9524	0.9524	1.238	0.9524
SRR1028167	PRJNA157075	NA	NA	NA	9328087	8981776	96.2874	7452135	79.8892	22	0.9091	0.9545	0.9545	0.9545	0.9545	0.9545	0.9545	1	0.9545	1	0.9545	0.9545	1.409	1.409	1.409	0.9545	1	1.045	1.409	0.9545	0.9545	1.841	0.9545	1.364	1	0.9545	0.9545	0.9545	0.9545	2.136	0.9545	1.045	0.9545	1.045	0.9545
SRR1185716	PRJNA157075	NA	NA	NA	11229990	10834656	96.4797	8644491	76.9768	25	1.36	1	0.96	0.92	0.96	1	0.92	1	1	1	1.44	0.96	1	0.96	1	1	0.98	0.96	1.4	1	0.96	1.44	1	0.96	0.96	0.96	0.96	0.96	0.96	2.12	0.96	0.96	0.96	0.96	0.96
SRR1185717	PRJNA157075	NA	NA	NA	11824984	10948938	92.5916	8766928	74.139	25	1.04	1.04	1.02	1	1	1.04	1	1	1.04	1.03	1.04	1	1.04	1	1.04	1	1	1	1.04	1.04	1	1.44	1	1	1	1	1	1	1	2.2	0.96	0.96	1	0.96	1
SRR6369641	PRJNA422027	Bussotti et al.,2018	RPMI	Promastigotes	8826064	7914410	89.6709	6540604	74.1056	22	0.9091	0.9091	0.8636	0.9091	0.9091	0.9091	0.9091	0.9091	0.9091	0.9545	0.9545	0.9545	0.9091	0.9091	0.9091	0.9545	0.9091	0.9545	0.9091	0.9545	0.9545	0.9545	0.9545	0.9545	0.9545	1	1	1	1	1.909	1.045	1.045	1.045	1.091	1.091
SRR6369643	PRJNA422027	Bussotti et al.,2018	RPMI	Promastigotes	8010113	7669639	95.7494	6352933	79.3114	21	1	1	0.9524	0.9524	0.9524	1	0.9524	0.9524	0.9524	1	0.9524	1	1	0.9524	0.9524	1	1	0.9524	1	1	0.9524	1.048	1	1	1	1	1	1	1	1.952	1	1	1	1	1
SRR6369657	PRJNA422027	Bussotti et al.,2018	RPMI	Promastigotes	29840404	24932729	83.5536	17918645	60.0483	56	1.125	1.107	1.018	1.375	1.071	1.321	0.9464	1.036	1.054	1.107	1.348	1.018	1.286	0.9821	1.018	1.089	1.009	1.018	1.375	1	1	1.393	1	0.9643	0.9464	0.9107	0.9464	0.9643	1.071	1.982	0.9286	0.9286	0.9286	0.9107	0.9107
SRR6369658	PRJNA422027	Bussotti et al.,2018	RPMI	Promastigotes	43114069	34584157	80.2155	23056089	53.477	73	1.068	1.055	0.9863	1.308	1.041	1.26	0.9452	1	1.014	1.041	1.288	1	1.219	0.9726	1	1.082	1.007	1.007	1.329	1	1	1.322	0.9863	0.9726	0.9726	0.9178	0.9589	0.9726	1.068	1.877	0.9589	0.9452	0.9589	0.9589	0.9452
SRR6369659	PRJNA422027	Bussotti et al.,2018	RPMI	Promastigotes	37070980	31204869	84.176	21504428	58.0088	70	1.129	1.114	1.029	1.414	1.1	1.221	0.9714	1.071	1.057	1.1	1.261	1.029	1.171	0.9857	1.029	1.214	1.014	1.029	1.357	1	1	1.3	0.9714	0.9429	0.9143	0.8714	0.9143	0.9286	1.129	1.757	0.9571	0.8857	0.9	0.9	0.8857
SRR833759	PRJNA165887	NA	NA	NA	53561732	52508238	98.0331	25438705	47.4942	64	0.8594	0.8906	0.9062	1.188	0.8906	0.9453	0.9062	0.9531	1	1.031	0.9844	0.9688	1.016	0.9375	0.9531	1.281	1	0.9531	1.281	0.9688	0.9844	1.016	0.9531	0.9844	0.9688	1	1	1.016	1	1.531	1	1	1.016	1.016	1.016

## Sheet: Leptomonas
Sample	BioProject	DOI	Culture_medium	Culture_temp	Parasite_stage	Total_read_count	Mapped_reads	Mapped_Percentage	Mapped_Percentage_MapQ30	Used_perc	Genome_Coverage_Single_Copy	LpyrH10_01	LpyrH10_02	LpyrH10_03	LpyrH10_04	LpyrH10_05	LpyrH10_06	LpyrH10_07	LpyrH10_08	LpyrH10_09	LpyrH10_10	LpyrH10_11	LpyrH10_12	LpyrH10_13	LpyrH10_14	LpyrH10_15	LpyrH10_16	LpyrH10_17	LpyrH10_18	LpyrH10_19	LpyrH10_20	LpyrH10_21	LpyrH10_22	LpyrH10_23	LpyrH10_24	LpyrH10_25	LpyrH10_26	LpyrH10_27	LpyrH10_28	LpyrH10_29	LpyrH10_30	LpyrH10_31	LpyrH10_32	LpyrH10_33	LpyrH10_34	LpyrH10_35	LpyrH10_36	LpyrH10_37	LpyrH10_38
SRR2045872	PRJNA284491	Flegontov et al., 2016	Brain Heart Infusion (BHI)	23°C	NA	57873111	54551517	94.2606	26820869	46.3443	86	1.012	1.023	0.9651	1	1.012	1.023	1	0.9767	1	0.9767	1	1.477	0.9884	0.9884	0.9767	0.9535	0.9767	0.9884	0.9884	0.9651	0.9535	0.9884	0.9302	0.9535	0.9884	0.9651	0.9535	0.9767	1.459	0.9186	1	1.419	0.9535	0.9651	1.012	0.8721	0.8953	0.9535
SRR2045873	PRJNA284491	Flegontov et al., 2016	Brain Heart Infusion (BHI)	23°C	NA	9793883	9268087	94.6314	6697806	68.3876	16	1	1.062	0.9375	1	1	1.062	1	0.9375	1	0.9375	1	1.875	1	0.9375	0.9375	0.9375	0.9375	0.9375	0.9375	0.9375	0.875	0.9375	0.8125	0.875	0.9375	0.9375	0.875	0.9375	1.875	0.875	1	1.781	0.875	0.9375	1.062	0.75	0.8125	0.9375
SRR2087423	PRJNA284491	Flegontov et al., 2016	Brain Heart Infusion (BHI)	23°C	NA	7653722	7406626	96.7716	5844389	76.3601	19	0.8947	1.053	0.8947	1	1	0.9474	0.9474	1	1	0.8947	1.105	1.684	1.053	1.105	1	0.9211	0.8947	1.158	0.8421	1.053	0.9474	0.9474	1.105	0.9474	1.105	1	0.5789	1.211	1.895	1.053	1.105	1.658	1.684	0.7368	1.053	1	0.7368	1.053
SRR2087424	PRJNA284491	Flegontov et al., 2016	Brain Heart Infusion (BHI)	23°C	NA	9327223	8546642	91.6312	6460814	69.2684	22	0.8636	1.091	0.9091	1.045	1	0.9091	1	1	0.9545	0.9091	1.091	1.75	0.9091	1.136	0.9773	0.9091	0.9091	1.091	0.8182	1.045	1.091	0.9545	1.045	0.9773	1.091	0.9545	0.5909	1.227	1.773	1.045	1.068	1.591	0.9545	0.6818	1.045	1.045	0.7273	0.9091
SRR2087425	PRJNA284491	Flegontov et al., 2016	Brain Heart Infusion (BHI)	23°C	NA	8409974	8153731	96.9531	6459180	76.8038	22	0.9091	1.045	0.9545	1	1	1	1	1	1	0.9091	1.045	1.773	1	1.045	1	0.8864	0.9091	1	0.9091	1	1	0.9545	1.045	0.9091	1	0.9318	0.6818	1.091	1.864	1.045	1.045	1.682	1.091	0.7727	1.068	1	0.8182	1
SRR2087426	PRJNA284491	Flegontov et al., 2016	Brain Heart Infusion (BHI)	23°C	NA	9289997	7174064	77.2235	5577209	60.0346	16	0.75	1	1.188	0.9375	0.875	0.875	0.9375	1	0.875	0.75	1.125	2.188	1.062	1.25	1.062	1.188	0.875	1.844	0.75	1	0.9375	1.062	2.125	1.438	1.188	1.438	0.625	2.25	2.562	1.812	1.062	2.438	2.438	0.6562	1.188	1.062	0.875	1.875
SRR2087427	PRJNA284491	Flegontov et al., 2016	Brain Heart Infusion (BHI)	23°C	NA	8355754	8108032	97.0353	6178599	73.9442	20	0.9	1	1.65	0.95	1	0.95	1.05	0.95	0.95	0.9	1.05	1.75	0.95	1	0.95	0.9	0.95	1.05	0.9	1.5	0.95	0.95	1	0.95	1.025	1	1.5	1.05	1.8	1.05	1	1.7	1.45	0.8	1	0.95	1.6	0.95
SRR2087428	PRJNA284491	Flegontov et al., 2016	Brain Heart Infusion (BHI)	23°C	NA	8649678	8232372	95.1755	6568582	75.9402	22	0.8636	1	1	1	1	0.9091	1	1.045	0.9545	1	1.045	1.818	1.045	1.091	1.045	1	1	1.045	0.9545	1.091	1	1.045	1.591	1	1.068	1.045	0.8182	1.091	1.864	1.136	1	1.773	1.091	0.7727	1	1.045	0.9091	1
SRR2087429	PRJNA284491	Flegontov et al., 2016	Brain Heart Infusion (BHI)	23°C	NA	8197349	8013509	97.7573	6491812	79.194	22	0.8182	1.045	0.9318	1	1	0.8636	0.9545	1.091	0.9091	0.8636	1.091	1.727	1.045	1.136	1.091	0.9545	1	1.136	0.8182	1.091	1.045	1.091	1.227	1	1.091	1.068	0.6364	1.227	1.909	1.136	1.045	1.682	1.182	0.7727	1.091	0.9545	0.7727	1.136
SRR2087430	PRJNA284491	Flegontov et al., 2016	Brain Heart Infusion (BHI)	23°C	NA	8545824	8385535	98.1244	6559015	76.7511	22	0.9545	1.045	1	1	1	1	1.045	1	1	1	1.045	1.909	1.045	1.045	1	0.9545	1	1	0.9091	1.045	1	1	1	1	1.045	1	0.9545	1.045	1.955	1.023	1.045	1.864	1	0.9545	1.045	1.091	0.9432	1
SRR2087431	PRJNA284491	Flegontov et al., 2016	Brain Heart Infusion (BHI)	23°C	NA	10438223	10147288	97.2128	7870239	75.3983	26	0.8846	1.038	0.9615	1	1.038	0.9231	1.038	1	0.9615	1	1.077	1.923	1.077	1.115	1	0.9615	1	1.077	0.8846	1.077	1	1.038	1.038	1	1.115	1.038	0.7308	1.154	1.981	1.077	1.038	1.808	0.9615	1.154	1.038	0.9615	0.8462	1
SRR2087432	PRJNA284491	Flegontov et al., 2016	Brain Heart Infusion (BHI)	23°C	NA	9351243	8985818	96.0922	6971978	74.5567	23	0.8696	1.087	0.9565	1	1	0.9565	1	1	0.9565	0.8696	1.065	1.652	0.9565	1.087	0.9565	0.8696	0.8261	1.087	0.7826	0.9565	0.9565	1.087	1.13	0.8261	1.043	0.913	0.6087	1.217	1.913	1	0.9565	1.696	1.13	0.7826	1.152	1	0.7391	1.217
SRR2087433	PRJNA284491	Flegontov et al., 2016	Brain Heart Infusion (BHI)	23°C	NA	10241657	9320455	91.0053	7306579	71.3418	20	0.85	1.05	0.95	1	0.95	0.9	0.95	1	0.95	0.95	1	1.85	1.125	1.15	1.1	0.95	0.95	1.15	0.85	1.1	1	1.1	1.2	0.95	1.25	1	0.7	1.5	1.95	1.15	1.1	1.925	1.2	0.95	1.25	1.15	0.675	1.3
SRR2087434	PRJNA284491	Flegontov et al., 2016	Brain Heart Infusion (BHI)	23°C	NA	7929864	7658138	96.5734	5843119	73.685	18	1	1	1.333	1	1.056	1	1.111	1	1	1	1	2.333	1	1	1	0.9444	1	1	0.9444	1	1	1	1	0.9444	1	1	1.333	1.056	2.389	1	1.056	2.278	1	0.9167	1.056	0.9444	1.389	1
SRR2087435	PRJNA284491	Flegontov et al., 2016	Brain Heart Infusion (BHI)	23°C	NA	8203658	7844266	95.6191	6130756	74.732	21	0.8571	1	0.9524	1	1	0.9524	0.9524	1	0.9524	0.9048	1.048	1.714	1	1.095	1.048	0.9048	0.9524	1.095	0.8571	1.048	1	0.9524	1.048	0.9048	1.071	1.048	0.6667	1.095	1.81	1.048	1.048	1.667	1.095	0.7619	1	1	0.8095	0.9524
SRR2048658	PRJNA285179	Kraeva et al., 2015	Schneider's Drosophila medium (SDM)	23°C	NA	55195342	10659973	19.3132	2824193	5.11672	16	0.9375	0.9375	0.7812	1.188	0.8125	1.078	0.9688	0.8438	1.031	1	0.875	1.75	1.312	0.7812	0.75	0.5625	1.188	0.75	0.5625	0.8125	1	1.031	1.281	1.031	1	1.062	1.312	0.7812	1.125	1.125	0.9375	1.938	0.875	0.9688	1.312	0.3125	1.656	1.312
[truncated: 1 more columns]

## Sheet: P.confusum
Sample	BioProject	DOI	Culture_medium	Culture_temp	Parasite_stage	Total_read_count	Mapped_reads	Mapped_Percentage	Mapped_Percentage_MapQ30	Used_perc	Genome_Coverage_Single_Copy	Pcon_scaffold00001_1	Pcon_scaffold00001_2	Pcon_scaffold00001_3	Pcon_scaffold00001_4	Pcon_scaffold00001_5	Pcon_scaffold00002_1	Pcon_scaffold00002_2	Pcon_scaffold00002_3	Pcon_scaffold00002_4	Pcon_scaffold00003_1	Pcon_scaffold00003_2	Pcon_scaffold00003_3	Pcon_scaffold00004_1	Pcon_scaffold00004_2	Pcon_scaffold00005_2	Pcon_scaffold00005_3	Pcon_scaffold00005_4	Pcon_scaffold00006_3	Pcon_scaffold00006_4	Pcon_scaffold00006_5	Pcon_scaffold00007_2	Pcon_scaffold00007_3	Pcon_scaffold00008_1	Pcon_scaffold00008_4	Pcon_scaffold00009_1	Pcon_scaffold00009_2	Pcon_scaffold00010_1	Pcon_scaffold00010_2	Pcon_scaffold00010_4	Pcon_scaffold00011_1	Pcon_scaffold00011_2	Pcon_scaffold00011_3	Pcon_scaffold00012_1	Pcon_scaffold00012_3	Pcon_scaffold00012_4	Pcon_scaffold00013_2	Pcon_scaffold00014_2	Pcon_scaffold00014_3
SRR6231229	PRJNA414522	Skalický et al., 2017	RPMI 1640 + M199 (1:1)	27°C	Promastigote	2626087	2495507	95.0276	2217925	84.4574	11	1	1	1	1	1.136	1	1	0.9545	1	1	0.9545	1	1	1	1	1	1	0.9091	1	0.9091	1	1.091	1.091	1	0.9091	1	0.9091	1	1	1	1	1	1	1	0.9091	1	1	1
SRR6231230	PRJNA414522	Skalický et al., 2017	RPMI 1640 + M199 (1:1)	27°C	Promastigote	6861747	6360592	92.6964	4214530	61.4207	35	1.029	1.057	1.029	1.029	1.157	1.043	1.029	1	1.043	1.029	1.029	1.029	1.057	1.086	1.057	1.057	1.057	1.029	1.029	1	1.014	1.057	1.057	1.057	1.029	1.057	0.9286	1	0.9714	1.057	1.029	1.029	1.043	1.057	0.9714	1.057	1	1.057
[truncated: 60 more columns]

## Sheet: Porcisia
Sample	BioProject	DOI	Culture_medium	Parasite_stage	Total_read_count	Mapped_reads	Mapped_Percentage	Mapped_Percentage_MapQ30	Used_perc	Genome_Coverage_Single_Copy	CM030504	CM030505	CM030506	CM030507	CM030508	CM030509	CM030510	CM030511	CM030512	CM030513	CM030514	CM030515	CM030516	CM030517	CM030518	CM030519	CM030520	CM030521	CM030522	CM030523	CM030524	CM030525	CM030526	CM030527	CM030528	CM030529	CM030530	CM030531	CM030532	CM030533	CM030534	CM030535	CM030536	CM030537	CM030538	CM030539
SRR13125063	PRJNA680237	Albanaz et al., 2021	M199	Promastigote	35428408	29782875	84.0649	19143371	54.034	73	0.9041	0.9041	0.9726	0.9726	0.9726	0.9315	0.9863	0.9589	0.9795	0.9726	1.014	0.9726	1	0.9589	1	0.9863	1	0.9863	1	1	0.9863	0.9452	0.9795	1	0.9726	0.9863	1.027	1	1.041	1	1.521	1.014	1.034	1	1.014	1.014
SRR13125479	PRJNA680239	Albanaz et al., 2021	M199	Promastigote	28359383	27665822	97.5544	19000199	66.9979	69	0.913	0.8986	0.9855	0.9565	0.942	1.261	0.9855	0.9565	0.971	1.297	0.9855	1.014	1.449	0.971	1	0.9855	1	0.9855	1.304	1.014	0.9855	0.971	1.333	1	0.971	1	1.043	0.9855	1.022	0.9964	1.29	1	1.011	0.971	0.9855	0.9855
SRR13558754	PRJNA691541	Almutairi et al., 2021	NA	NA	7014664	6804397	97.0025	5050405	71.9978	27	1	0.9074	1.074	1	1.481	1	1.019	1.019	1	0.963	1	1.037	1	0.963	0.963	1	1	1	0.963	1	1	0.963	1.926	1	1	1.037	1	0.963	1.056	0.963	1.778	0.963	1	0.963	0.963	0.963
SRR13558755	PRJNA691541	Almutairi et al., 2021	NA	NA	13450466	13034284	96.9058	7980990	59.3362	39	1	0.9231	1.026	1	1.359	1.026	1	0.9744	0.9744	1	1	1.026	1	0.9744	1	1	1	0.9744	0.9744	1	1	0.9744	1.897	1	1	1.026	1	1	1.077	1	1.718	1	1	0.9744	0.9744	0.9744
SRR13558756	PRJNA691541	Almutairi et al., 2021	NA	NA	3520123	3456241	98.1852	2944909	83.6593	24	0.9583	0.875	1.042	1	1.458	0.9583	0.9583	1	0.9583	0.9583	1	1	1	0.9583	0.9583	0.9583	1.042	1	0.9583	1.042	0.9792	0.9167	2.083	0.9583	1	1.042	1	1	1.125	1	1.875	1	1	1	1	1

## Sheet: T.brucei
Sample	BioProject	DOI	Culture_medium	Culture_temp	Parasite_stage	Species	Total_read_count	Mapped_reads	Mapped_Percentage	Mapped_Percentage_MapQ30	Used_perc	Genome_Coverage_Single_Copy	Tb927_01_v5.1	Tb927_02_v5.1	Tb927_03_v5.1	Tb927_04_v5.1	Tb927_05_v5.1	Tb927_06_v5.1	Tb927_07_v5.1	Tb927_08_v5.1	Tb927_09_v5.1	Tb927_10_v5.1	Tb927_11_v5.1
ERR005857	PRJEB2010	NA	NA	NA	NA	T. brucei	13018528	10383543	79.7597	6383361	49.0329	17	1	1	1.059	1	0.9412	1.412	1	0.9412	1	1	1
ERR005858	PRJEB2010	NA	NA	NA	NA	T. brucei	12695044	10393209	81.8682	6483043	51.0675	18	1	0.9474	1	1	0.9474	1.053	0.9474	0.9474	1	0.9474	0.9474
ERR005859	PRJEB2011	NA	NA	NA	NA	T. brucei	12004643	9759803	81.3002	6454288	53.7649	16	1	0.9412	1	0.9412	0.9412	1.118	0.9412	0.9412	1	1	1
ERR005860	PRJEB2011	NA	NA	NA	NA	T. brucei	14478077	12276858	84.7962	8044754	55.5651	22	1	0.9565	1	0.9565	1.043	1.087	0.9565	0.913	1.043	0.9565	0.9565
ERR005861	PRJEB2012	NA	NA	NA	NA	T. brucei	11421001	9077025	79.4766	5741489	50.2713	16	1.062	1.062	1.062	1	1	1.125	1	1	1	1	1
ERR022566	PRJEB2205	Wyllie et al., 2016	HMI-9T	37°C	Bloodstream	T. brucei	56652511	41709589	73.6235	19241811	33.9646	58	1.017	1	1	1	0.9831	1.034	0.9831	0.9661	1	0.9873	0.9831
ERR1517160	PRJEB11437	Devlin, Marques et al., 2016	HMI-9	37°C	Bloodstream	T. brucei	35706568	29564437	82.7983	15805830	44.2659	72	1.014	1	0.9863	1.055	0.9863	0.9589	0.9863	1.027	1	1.014	1.014
ERR1517161	PRJEB11437	Devlin, Marques et al., 2016	HMI-9	37°C	Bloodstream	T. brucei	33522851	28614831	85.3592	15825057	47.2068	75	0.9868	0.9868	1	1	0.9868	0.9868	1	1.013	1.01	1	1.013
ERR1517162	PRJEB11437	Devlin, Marques et al., 2016	HMI-9	37°C	Bloodstream	T. brucei	38804309	32951886	84.9181	17480455	45.0477	83	1.012	0.994	0.988	1.024	0.988	0.9759	1	1.024	1	1	1.012
ERR1517163	PRJEB11437	Devlin, Marques et al., 2016	HMI-9	37°C	Bloodstream	T. brucei	34203387	29257253	85.5391	15801233	46.1979	73	1.068	1.027	0.9324	1.108	0.9189	0.9054	0.9865	1.068	0.973	0.9865	1.014
ERR1517164	PRJEB11437	Devlin, Marques et al., 2016	HMI-9	37°C	Bloodstream	T. brucei	36527913	30241247	82.7894	15585569	42.6676	67	1.088	1.037	1	1.103	0.9853	0.9559	0.9853	1.044	0.9853	1	1.015
ERR1517165	PRJEB11437	Devlin, Marques et al., 2016	HMI-9	37°C	Bloodstream	T. brucei	32063578	25838937	80.5866	13719346	42.7879	59	1	1	1	1	1	1.017	1	0.9831	1	1	1
ERR1517166	PRJEB11437	Devlin, Marques et al., 2016	HMI-9	37°C	Bloodstream	T. brucei	33450203	27464827	82.1066	14569246	43.555	65	1.015	1.015	1	1.015	1	1	1	1.015	1	1	1.015
ERR1517167	PRJEB11437	Devlin, Marques et al., 2016	HMI-9	37°C	Bloodstream	T. brucei	33544124	28207582	84.091	14829081	44.2077	65	1.106	1.106	1.008	1.136	0.9394	0.9091	0.9848	1.091	0.9545	0.9848	1.03
ERR2026043	PRJEB21645	Vasquez et al., 2018	SDM79	NA	Procyclic	T. brucei	8719783	7103481	81.464	4685136	53.73	17	1	1.412	0.9412	1.029	1	1.294	1	1.059	0.9412	1	1
ERR2026044	PRJEB21645	Vasquez et al., 2018	SDM79	NA	Procyclic	T. brucei	10076633	7269602	72.1432	4579803	45.4497	16	1.062	1.5	1	1.062	1	0.9375	1	1.062	1	1	1
ERR2026045	PRJEB21645	Vasquez et al., 2018	SDM79	NA	Procyclic	T. brucei	11513350	9604082	83.4169	5973207	51.8807	22	1.045	1	1	1.045	1	1.364	1	1.045	1	1	1
ERR2220927	PRJEB23951	Begolo et al., 2018	HMI-9	37°C	Bloodstream	T. brucei brucei	26255641	23106033	88.0041	13085486	49.8388	136	0.9928	0.9856	0.9712	1.029	1.345	0.9137	0.9928	1.043	0.9712	0.9784	1.007
ERR2220928	PRJEB23951	Begolo et al., 2018	HMI-9	37°C	Bloodstream	T. brucei brucei	25700333	22784520	88.6546	12941627	50.3559	139	1.014	1.003	0.993	1.035	0.9755	0.9161	0.993	1.063	0.979	0.986	1.014
ERR2220929	PRJEB23951	Begolo et al., 2018	HMI-9	37°C	Bloodstream	T. brucei brucei	27422814	24538133	89.4807	14084512	51.3606	152	1.019	0.9935	1	1.019	1.271	0.9355	0.9935	1.045	0.9871	0.9871	1.005
ERR2220930	PRJEB23951	Begolo et al., 2018	HMI-9	37°C	Bloodstream	T. brucei brucei	17402696	15872928	91.2096	7868196	45.2125	39	1.025	1.025	1	1.025	1.275	0.875	1	1.075	0.95	0.975	0.975
ERR2220932	PRJEB23951	Begolo et al., 2018	HMI-9	37°C	Bloodstream	T. brucei brucei	19578519	17175126	87.7243	9182496	46.9009	91	1	1	1.011	1.043	0.9891	0.9565	0.9891	1.033	0.9891	1	1.011
ERR2220933	PRJEB23951	Begolo et al., 2018	HMI-9	37°C	Bloodstream	T. brucei brucei	20354406	18539478	91.0834	9437381	46.3653	59	1.033	1	0.9836	1.049	0.9836	0.8689	0.9836	1.082	0.9672	1	1
ERR270813	PRJEB2486	NA	NA	NA	NA	T. brucei gambiense	22523737	17357323	77.0624	10271823	45.6044	31	1	1	1	1	0.9688	1.031	1	0.9688	1	1	0.9688
ERR270814	PRJEB2486	NA	NA	NA	NA	T. brucei gambiense	16170080	14347956	88.7315	9006128	55.6962	28	1.036	1.036	1.036	1.036	1	1.036	1	1	1	1	1
ERR270815	PRJEB2486	NA	NA	NA	NA	T. brucei gambiense	16806586	14780475	87.9445	8868532	52.7682	27	1.037	1.074	1.037	1	1	1.037	0.9815	1	1	1	1
ERR270816	PRJEB2486	NA	NA	NA	NA	T. brucei gambiense	30046929	26572817	88.4377	14856693	49.445	47	0.9792	0.9792	1.021	1	0.9792	1.042	0.9792	0.9792	1	1	0.9792
ERR270817	PRJEB2486	NA	NA	NA	NA	T. brucei rhodesiense	18602651	14547508	78.2013	8644265	46.4679	26	1	1	1	1	1	1	0.9615	1	1	1	1
ERR270818	PRJEB2486	NA	NA	NA	NA	T. brucei gambiense	27175519	23303267	85.751	13451397	49.4982	43	0.9773	0.9773	1	1	1	1.023	1	0.9773	1	1	1
ERR270819	PRJEB2486	NA	NA	NA	NA	T. brucei gambiense	23981282	20412158	85.117	12332462	51.4254	39	0.9744	0.9744	1.026	1.051	1	1.026	0.9744	1	1.026	1.026	1
ERR270820	PRJEB2486	NA	NA	NA	NA	T. brucei	19811760	15142781	76.4333	8653149	43.6768	25	1	0.96	1	1	0.96	1	0.96	1	1	1	1
ERR270821	PRJEB2486	NA	NA	NA	NA	T. brucei rhodesiense	25602311	19567547	76.4288	10799268	42.1808	31	0.9688	1	1	0.9688	0.9688	1	0.9688	0.9688	1.219	0.9688	0.9688
ERR270822	PRJEB2486	NA	NA	NA	NA	T. brucei gambiense	17374141	13116862	75.4965	7538317	43.3881	22	1	1	1	1	1	1	0.9545	1	1	1	1
ERR270824	PRJEB2486	NA	NA	NA	NA	T. brucei gambiense	27337232	20572734	75.2554	11265988	41.2112	34	1.043	1.029	1.029	1.029	1	1	0.9714	1	1	1	1
ERR270825	PRJEB2486	NA	NA	NA	NA	T. brucei	41886125	32594293	77.8164	16450153	39.2735	50	1.04	1.02	1.02	1.02	1.36	1	1	1.02	1	1	1
ERR270826	PRJEB2486	NA	NA	NA	NA	T. brucei gambiense	42786749	37999872	88.8122	19258665	45.0108	65	1.015	1	1.015	1.015	1	1	1	1.015	1	1	1
ERR270828	PRJEB2486	NA	NA	NA	NA	T. brucei gambiense	49878935	36241143	72.6582	18989790	38.0718	64	1	0.9844	1.004	1.031	1	0.9844	1	1.016	1	1.016	1.016
ERR270829	PRJEB2486	NA	NA	NA	NA	T. brucei gambiense	45283476	19472926	43.0023	11680327	25.7938	38	1	1	1	1.026	0.9744	0.9744	0.9744	1.026	0.9744	1	1
ERR270830	PRJEB2486	NA	NA	NA	NA	T. brucei gambiense	47168343	25750052	54.5918	14505999	30.7537	47	1.021	0.9792	1.01	1.021	0.9792	0.9792	0.9844	1	1	0.9792	1
ERR270831	PRJEB2486	NA	NA	NA	NA	T. brucei gambiense	29407689	26338615	89.5637	15119994	51.4151	66	1	1	1.015	1.008	1.015	1.03	1	1	1	1	1
ERR270832	PRJEB2486	NA	NA	NA	NA	T. brucei gambiense	28399796	25479082	89.7157	14684129	51.705	64	1.031	1.016	1.031	1.031	1.016	1	1	1.016	1	1	1
ERR270833	PRJEB2486	NA	NA	NA	NA	T. brucei gambiense	29886532	26826487	89.7611	15393427	51.5062	67	1	1	1.015	1.03	1	1.015	1	1.007	1	1	1
ERR270834	PRJEB2486	NA	NA	NA	NA	T. brucei gambiense	32520230	28769017	88.465	16010983	49.2339	71	1.028	1.014	1.028	1.028	1	0.9859	1	1.028	1	1	1
ERR270835	PRJEB2486	NA	NA	NA	NA	T. brucei gambiense	28929724	25791764	89.1532	14808896	51.1892	64	1	1	1.015	1	0.9846	1	0.9846	1	1	1	1
ERR270836	PRJEB2486	NA	NA	NA	NA	T. brucei gambiense	29549355	26372565	89.2492	14918640	50.4872	65	1.046	1.031	1.031	1.015	1.015	1.015	1	1.015	1	1	1
ERR270837	PRJEB2486	NA	NA	NA	NA	T. brucei gambiense	28596659	24641750	86.17	14091155	49.2755	61	1.049	1.016	1.033	1.033	1.016	1	1	1.016	1	1	1
ERR270838	PRJEB2486	NA	NA	NA	NA	T. brucei gambiense	28745932	26067509	90.6824	14268885	49.6379	62	1.016	1.016	1.016	1.032	1	1	1	1.016	1	1	1
ERR270839	PRJEB2486	NA	NA	NA	NA	T. brucei gambiense	28020816	20791392	74.1998	12335462	44.0225	53	0.9815	1	1	1.019	0.9815	1	0.9815	1	1	0.9815	1
ERR270840	PRJEB2486	NA	NA	NA	NA	T. brucei	25227177	19486915	77.2457	11459387	45.4248	48	1.042	1.042	1.042	1.042	1.021	1.021	1	1.021	1	1	1
ERR270841	PRJEB2486	NA	NA	NA	NA	T. brucei	33854073	30509532	90.1207	16805908	49.6422	73	1	1.007	1.014	1.014	1	1	0.9865	1	1	1	1
ERR270842	PRJEB2486	NA	NA	NA	NA	T. brucei	28069792	25209380	89.8096	14188576	50.5475	60	1.016	1.016	1.016	1.016	1	1	0.9836	1	0.9918	0.9836	0.9836
ERR270843	PRJEB2486	NA	NA	NA	NA	T. brucei	49896960	43085423	86.3488	21142865	42.373	94	1	1	1	1	1	1	0.9895	1	1	1	1
ERR270845	PRJEB2486	NA	NA	NA	NA	T. brucei	33058674	6294782	19.0412	3920298	11.8586	16	1	1.062	1	1	1	1	1	1	1	1	1
ERR270847	PRJEB2486	NA	NA	NA	NA	T. brucei	44586543	8330531	18.684	5082920	11.4001	21	1	1.048	1	1	1	1	1	1	1	1	1
ERR270848	PRJEB2486	NA	NA	NA	NA	T. brucei	19713979	16723095	84.8286	8934423	45.3202	37	1.054	1.081	1.027	1.027	1.027	1.027	1	1	1	1	1
ERR270849	PRJEB2486	NA	NA	NA	NA	T. brucei	22666671	19147564	84.4745	10364566	45.726	44	1.022	1.022	1	1.022	1	1	0.9778	1	1	0.9778	1
ERR270850	PRJEB2486	NA	NA	NA	NA	T. brucei	28703575	24411360	85.0464	12924449	45.0273	56	1.018	1.036	1.018	1.018	1	1.018	1	1	1	1	1
ERR270851	PRJEB2486	NA	NA	NA	NA	T. brucei	36899271	31538646	85.4723	16334117	44.2668	71	1.028	1.042	1.028	1.014	1	1	1	1	0.9861	0.9861	1
ERR270852	PRJEB2486	NA	NA	NA	NA	T. brucei	26759365	23440813	87.5985	12974186	48.4847	56	1.054	1.071	1.054	1.036	1.018	1.036	1	1.018	0.9821	1	0.9911
ERR270853	PRJEB2486	NA	NA	NA	NA	T. brucei	20429134	18013165	88.1739	10306473	50.4499	44	1	1.068	1.023	1.023	1	1.023	1	1	1	1	1
ERR270854	PRJEB2486	NA	NA	NA	NA	T. brucei	36028142	30596769	84.9246	15164061	42.0895	61	1.049	1.049	1.033	1.033	1.016	1.033	0.9836	1	0.9836	1	0.9836
ERR270855	PRJEB2486	NA	NA	NA	NA	T. brucei	47744136	39796026	83.3527	17780767	37.2418	78	1.026	1.026	1.026	1.026	1.013	1	0.9872	1	0.9872	0.9936	0.9872
ERR270857	PRJEB2486	NA	NA	NA	NA	T. brucei	32357204	28594278	88.3707	16162826	49.9512	72	1.014	1.028	1.028	1.014	1.014	1.014	1	1	1	0.9861	1
ERR270858	PRJEB2486	NA	NA	NA	NA	T. brucei	35798598	31395705	87.7009	17299200	48.3237	76	1.039	1.039	1.039	1.039	1.013	1	0.987	1.013	0.974	0.987	0.987
ERR270859	PRJEB2486	NA	NA	NA	NA	T. brucei	29379227	24577183	83.655	14273286	48.5829	63	1	1.016	1.016	1.016	1	1	0.9844	1	0.9844	0.9844	1
ERR270860	PRJEB2486	NA	NA	NA	NA	T. brucei	28327228	24760536	87.409	14420659	50.9074	64	1.016	1.016	1.016	1.016	1	1.016	1	1	1	1	1
ERR270861	PRJEB2486	NA	NA	NA	NA	T. brucei	34219206	28064982	82.0153	15522580	45.3622	68	1.029	1.059	1.015	1.015	1.015	1.015	1	1	1	1	1
ERR270862	PRJEB2486	NA	NA	NA	NA	T. brucei	28980292	25137677	86.7406	14323578	49.4252	62	1.063	1.048	1.063	1.048	1.032	1.016	1	1.016	0.9683	0.9841	0.9841
ERR270863	PRJEB2486	NA	NA	NA	NA	T. brucei	23874071	19498585	81.6726	11887279	49.7916	53	1.038	1.019	1.038	1.019	1	1.019	1	1	1	0.9811	1
ERR270864	PRJEB2486	NA	NA	NA	NA	T. brucei	28424989	25256570	88.8534	14647291	51.5296	64	1.016	1.031	1.031	1.016	1.016	1.016	1	1	1	0.9844	1
ERR270865	PRJEB2486	NA	NA	NA	NA	T. brucei	27682640	23972326	86.597	13758319	49.7002	59	1.067	1.067	1.067	1.05	1.033	1.017	0.9833	1.017	0.95	0.9667	0.9667
ERR270866	PRJEB2486	NA	NA	NA	NA	T. brucei	30826779	26009591	84.3734	14329419	46.4837	60	1.016	1.049	1.016	1	1	1.033	1	0.9836	1	0.9836	0.9836
ERR270867	PRJEB2486	NA	NA	NA	NA	T. brucei	25045328	21324792	85.1448	12598217	50.3017	54	1.083	1.037	1.019	1.019	1	1.019	1	1	1	1	1
ERR270868	PRJEB2486	NA	NA	NA	NA	T. brucei	26488583	23186793	87.535	13838722	52.2441	60	1.033	1.033	1.033	1.017	1.017	1.033	1	1.017	1	1	1
ERR270869	PRJEB2486	NA	NA	NA	NA	T. brucei	24506360	21321852	87.0054	12711226	51.8691	54	1.037	1.056	1.037	1.019	1.019	1.019	1	1	1	1	1
ERR270870	PRJEB2486	NA	NA	NA	NA	T. brucei	27094440	24335456	89.8172	14162470	52.2708	62	0.9841	0.9881	1	1.016	0.9841	0.9841	0.9841	1	1	0.9841	1
ERR270871	PRJEB2486	NA	NA	NA	NA	T. brucei	33199146	28399126	85.5417	16019165	48.2517	68	1.014	1.029	1.014	1	1	1.014	0.9855	1	0.9855	0.9855	0.9855
ERR270872	PRJEB2486	NA	NA	NA	NA	T. brucei	22666632	19809202	87.3937	11804197	52.0774	50	1.039	1.039	1.039	1.02	1	1	1	1	0.9804	0.9804	0.9804
ERR270873	PRJEB2486	NA	NA	NA	NA	T. brucei	20175655	17391249	86.1992	10732135	53.1935	46	1.022	1.043	1.043	1.022	1.022	1.022	1	1	1	1	1
ERR270874	PRJEB2486	NA	NA	NA	NA	T. brucei	23783780	21160788	88.9715	12790509	53.7783	55	1.018	1.036	1.036	1.018	1.054	1	0.9821	1	0.9821	0.9821	0.9821
ERR270875	PRJEB2486	NA	NA	NA	NA	T. brucei	22587919	19324164	85.5509	11588286	51.303	50	1.02	1.04	1.035	1.02	1	1.02	1	1	1	1	0.98
ERR270876	PRJEB2486	NA	NA	NA	NA	T. brucei	23106215	20097374	86.9782	12188621	52.7504	53	1	1.019	1.019	1	1	1.019	0.9811	1	1	1	1
ERR270877	PRJEB2486	NA	NA	NA	NA	T. brucei	21763982	19182282	88.1377	11607497	53.3335	50	1	1.02	1.02	1.02	1	1.02	1	1	1	1	1
ERR270878	PRJEB2486	NA	NA	NA	NA	T. brucei	22944858	20388263	88.8577	12067841	52.595	52	1.019	1.019	1.019	1.019	1	1	1	1.019	1	1	1
ERR270879	PRJEB2486	NA	NA	NA	NA	T. brucei	21846376	18855630	86.3101	11283241	51.6481	48	1	1.041	1.02	1.02	1	1.02	1	0.9796	0.9796	0.9796	0.9796
ERR270880	PRJEB2486	NA	NA	NA	NA	T. brucei	25859963	8207753	31.7392	5514526	21.3246	24	1.042	1	1.042	1	1	1	0.9583	1	0.9583	0.9583	1
ERR270881	PRJEB2486	NA	NA	NA	NA	T. brucei	30125089	25776467	85.5648	14749921	48.9622	64	1	1.031	1.015	1.015	1	1	1	1	1	0.9962	1
ERR270882	PRJEB2486	NA	NA	NA	NA	T. brucei	29158614	24662104	84.5791	14061172	48.2231	62	1.016	1.032	1.016	1.016	1	1.016	1	1	1	1	1
ERR270883	PRJEB2486	NA	NA	NA	NA	T. brucei	38764023	33254042	85.7858	17630482	45.4816	78	1.013	1.025	1.013	1	1	1	0.9873	1	1	0.9937	1
ERR270884	PRJEB2486	NA	NA	NA	NA	T. brucei	26021133	22153566	85.1368	13032082	50.0827	57	1.017	1.017	1.017	1.017	1	1	1	1	0.9828	0.9828	0.9828
ERR270885	PRJEB2486	NA	NA	NA	NA	T. brucei	23872145	19503710	81.7007	11450997	47.968	50	1.02	1.02	1.02	1.02	1	1.02	1	1	0.98	0.98	1
ERR270886	PRJEB2486	NA	NA	NA	NA	T. brucei	30732557	26314830	85.6252	14955201	48.6624	65	1.03	1.061	1.015	1.015	1	1.015	1	1	1	0.9848	0.9848
ERR270887	PRJEB2486	NA	NA	NA	NA	T. brucei	30145612	26323586	87.3214	14645344	48.582	64	1.016	1.031	1.016	1.016	1.359	1	1	1	1	0.9844	1
ERR270888	PRJEB2486	NA	NA	NA	NA	T. brucei	22791440	19862998	87.1511	12062966	52.9276	53	1.019	1.037	1	1	1	1	0.9815	1	1	0.9954	1
ERR270889	PRJEB2486	NA	NA	NA	NA	T. brucei	23584506	20338187	86.2354	11685031	49.5454	50	1.059	1.078	1.039	1.02	1	1.02	1	1	0.9804	0.9804	0.9804
ERR270890	PRJEB2486	NA	NA	NA	NA	T. brucei	27193777	24226475	89.0883	14293510	52.5617	63	1.016	1.032	1.032	1.032	1	1.016	1	1	1	1	1
ERR270891	PRJEB2486	NA	NA	NA	NA	T. brucei	29221662	24091755	82.4449	13987893	47.8682	62	1.032	1.016	1.016	1.016	1.016	1.016	1	1.016	1	1	1
ERR270892	PRJEB2486	NA	NA	NA	NA	T. brucei	28028863	24578165	87.6888	14492837	51.7068	64	1.016	1.047	1.016	1.016	1.016	1	1	1.016	1	1	1
ERR270893	PRJEB2486	NA	NA	NA	NA	T. brucei	24612683	21663999	88.0197	12970195	52.6972	56	1.018	1.036	1.036	1.036	1.018	1.018	1	1.018	1	1	1
ERR270894	PRJEB2486	NA	NA	NA	NA	T. brucei	23384449	20940094	89.5471	12535712	53.607	55	1.018	1.036	1.036	1.036	1	1	1	1.018	1	1	1
ERR270895	PRJEB2486	NA	NA	NA	NA	T. brucei	22285155	18747712	84.1265	11250669	50.485	49	1.041	1.041	1.041	1.041	1.02	1	1	1	0.9796	0.9796	0.9796
ERR270896	PRJEB2486	NA	NA	NA	NA	T. brucei	32706673	7973379	24.3785	5099511	15.5916	22	1	1	1	1	1	1	1	1	1	1	1
ERR270897	PRJEB2486	NA	NA	NA	NA	T. brucei	21258177	18630681	87.6401	11445008	53.8381	50	1.02	1.059	1.02	1.02	0.9804	1	1	1	0.9804	0.9804	0.9804
ERR270898	PRJEB2486	NA	NA	NA	NA	T. brucei	20706297	18492604	89.3091	11129029	53.7471	48	1.02	1.02	1	1	1.367	0.9796	0.9796	1	0.9796	0.9796	0.9796
ERR270899	PRJEB2486	NA	NA	NA	NA	T. brucei	20932185	18102096	86.4797	10515462	50.2358	46	1.043	1.043	1.022	1.022	1.022	1	1	1.022	1	1	1
ERR270900	PRJEB2486	NA	NA	NA	NA	T. brucei	28065322	24739981	88.1514	14287439	50.9078	63	1.031	1.047	1.016	1.016	1	1	1	1	0.9844	0.9844	1
ERR270901	PRJEB2486	NA	NA	NA	NA	T. brucei	16018638	14090262	87.9617	9123836	56.9576	40	1.038	1.1	1.025	1.025	1	1	1	1	1	1	1
ERR270902	PRJEB2486	NA	NA	NA	NA	T. brucei	22522394	19677554	87.3688	11911462	52.8872	51	1.077	1.106	1.038	1.019	1	1	1	1	0.9808	0.9808	0.9808
ERR270903	PRJEB2486	NA	NA	NA	NA	T. brucei	18957999	16836192	88.8079	10299185	54.3263	45	1.044	1.067	1.044	1.033	1.022	1.022	1	1	1	1	1
ERR273552	PRJEB2486	NA	NA	NA	NA	T. brucei	20831902	18396624	88.3099	11246379	53.9863	48	1.062	1.062	1.083	1.042	1.042	1.042	1	1.021	0.9792	1	0.9792
ERR273553	PRJEB2486	NA	NA	NA	NA	T. brucei	18332967	15911325	86.7908	9931852	54.1748	42	1	1.047	1.023	1.023	1.023	1	1	1	0.9767	0.9767	0.9767
ERR273554	PRJEB2486	NA	NA	NA	NA	T. brucei	14016723	12200493	87.0424	7810238	55.7209	33	1.03	1.061	1.03	1.03	1.03	1.03	1.03	1	1	1	1
ERR273555	PRJEB2486	NA	NA	NA	NA	T. brucei	18903077	16891716	89.3596	10501798	55.556	45	1.044	1.044	1.067	1.044	1.022	1	1	1	0.9778	0.9778	0.9778
ERR273556	PRJEB2486	NA	NA	NA	NA	T. brucei	17042478	15130904	88.7835	9596230	56.3077	41	1.049	1.049	1.073	1.049	1.024	1.024	1	1.024	0.9756	1	1
ERR273557	PRJEB2486	NA	NA	NA	NA	T. brucei	23659874	20922326	88.4296	12243965	51.7499	52	1.019	1.019	1	1.019	0.9811	1	1.094	0.9811	0.9811	0.9811	0.9811
ERR273558	PRJEB2486	NA	NA	NA	NA	T. brucei gambiense	11668253	9172202	78.6082	5633927	48.2842	22	1.045	1	1	1.045	1	0.9545	0.9545	1	1	1	1
ERR273559	PRJEB2486	NA	NA	NA	NA	T. brucei	14381857	11310321	78.643	6770805	47.0788	27	1	1	1.019	1.037	1	1	1	1.037	1.009	1	1
ERR3562602	PRJEB34627	Giordani et al., 2020	HMI-11	37°C	Bloodstream	T. brucei brucei	50085342	37157141	74.1877	17150936	34.2434	54	1.028	1.019	1	1.037	1	0.9815	1	1.037	1	1	1.019
ERR3562603	PRJEB34627	Giordani et al., 2020	HMI-11	37°C	Bloodstream	T. brucei brucei	53432726	40233092	75.2967	18608445	34.8259	59	1.017	1.017	1.017	1.034	1	0.9831	1	1.034	1	1	1
ERR3562604	PRJEB34627	Giordani et al., 2020	HMI-11	37°C	Bloodstream	T. brucei brucei	90586426	65004446	71.7596	25066690	27.6716	81	1	1.012	1	1.021	1	0.9756	1	1.012	0.9878	1	1
ERR4179423	PRJEB38510	NA	NA	NA	NA	T. brucei	36177952	29109184	80.4611	15215554	42.0575	69	1.014	1.007	1	1.029	1	0.9855	1	1.014	1	1	1
ERR4179424	PRJEB38510	NA	NA	NA	NA	T. brucei	35961611	28437882	79.0784	14672531	40.8005	65	1.015	1.015	1.015	1.015	1.015	1.015	1.015	1.015	1	1	1
ERR4179425	PRJEB38510	NA	NA	NA	NA	T. brucei	36699057	29483045	80.3373	15176608	41.3542	69	1.014	1.014	1.014	1.014	1.014	1	1	1.014	1	1	1
ERR4179426	PRJEB38510	NA	NA	NA	NA	T. brucei	32562104	26338556	80.8871	14077425	43.2325	63	1	1.016	1	1.016	1.381	0.9683	1	1.016	0.9841	1	1
ERR4179427	PRJEB38510	NA	NA	NA	NA	T. brucei	36360065	28926026	79.5544	14854021	40.8526	66	1	1	1.015	1.015	1.015	1	1	1	1	1	1
ERR4833470	PRJEB41308	Mulindwa et al., 2021	HMI-9	NA	Bloodstream	T. brucei brucei	262000000	224000000	85.6975	40898309	15.6278	142	1	1.007	1.007	1.007	1	1.007	1.007	1	1.007	1	1
ERR4833471	PRJEB41308	Mulindwa et al., 2021	HMI-9	NA	Bloodstream	T. brucei brucei	305000000	243000000	79.6025	41434163	13.5879	144	0.9931	0.9931	1	1	1.028	0.9862	0.9931	1	0.9931	1	1
ERR4833472	PRJEB41308	Mulindwa et al., 2021	HMI-9	NA	Bloodstream	T. brucei brucei	273000000	202000000	74.051	38369904	14.0318	130	0.9924	1.008	1.045	1.015	1.098	1.015	0.9773	0.9924	1	0.9848	0.9924
ERR5050121	PRJEB42356	NA	NA	NA	NA	T. brucei	37717141	29417896	77.9961	14255474	37.7957	64	1	1	1.016	1.016	1	1	1	1	1	1	1
ERR5050122	PRJEB42356	NA	NA	NA	NA	T. brucei	37269874	29882819	80.1796	14573365	39.1023	65.5	1.015	1	1	1.03	1	0.9697	1	1.015	1	1	1
ERR5050123	PRJEB42356	NA	NA	NA	NA	T. brucei	38067303	30085924	79.0335	14568579	38.2706	65	1	1	1	1.015	1	1	1	1	0.9848	1	1
ERR5050124	PRJEB42356	NA	NA	NA	NA	T. brucei	39530085	31267629	79.0983	15453095	39.092	69	1.014	1	1	1.014	0.9929	0.9857	1	1.014	1	1	1
ERR5693745	PRJEB43606	Cosentino et al., 2021	NA	NA	NA	T. brucei	23429882	19861484	84.7699	7982010	34.0677	34	0.9706	0.9706	0.9706	1	1.206	0.9706	1	1	1	1	1
ERR5693747	PRJEB43606	Cosentino et al., 2021	NA	NA	NA	T. brucei	10731953	8840335	82.374	5782756	53.8835	21	1	0.9773	0.9545	1	0.9545	0.9091	1	1	0.9545	0.9545	1
ERR5917960	PRJEB44916	Mulindwa et al., 2021	HMI-9	NA	Bloodstream	T. brucei brucei	57040324	47956831	84.0753	22573951	39.5754	82	1.012	1	1	1.024	0.988	0.9759	1	1.024	1	1	1.012
ERR5917961	PRJEB44916	Mulindwa et al., 2021	HMI-9	NA	Bloodstream	T. brucei brucei	110000000	93056551	84.8689	32374209	29.5258	118	1	1	1	1.008	0.9917	0.9667	1	1.017	1	1	1
ERR5917962	PRJEB44916	Mulindwa et al., 2021	HMI-9	NA	Bloodstream	T. brucei brucei	67427441	57678207	85.5412	25294658	37.5139	94	1	1	0.9895	1.021	0.9895	0.9579	1	1.032	1	1	1.011
ERR5917963	PRJEB44916	Mulindwa et al., 2021	HMI-9	NA	Bloodstream	T. brucei brucei	61483888	51694016	84.0773	23620541	38.4175	86	1.023	1.011	1	1.023	0.9885	0.9684	1.011	1.034	1	1	1.011
ERR5917964	PRJEB44916	Mulindwa et al., 2021	HMI-9	NA	Bloodstream	T. brucei brucei	202000000	167000000	82.5107	38256730	18.9134	138	1.007	1	1	1.007	1.065	0.9928	1	1.014	1	1	1.007
ERR5917965	PRJEB44916	Mulindwa et al., 2021	HMI-9	NA	Bloodstream	T. brucei brucei	116000000	95802139	82.3289	32069238	27.5591	117	1.009	1	1	1.017	1.145	0.9829	1	1.017	1	1	1.009
ERR5919253	PRJEB44927	Mulindwa et al., 2021	HMI-9	NA	Bloodstream	T. brucei brucei	273000000	202000000	74.051	38369904	14.0318	130	0.9924	1.008	1.045	1.015	1.098	1.015	0.9773	0.9924	1	0.9848	0.9924
ERR688817	PRJEB7849	Marques et al., 2015	NA	NA	NA	T. brucei	7782541	6774842	87.0518	4455349	57.248	39	1.075	1	1.012	1	1.025	1.05	1	1	1	1	1
ERR688818	PRJEB7849	Marques et al., 2015	NA	NA	NA	T. brucei	8043132	7057325	87.7435	4435833	55.1506	39	1.15	1.025	1.025	1.05	1.025	1.025	0.975	1.025	0.975	1	0.975
ERR688819	PRJEB7849	Marques et al., 2015	NA	NA	NA	T. brucei	7663899	7180487	93.6924	4645939	60.6211	43	1.182	1.023	1.023	1.114	0.9773	0.9318	0.9602	1.068	0.9773	1	1.023
ERR688820	PRJEB7849	Marques et al., 2015	NA	NA	NA	T. brucei	8191651	7584810	92.592	4857295	59.2957	46	1.065	1.022	1	1	1.022	1.022	1	1	1	1	1
ERR979869	PRJEB2486	NA	NA	NA	NA	T. brucei gambiense	10972553	8648744	78.8216	5644551	51.4425	35	1.057	1	1.029	1.029	1	1	1	1.029	1	1	1
ERR979870	PRJEB2486	NA	NA	NA	NA	T. brucei gambiense	6308329	5497602	87.1483	3835681	60.8034	23	1	1	1	1	1	0.9583	0.9583	1	1	1	0.9583
ERR979871	PRJEB2486	NA	NA	NA	NA	T. brucei gambiense	11604176	10211819	88.0012	6660348	57.3961	40	1.012	1	1	1.024	1.415	0.9756	0.9756	1	0.9756	0.9756	0.9756
ERR979872	PRJEB2486	NA	NA	NA	NA	T. brucei gambiense	11961933	9440051	78.9174	6092856	50.9354	38	1.053	1	1.026	1.053	1	1	1	1.026	1	1	1
SRR14194808	PRJNA720808	Oldrieve et al., 2021	HMI-9	NA	Bloodstream	T. brucei brucei	7317123	6192976	84.6368	3693448	50.4768	23	1.043	1	1	1	1	0.9565	1	1	1	1	1
SRR17479764	PRJNA795331	Kay et al., 2022	CM	27°C	Procyclic	T. brucei brucei	104000000	91593273	87.8318	32417257	31.086	216	1.023	1.014	1.014	1.018	1.005	0.9862	1	1.014	0.9954	1	1
SRR17479765	PRJNA795331	Kay et al., 2022	CM	27°C	Procyclic	T. brucei brucei	114000000	99433304	87.5699	33275573	29.3055	219	1.027	1.009	1.014	1.023	1.005	0.9864	1	1.009	1.082	0.9955	0.9909
SRR17479766	PRJNA795331	Kay et al., 2022	CM	27°C	Procyclic	T. brucei brucei	122000000	108000000	88.6456	34725310	28.4717	230	1.009	1.006	1.004	1.013	0.9957	1.017	0.9957	1.004	1.043	0.987	0.9957
SRR17479767	PRJNA795331	Kay et al., 2022	CM	27°C	Procyclic	T. brucei brucei	101000000	88057860	87.0815	31635265	31.2845	210	1.009	1.009	1.014	1.014	1.005	0.9905	1	1.009	0.9953	1	1
SRR1755080	PRJNA272153	Richardson et al., 2015	NA	NA	NA	T. brucei gambiense	15332062	12378199	80.7341	7973846	52.0077	23	0.8696	0.913	1	1.043	0.9565	0.9565	0.9565	1	0.9565	1	1.043
SRR1757506	PRJNA272153	Richardson et al., 2015	NA	NA	NA	T. brucei gambiense	18207463	15339633	84.2492	9492483	52.1351	27	0.8148	0.8889	1	1	0.9259	0.8889	0.963	1.111	0.963	1.111	1.074
SRR3143433	PRJNA310248	Sistrom et al., 2016	NA	NA	NA	T. brucei rhodesiense	38129233	28129709	73.7746	13316082	34.9235	41	0.9762	1	1	1	1	1.024	0.9762	0.9762	1	1	1
SRR5307969	PRJNA377710	Cuypers et al., 2017	Non-cultured	NA	NA	T. brucei gambiense	11033248	9626477	87.2497	4796072	43.4693	53	1.019	1.019	0.9815	1.019	0.9815	0.963	1	1.019	1	1	1
SRR6052131	PRJNA407592	Richardson et al., 2017	NA	NA	NA	T. brucei rhodesiense	15618301	12093030	77.4286	7233493	46.3142	23	1	1	1	1	0.9565	0.9565	0.9565	1	0.9565	1	1
SRR6052132	PRJNA407592	Richardson et al., 2017	NA	NA	NA	T. brucei rhodesiense	20886852	15347963	73.4815	8930374	42.756	28.5	1	0.9655	1	1	1	1	1	1	1	1	1
SRR6052134	PRJNA407592	Richardson et al., 2017	NA	NA	NA	T. brucei brucei	18553327	14551350	78.4299	8614348	46.4302	27	1.037	1	1	1	1	1	1	1	1	1	1
SRR6052135	PRJNA407592	Richardson et al., 2017	NA	NA	NA	T. brucei brucei	16296471	12783537	78.4436	7608374	46.6872	24	1	1	1	1	0.9583	0.9583	1	1	1	1	1
SRR6052136	PRJNA407592	Richardson et al., 2017	NA	NA	NA	T. brucei rhodesiense	13481907	10978203	81.4292	6865294	50.9223	22	1.045	1	1	1	1	1	1	1	1	1	1
SRR6052137	PRJNA407592	Richardson et al., 2017	NA	NA	NA	T. brucei rhodesiense	21925314	19837709	90.4786	11681538	53.2788	39	1.026	1.026	1.026	1.026	1	1	1	1.026	1	1	1
SRR6052138	PRJNA407592	Richardson et al., 2017	NA	NA	NA	T. brucei rhodesiense	16947827	13500450	79.6589	8235797	48.595	26	1.038	1	1	1.038	1	1	1	1.038	1	1	1.038
SRR6052139	PRJNA407592	Richardson et al., 2017	NA	NA	NA	T. brucei rhodesiense	11465011	9134457	79.6725	5432723	47.3852	17	1.059	1	1	1	1	1	1	1	1	1	1
SRR6052140	PRJNA407592	Richardson et al., 2017	NA	NA	NA	T. brucei rhodesiense	16591967	13332159	80.3531	7996431	48.1946	26	1.038	1	1	1.038	1	1	1	1	1	1	1
SRR6052141	PRJNA407592	Richardson et al., 2017	NA	NA	NA	T. brucei brucei	32786973	24508285	74.7501	12167964	37.1122	37	1	1	1	1	0.9737	1.026	0.9737	0.9737	1	0.9737	0.9737
SRR6052142	PRJNA407592	Richardson et al., 2017	NA	NA	NA	T. brucei rhodesiense	38127734	28128208	73.7736	13316080	34.9249	41	0.9762	1	1	1	1	1.024	0.9762	0.9762	1	1	1
SRR6052143	PRJNA407592	Richardson et al., 2017	NA	NA	NA	T. brucei rhodesiense	39130554	28718270	73.3909	13396351	34.235	41	0.9762	1	1	1	1	1.024	0.9762	0.9762	1	1	1
SRR6052144	PRJNA407592	Richardson et al., 2017	NA	NA	NA	T. brucei brucei	26273945	19356200	73.6707	9953332	37.8829	30	1.033	1.033	1.033	1.033	1	1.033	1	1	1.033	1	1
SRR6052145	PRJNA407592	Richardson et al., 2017	NA	NA	NA	T. brucei rhodesiense	12882567	9792804	76.0159	5910538	45.8801	18	1.056	1	1	1	1	1	1	1	1	1	1
SRR6052146	PRJNA407592	Richardson et al., 2017	NA	NA	NA	T. brucei rhodesiense	13829040	11204476	81.0214	6999543	50.6148	22	1	1	1	1	1	1	1	1	1	1	1
SRR6052147	PRJNA407592	Richardson et al., 2017	NA	NA	NA	T. brucei rhodesiense	20684719	17191541	83.1123	9911939	47.9191	31	1	1	1.032	1	1	1.032	1	1	1.032	1	1.032
SRR6052148	PRJNA407592	Richardson et al., 2017	NA	NA	NA	T. brucei rhodesiense	18258090	15031903	82.3301	9019166	49.3982	29	1	1	1	1	1	1	1	1	1	1	1
SRR6052149	PRJNA407592	Richardson et al., 2017	NA	NA	NA	T. brucei rhodesiense	12981869	10620492	81.8102	6825001	52.5733	21	0.9545	1	1	1	1	1	1	1	1	1	1
SRR6052150	PRJNA407592	Richardson et al., 2017	NA	NA	NA	T. brucei rhodesiense	21582483	16735852	77.5437	9574912	44.3643	31	1	1	1	1.016	1	1	1	1	1	1	1
SRR6052151	PRJNA407592	Richardson et al., 2017	NA	NA	NA	T. brucei rhodesiense	19525013	15486100	79.3142	9106949	46.6425	29	1.034	1	1	1.034	1	1	1	1	1	1	1
SRR6052152	PRJNA407592	Richardson et al., 2017	NA	NA	NA	T. brucei rhodesiense	15321491	12364091	80.6977	7486557	48.8631	23	1	1	1	1	1	1.043	1	1	1	1	1
SRR6052153	PRJNA407592	Richardson et al., 2017	NA	NA	NA	T. brucei rhodesiense	15890295	12626982	79.4635	7759628	48.8325	24	1.042	1.042	1.042	1	1.042	1.042	1	1	1.042	1	1.042
SRR6052154	PRJNA407592	Richardson et al., 2017	NA	NA	NA	T. brucei rhodesiense	18942162	14140824	74.6526	8360748	44.1383	26	1	0.9615	1	1	1	1	0.9615	1	1	1	1
SRR6052155	PRJNA407592	Richardson et al., 2017	NA	NA	NA	T. brucei rhodesiense	18218491	14847748	81.4982	8924234	48.9845	29	1	1	1	1	1	1	1	1	1	1	1
SRR7910035	PRJNA477427	Davaasuren et al., 2019	HMI-9	37°C	NA	T. equiperdum	49520882	42291188	85.4007	20994956	42.3962	221	1.018	1.018	1.036	1.022	1.002	1.022	0.9955	1.004	0.9955	0.991	0.9955
SRR8840784	PRJNA530667	Cooper et al., 2019	HMI-9	NA	Bloodstream	T. brucei	8486059	6017195	70.9068	3287061	38.7348	28	1.071	1.036	1	1	1	1	1	1	1	1	1
SRR8840785	PRJNA530667	Cooper et al., 2019	HMI-9	NA	Bloodstream	T. brucei	7208265	5243761	72.7465	3042737	42.2118	27	1.111	1.019	1	1	1	1.037	1	1	1	1	1
SRR8840786	PRJNA530667	Cooper et al., 2019	HMI-9	NA	Bloodstream	T. brucei	7948515	6352370	79.9189	3492830	43.9432	29	1.067	1	1	0.9667	1	1	1	0.9667	0.9667	1	0.9667
SRR8840787	PRJNA530667	Cooper et al., 2019	HMI-9	NA	Bloodstream	T. brucei	7061810	5807421	82.237	3171714	44.9136	26	1.074	1	1	1	1	1	1	0.963	1	0.963	0.963

[truncated: 3 more sheets: T.congolense, T.cruzi, T.vivax]
