# Supplementary material for: Ancestral aneuploidy and stable chromosomal duplication resulting in differential genome structure and gene expression control in trypanosomatid parasites
Source: Genome Res. 2024 Mar;34(3):441–53. doi: 10.1101/gr.278550.123 (PMC11067883; doi:10.1101/gr.278550.123)
Supplement: Supplement 13 [file Supplemental_Table_S3.xlsx]

## Sheet: Plan1
Supplementary Table 3: Origin of each predicted proteome used in the phylogeny estimations.
Evaluated Organism	Database of Origin	Phylogeny tree ID
Bodo_saltans_strain_Lake_Konstanz	TriTrypDB_v55	Bsaltans
Crithidia_fasciculata_strain_Cf-Cl	TriTrypDB_v55	Cfasciculata
Endotrypanum_monterogeii_strain_LV88	TriTrypDB_v55	Emonterogeii
Leishmania_donovani_strain_LV9	TriTrypDB_v55	Ldonovani
Leishmania_major_strain_Friedlin	TriTrypDB_v55	Lmajor
Leptomonas_pyrrhocoris_H10	TriTrypDB_v55	Lpyrrhocoris
Paratrypanosoma_confusum_CUL13	TriTrypDB_v55	Pconfusum
Porcisia_hertigi_MCOE/PA/1965/C119	TriTrypDB_v55	Phertigi
Trypanosoma_brucei_brucei_TREU927	TriTrypDB_v55	Tbrucei
Trypanosoma_congolense_IL3000	TriTrypDB_v55	Tcongolense
Trypanosoma_cruzi_CL_Brener_Esmeraldo-like	TriTrypDB_v55	Tcruzi
Trypanosoma_vivax_Y486	TriTrypDB_v55	Tvivax
