# Supplementary material for: Ancestral aneuploidy and stable chromosomal duplication resulting in differential genome structure and gene expression control in trypanosomatid parasites
Source: PubMed Central journal article supplement (PMC11067883; doi:10.1101/gr.278550.123), 2024-03
Supplement: Supplemental_Fig_S3.pdf [file Supplemental_Fig_S3.pdf]

**Supplemental\_Fig\_S3.pdf: Proportion of gene sharing between Leish Chr31 and the chromosomes in other species. A)** Each panel corresponds to a different species. The Y axis corresponds to the number of shared Orthologs + Paralogs in a given chromosome and the *L. major* Leish Chr31. Chromosomes with consistent extra copies and syntenic to *L. major* Leish Chr31 are highlighted in gold, while other chromosomes are represented in blue. Chromosomes/scaffolds with less than 10 ortholog genes with Leish Chr31 were “grouped” in the “others” column, in grey. **B)** Proportion of genes in *L. major* Leish Chr31 have ortholog genes in the other species selected chromosomes **C)** The proportion of genes in a given chromosome that have orthologs in *L. major* Leish Chr31 **D)** Table representing the number of genes (total genes in *L. major* chr 31 = 352) in each Leish Chr31 syntenic chromosome and how many of these genes have orthologs in *L. major* Leish Chr31. **Chr\_genes:** Number of genes in a given chromosome (or combination of chromosomes, as in *Leptomonas*, *C. bombi* and *P. confusum*). Orthologs: How many of these genes have orthologs/Paralogs in *L. major* Leish Chr31. *L. major* Orthologs: How many genes in *L. major* Leish Chr31 have orthologs/paralogs with genes in the other species selected chromosomes. **Prop\_Lmajor:** The proportion of genes in *L. major* Leish Chr31 have orthologs/paralogs with genes in the other species selected chromosomes, **Prop\_Other 31:** The proportion of genes in a given chromosome that have orthologs/Paralogs in *L. major* Leish Chr31.

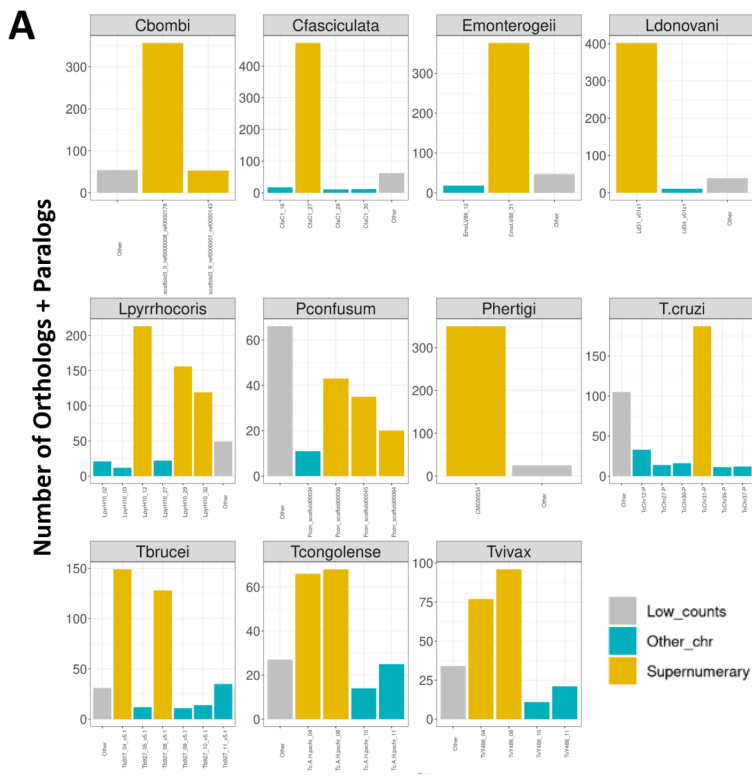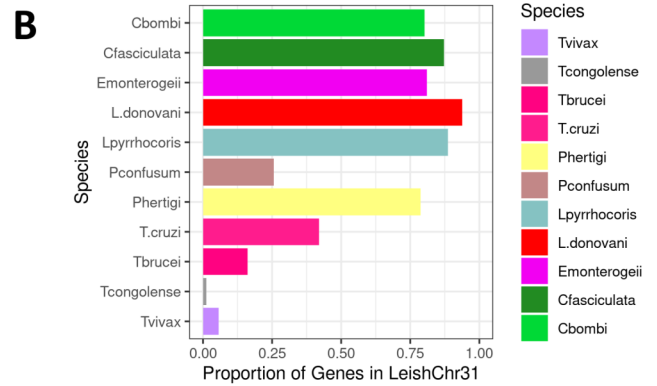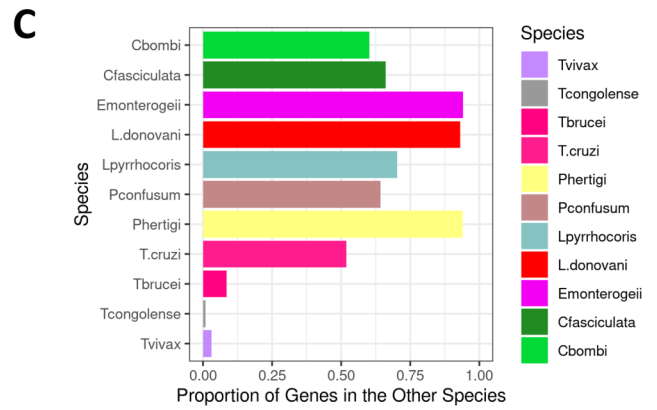

| Species              | Chr                                  | Chr_genes | Orthologs | Lmaj_orthologs | Prop_Lmajor31 | Prop_Other31 |
|----------------------|--------------------------------------|-----------|-----------|----------------|---------------|--------------|
| <b>L.donovani</b>    | Ld31                                 | 332       | 309       | 330            | 0.94          | 0.93         |
| <b>Lpyrrhcoris</b>   | LpyrH10_12 - LpyrH10_29 - LpyrH10_32 | 502       | 353       | 312            | 0.89          | 0.70         |
| <b>Cfasciculata</b>  | CfaC1.27                             | 522       | 345       | 307            | 0.87          | 0.66         |
| <b>Emonterogeeii</b> | EmoLV88.31                           | 303       | 285       | 285            | 0.81          | 0.94         |
| <b>Cbombi</b>        | 0 - 9                                | 490       | 295       | 282            | 0.80          | 0.60         |
| <b>Phertigi</b>      | CM030534.1                           | 295       | 277       | 277            | 0.79          | 0.94         |
| <b>T.cruzi</b>       | TcChr31-P                            | 268       | 139       | 148            | 0.42          | 0.52         |
| <b>Pconfusum</b>     | Pc36 - Pc45 - PC64                   | 140       | 90        | 90             | 0.26          | 0.64         |
| <b>Tbrucei</b>       | Tb927.04 AND Tb927.08                | 1440      | 123       | 57             | 0.16          | 0.09         |
| <b>Tvivax</b>        | TvY486.04 AND TvY486.08              | 1247      | 38        | 20             | 0.06          | 0.03         |
| <b>Tcngolense</b>    | Tc.A.H.pschr_04 AND Tc.A.H.pschr_08  | 1421      | 12        | 4              | 0.01          | 0.01         |
