# Supplementary material for: Ancestral aneuploidy and stable chromosomal duplication resulting in differential genome structure and gene expression control in trypanosomatid parasites
Source: PubMed Central journal article supplement (PMC11067883; doi:10.1101/gr.278550.123), 2024-03

**Supplemental\_Fig\_S4.pdf: Larger representations of the circa plots from figure 3.** Order: *C. bombi*; *C. fasciculata*; *Endotrypanum*; *Leptomonas*; *Paratrypanosoma*; *Porcisia*; *T. cruzi*; *T. brucei*; *T. congolense*; *T. vivax*.

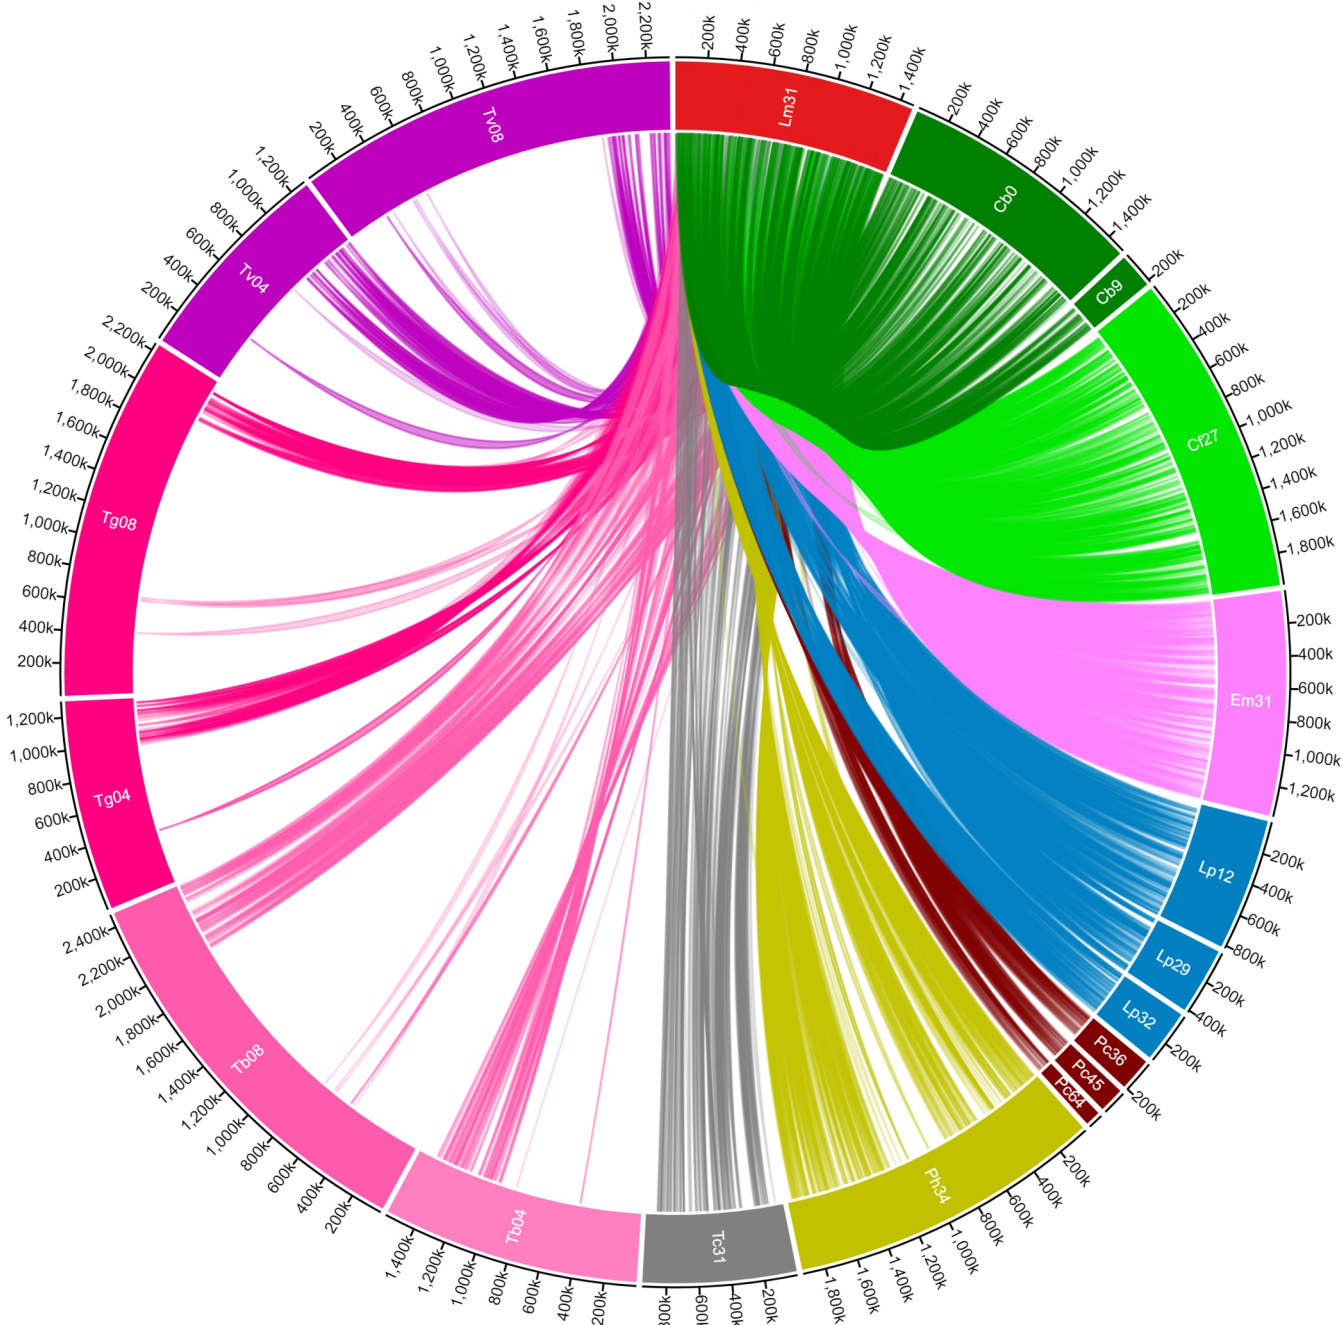

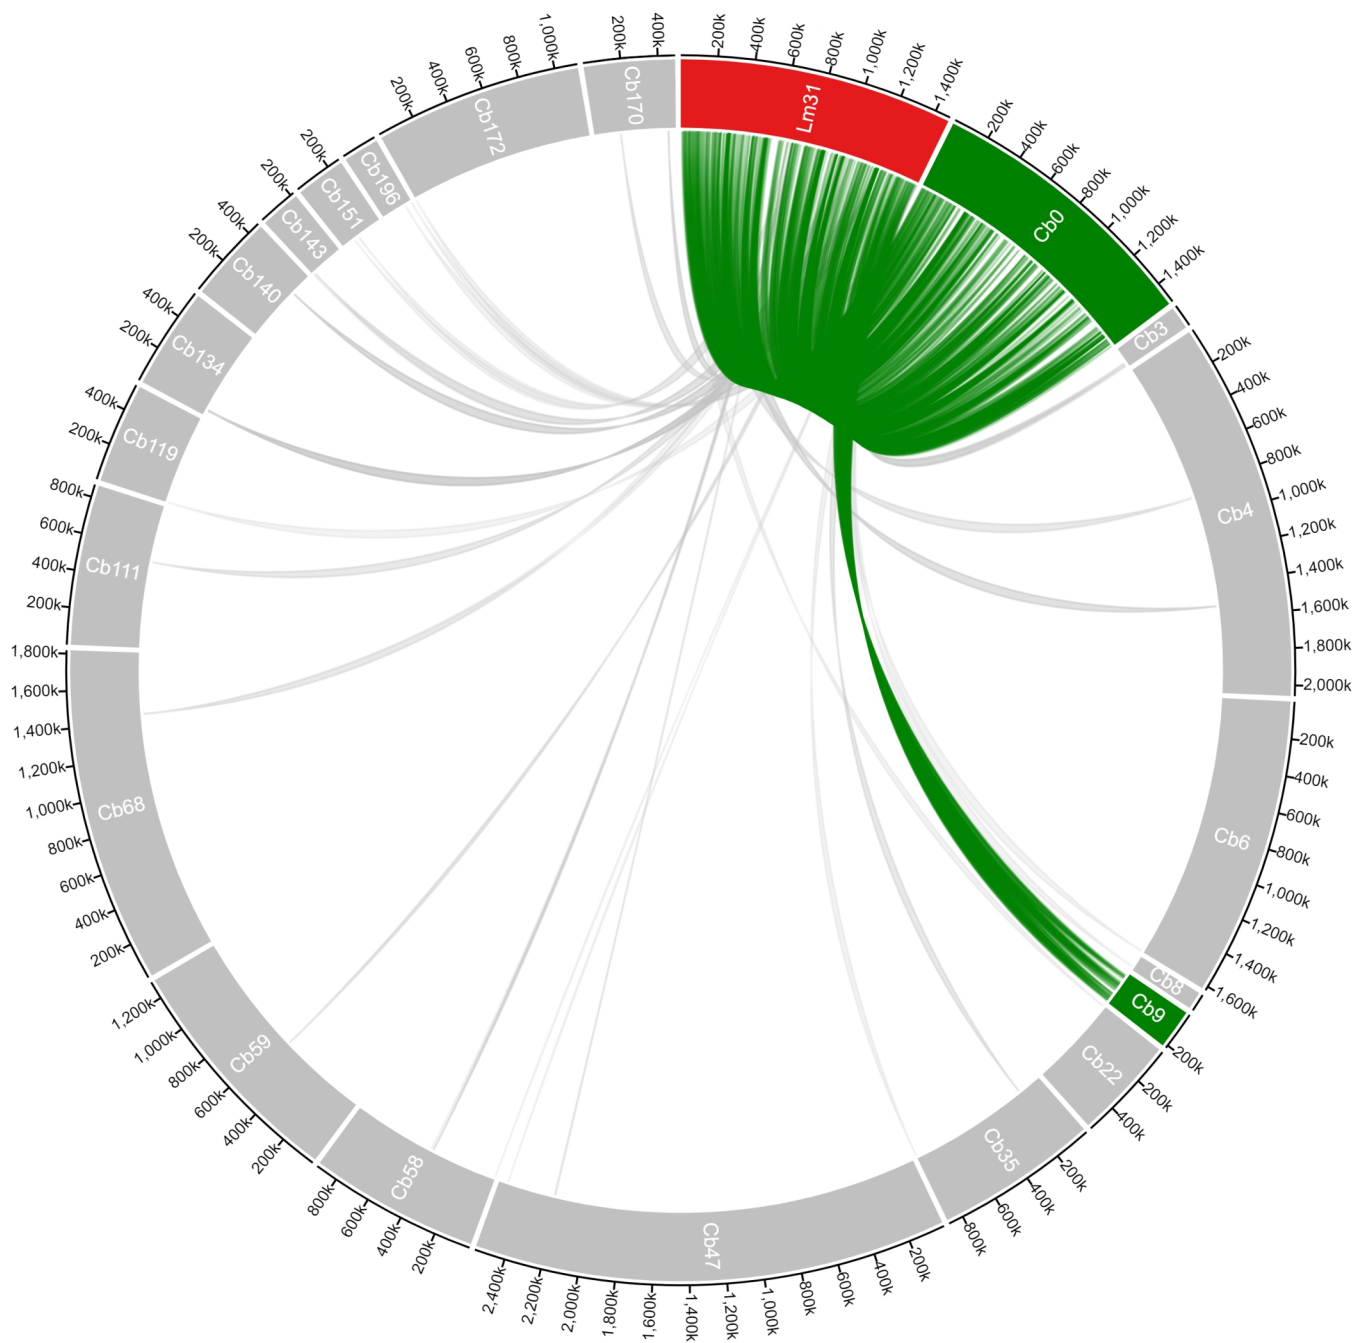

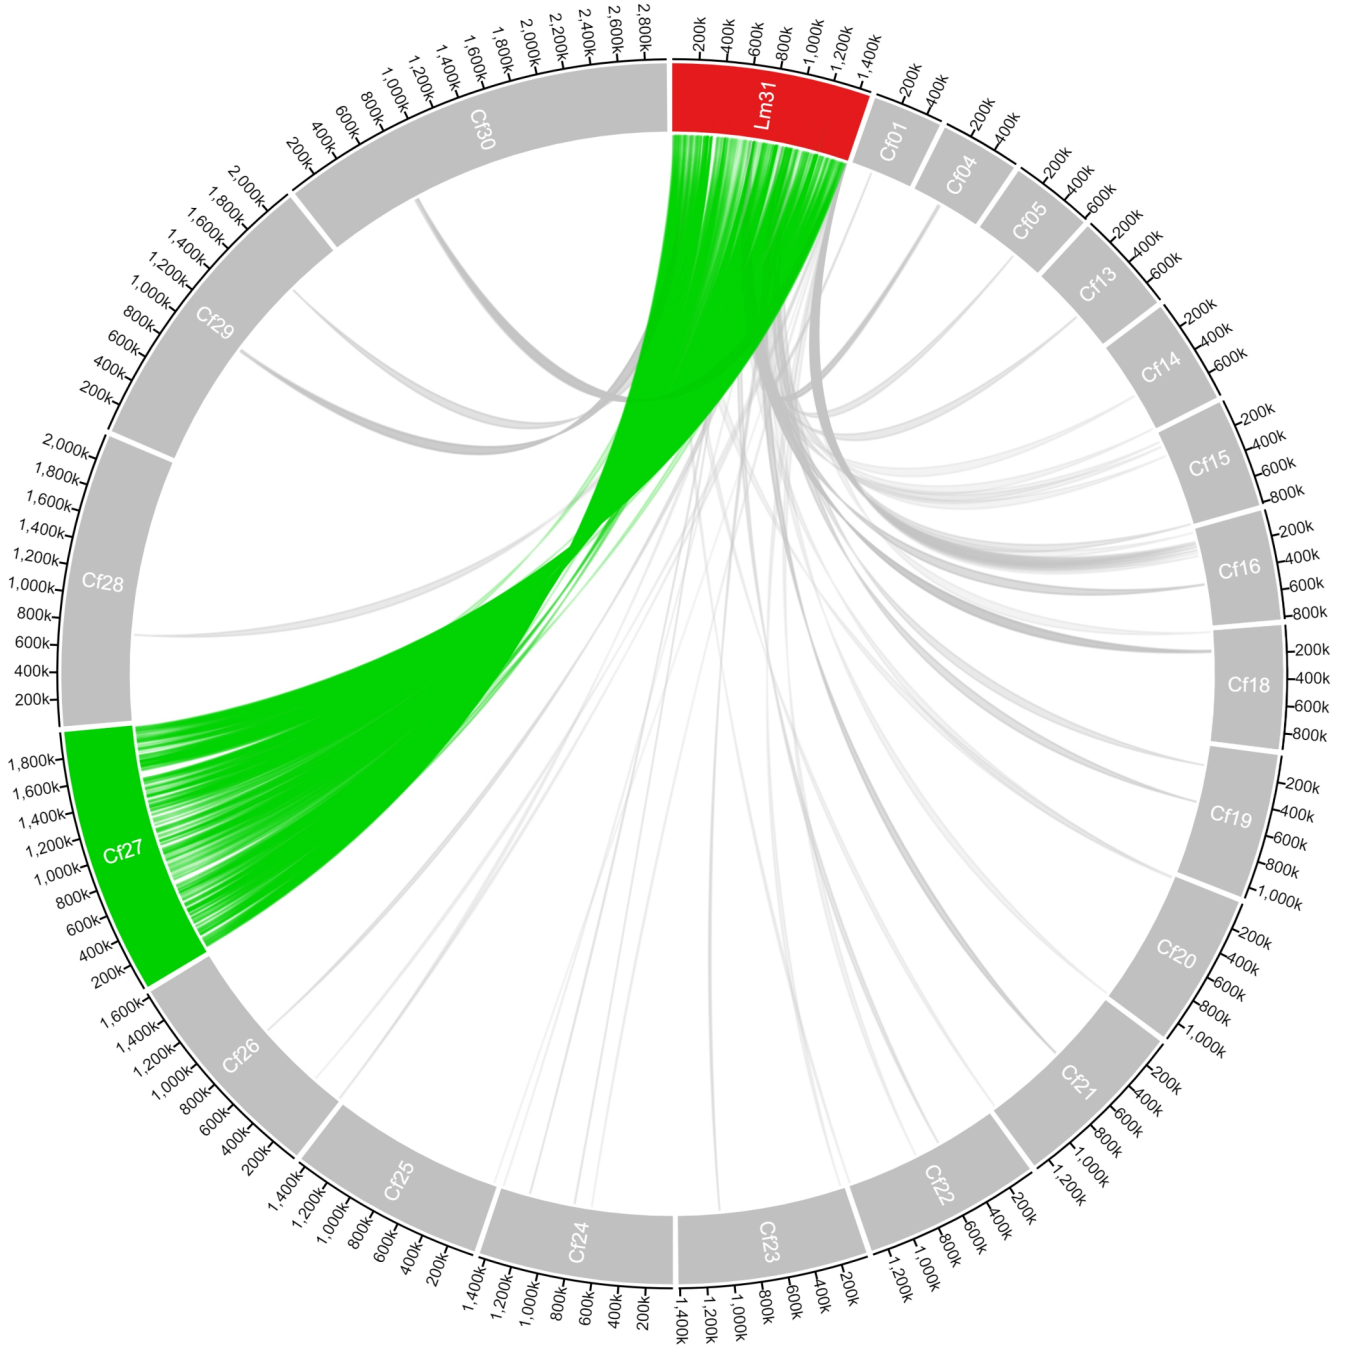

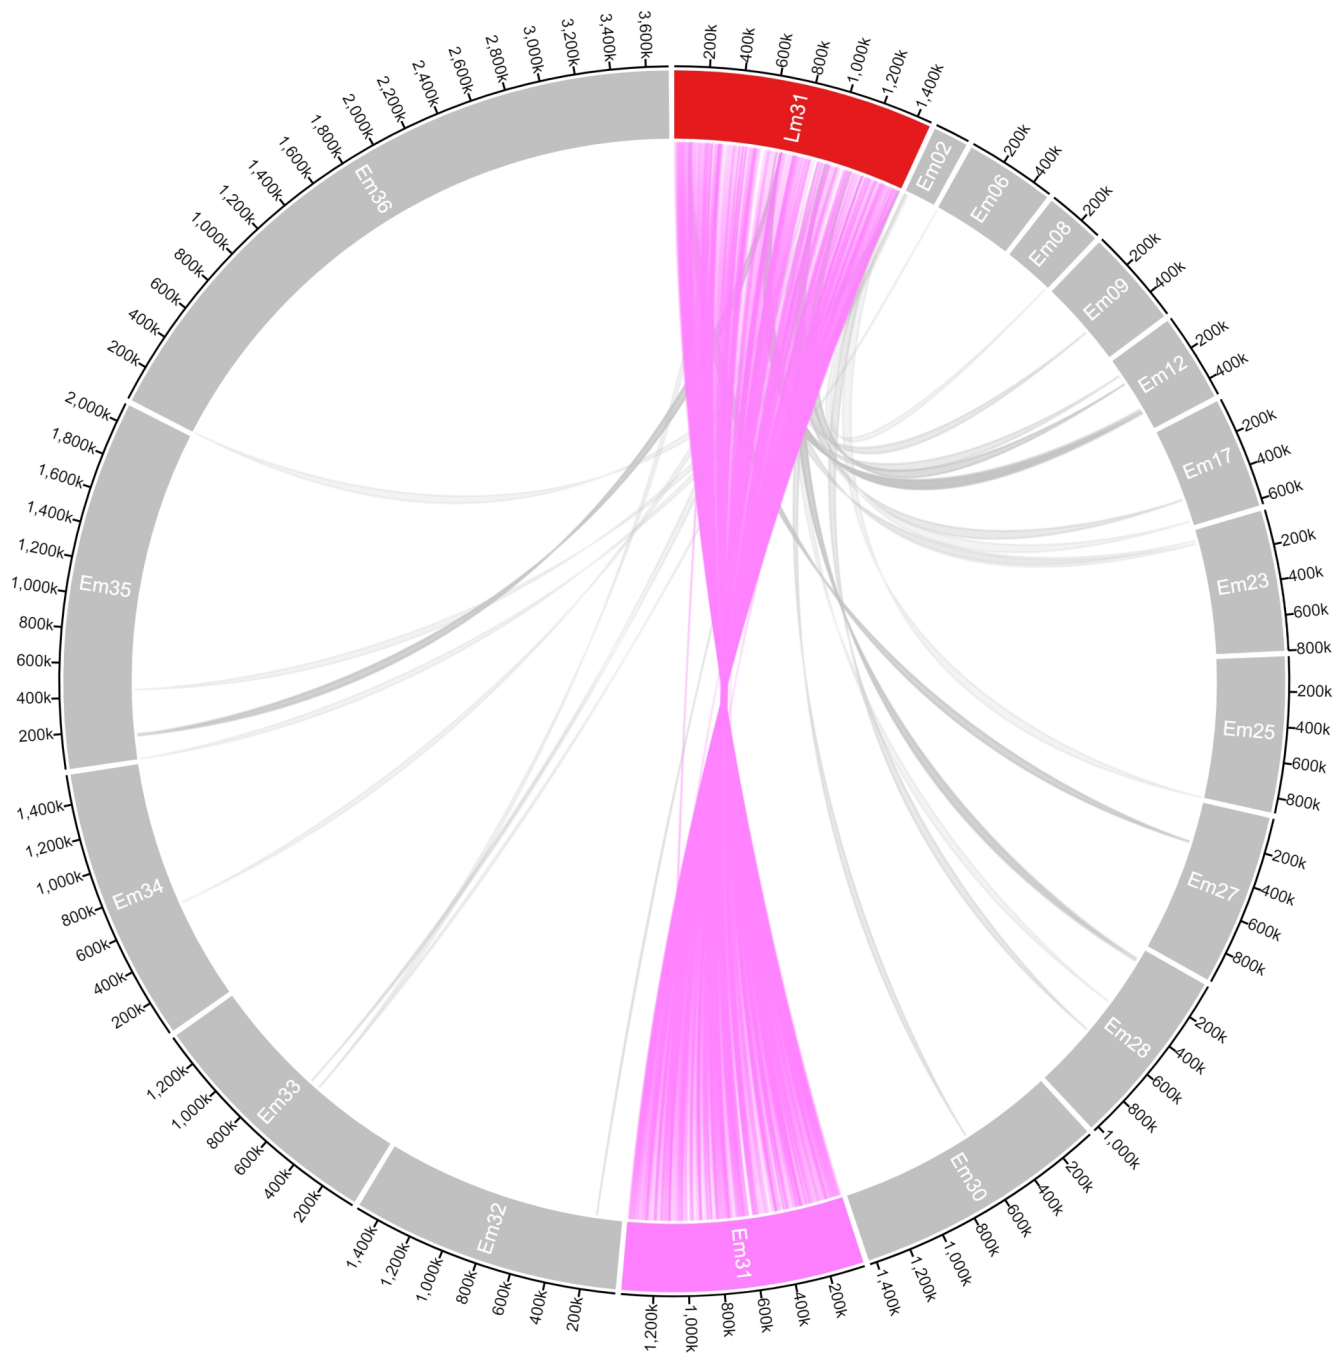



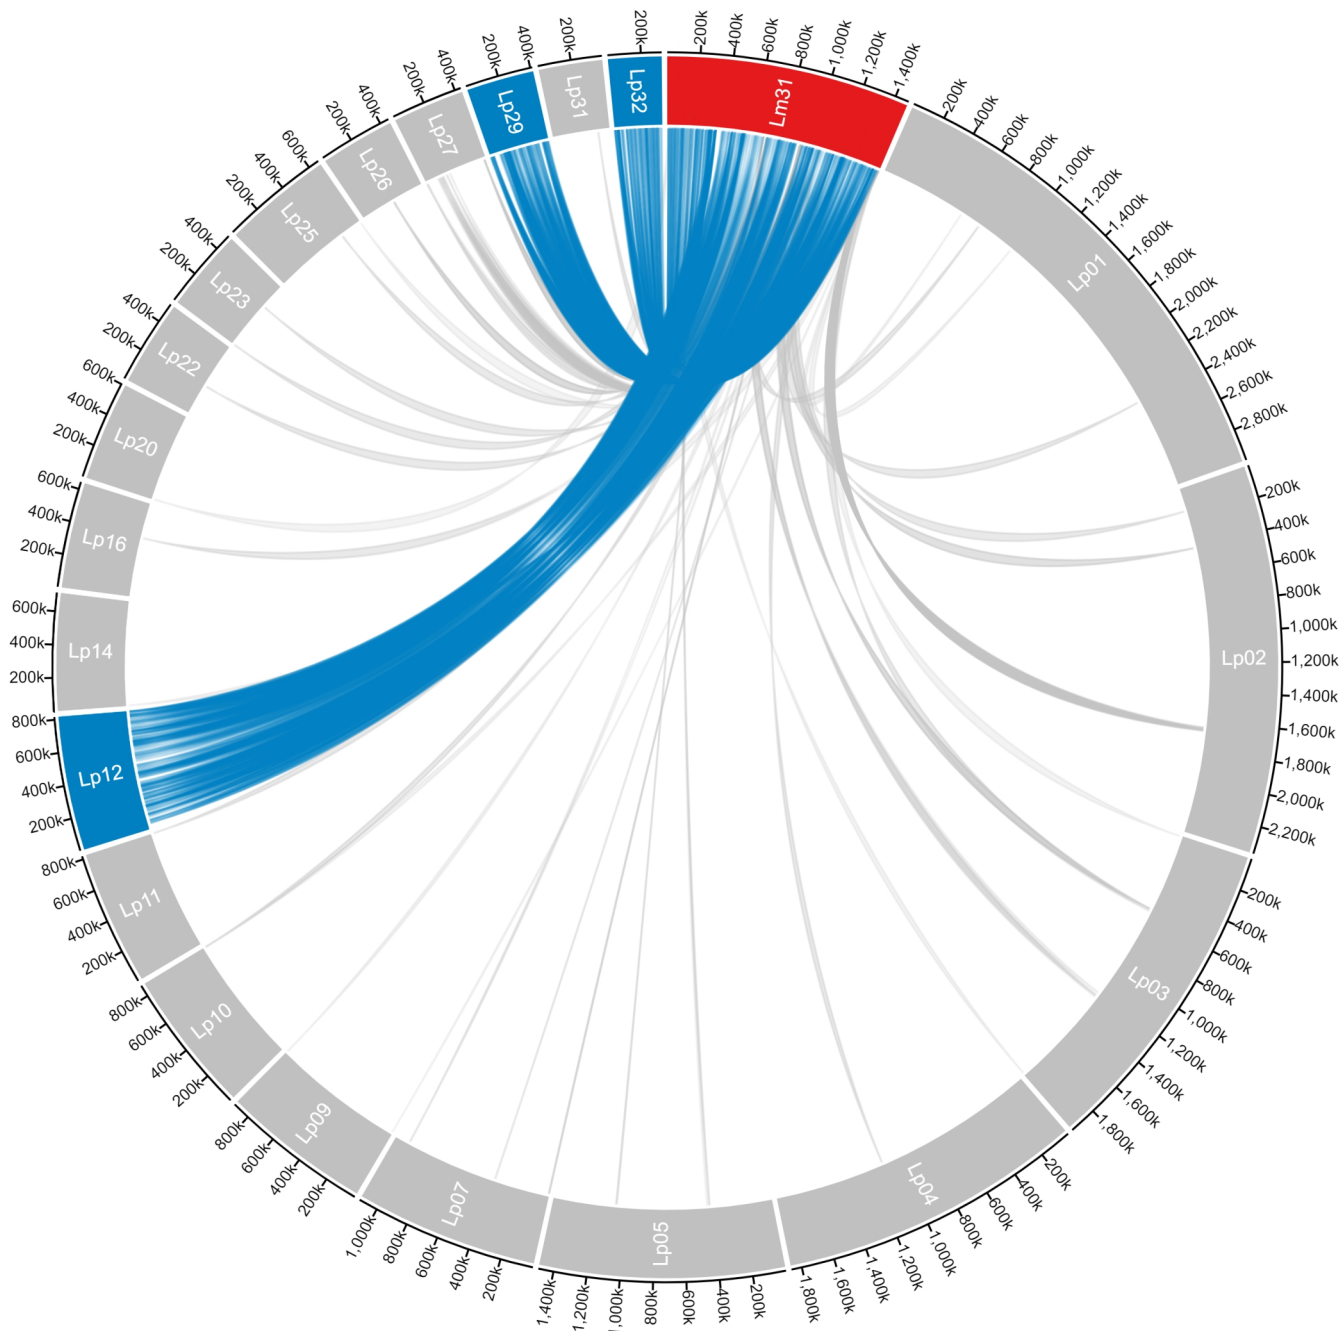

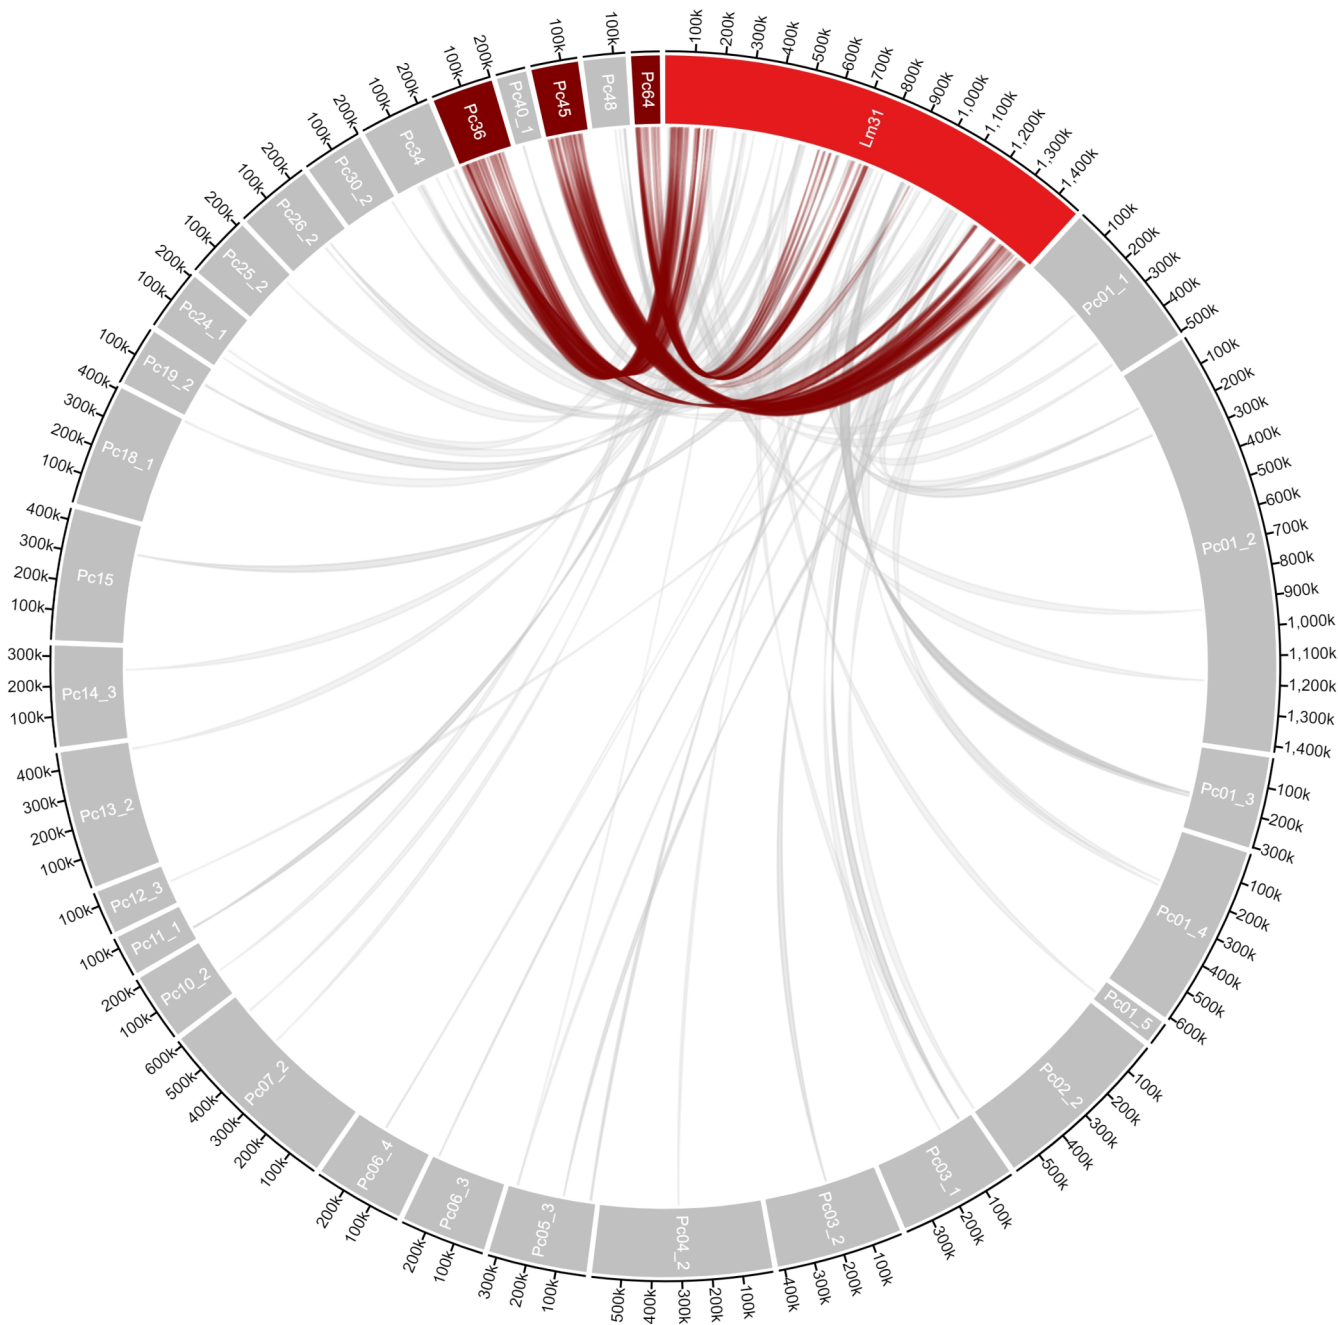

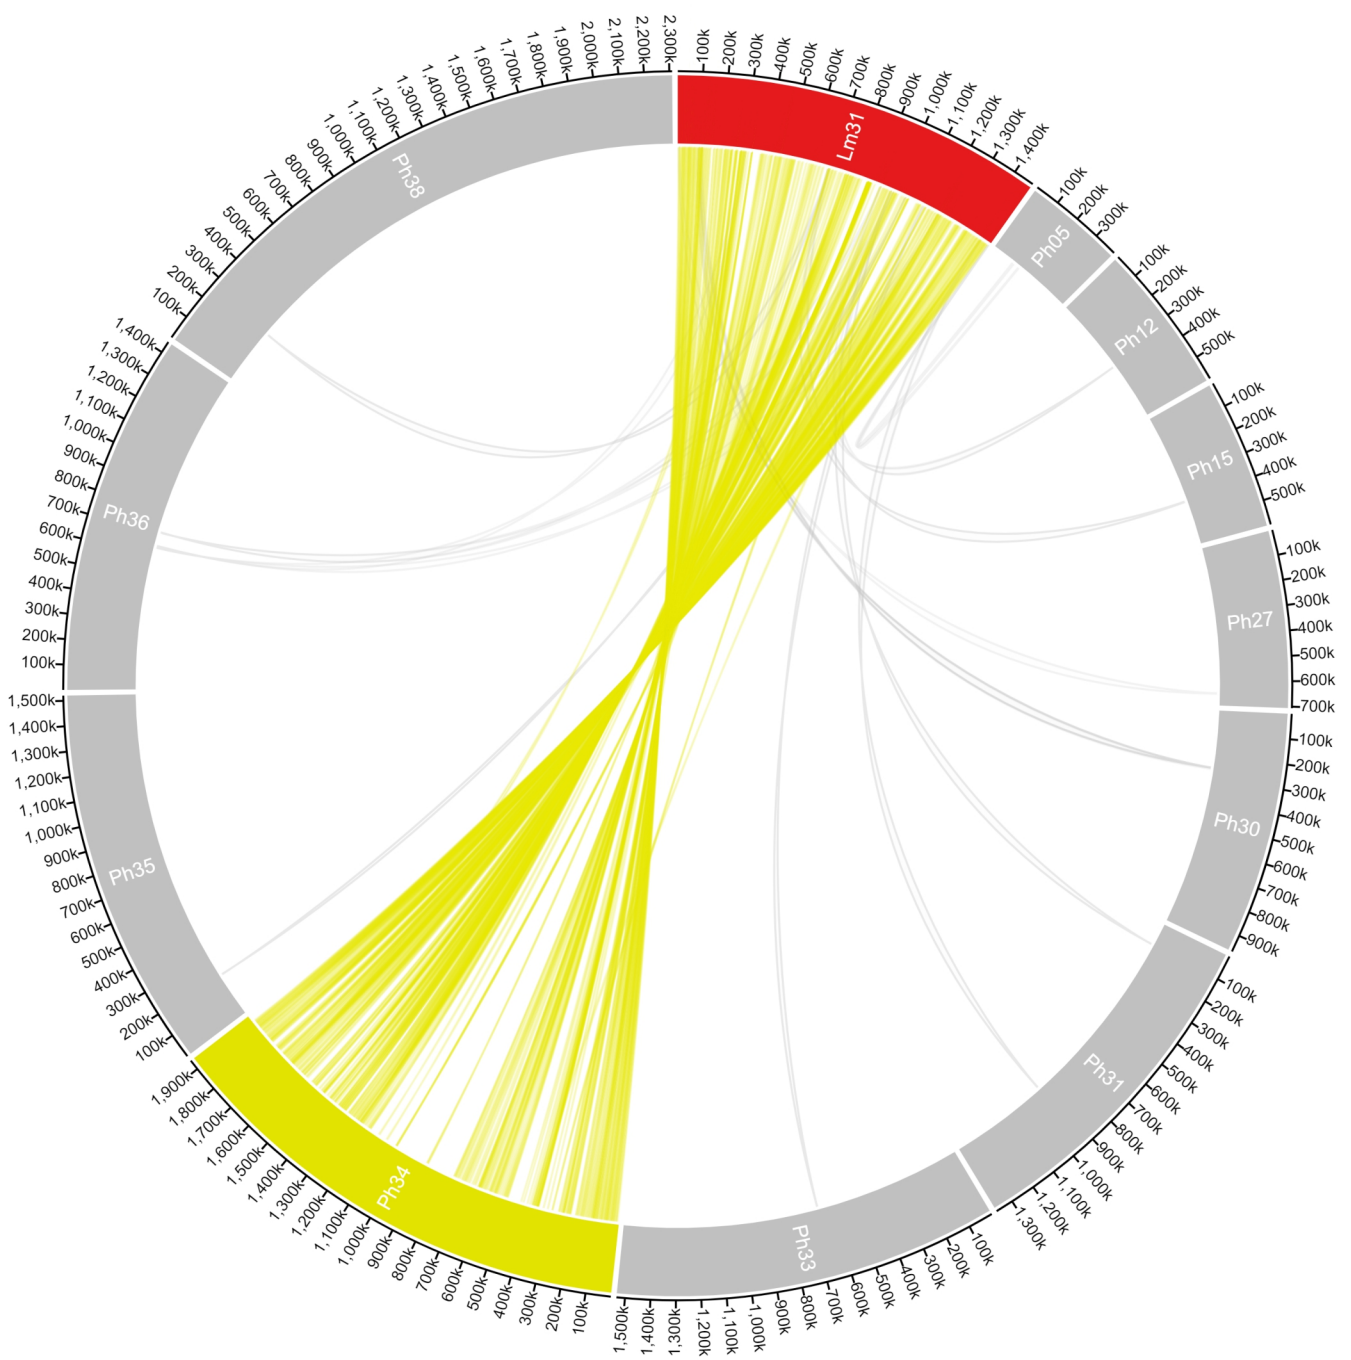

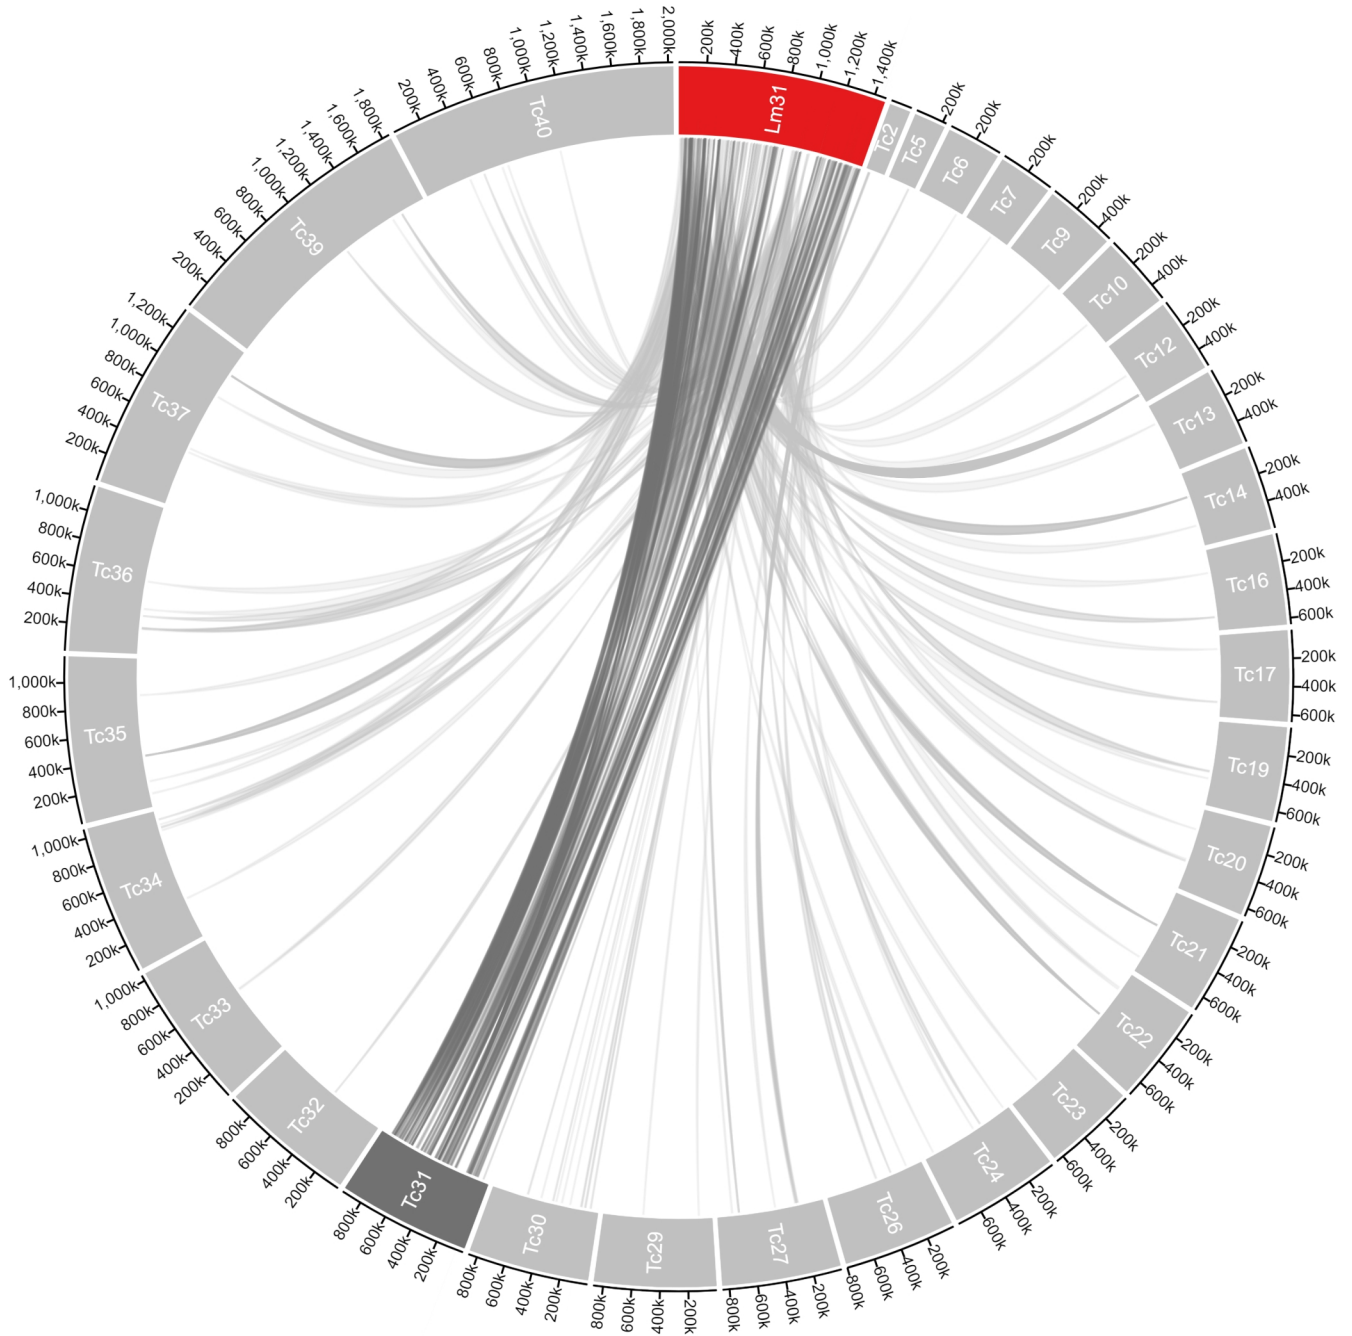



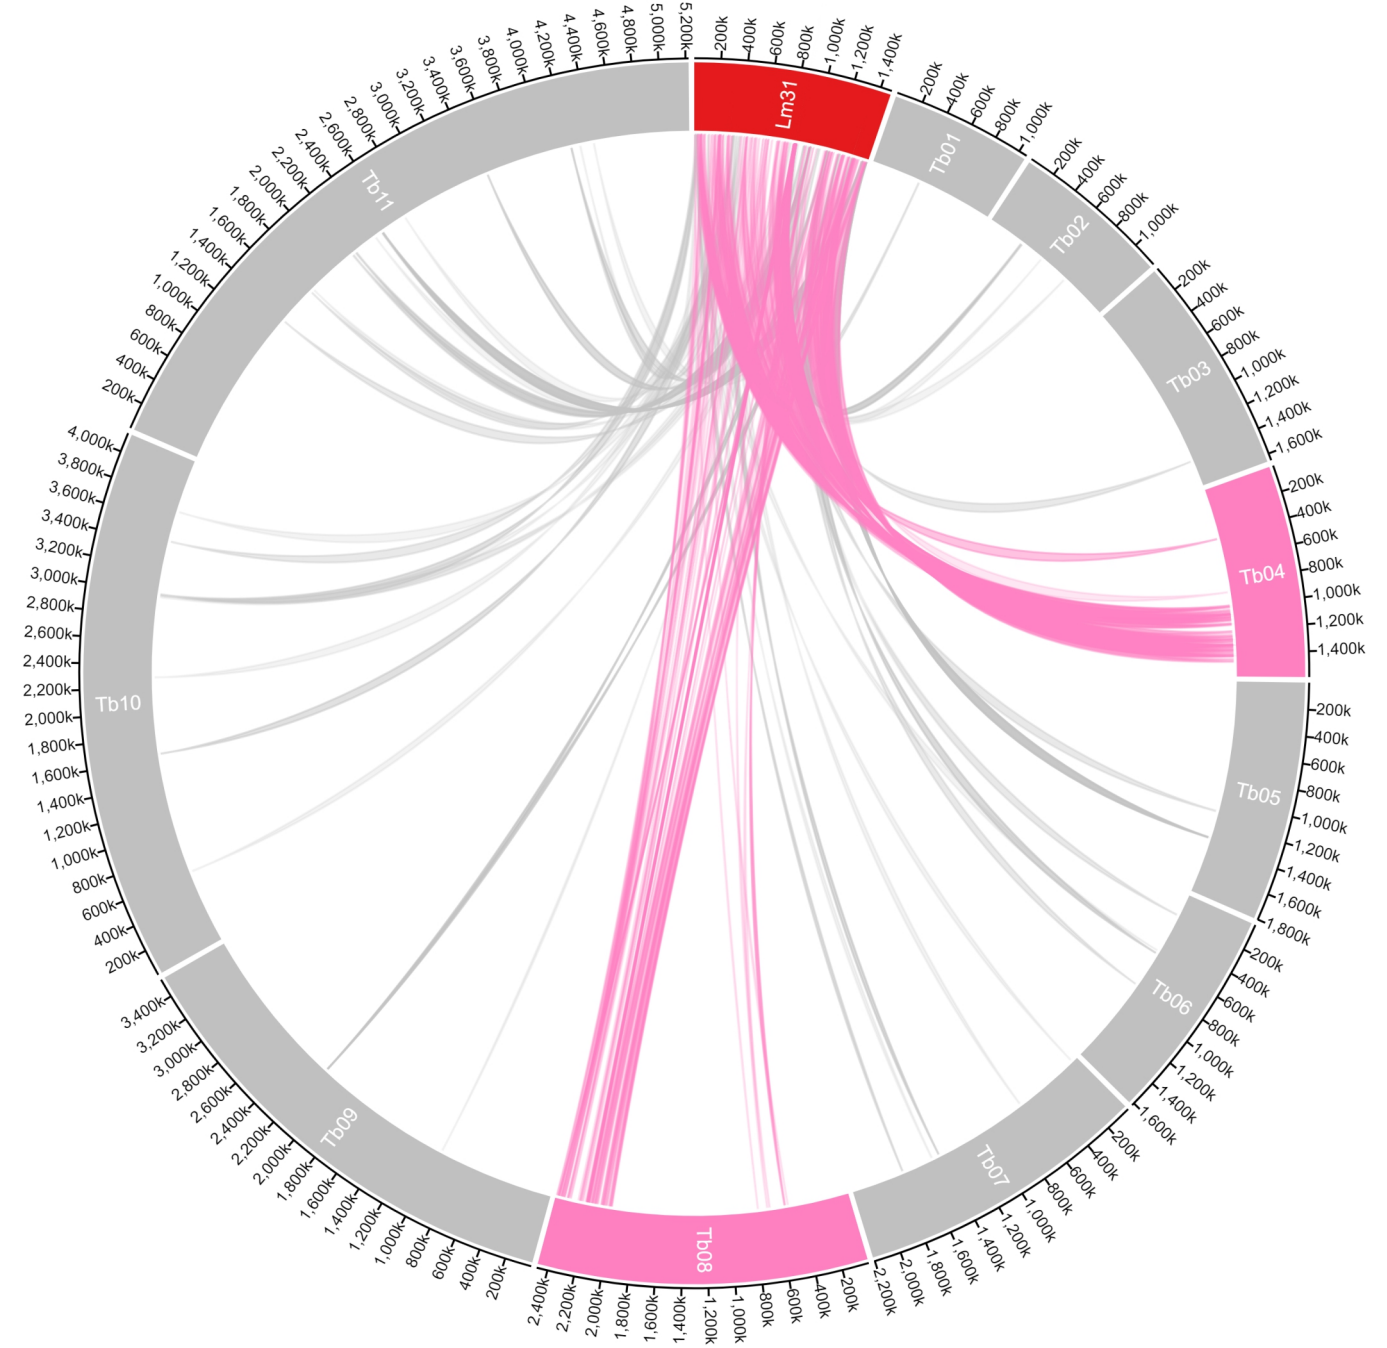

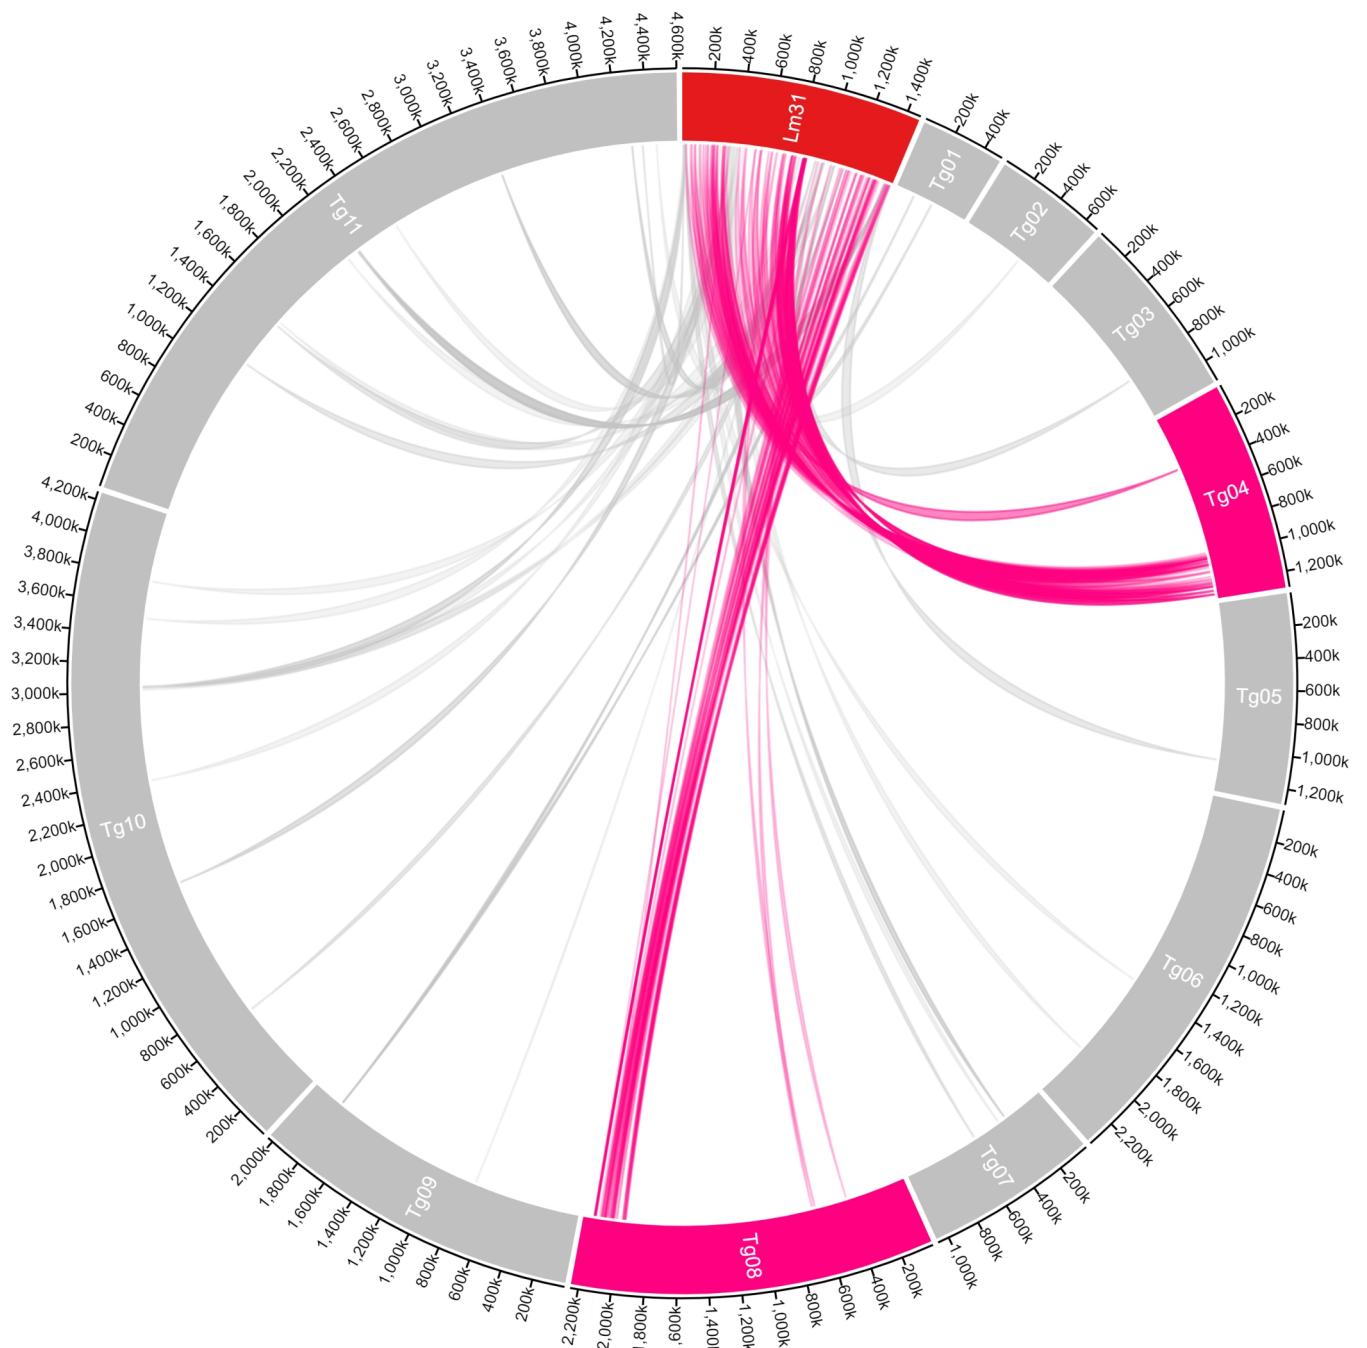

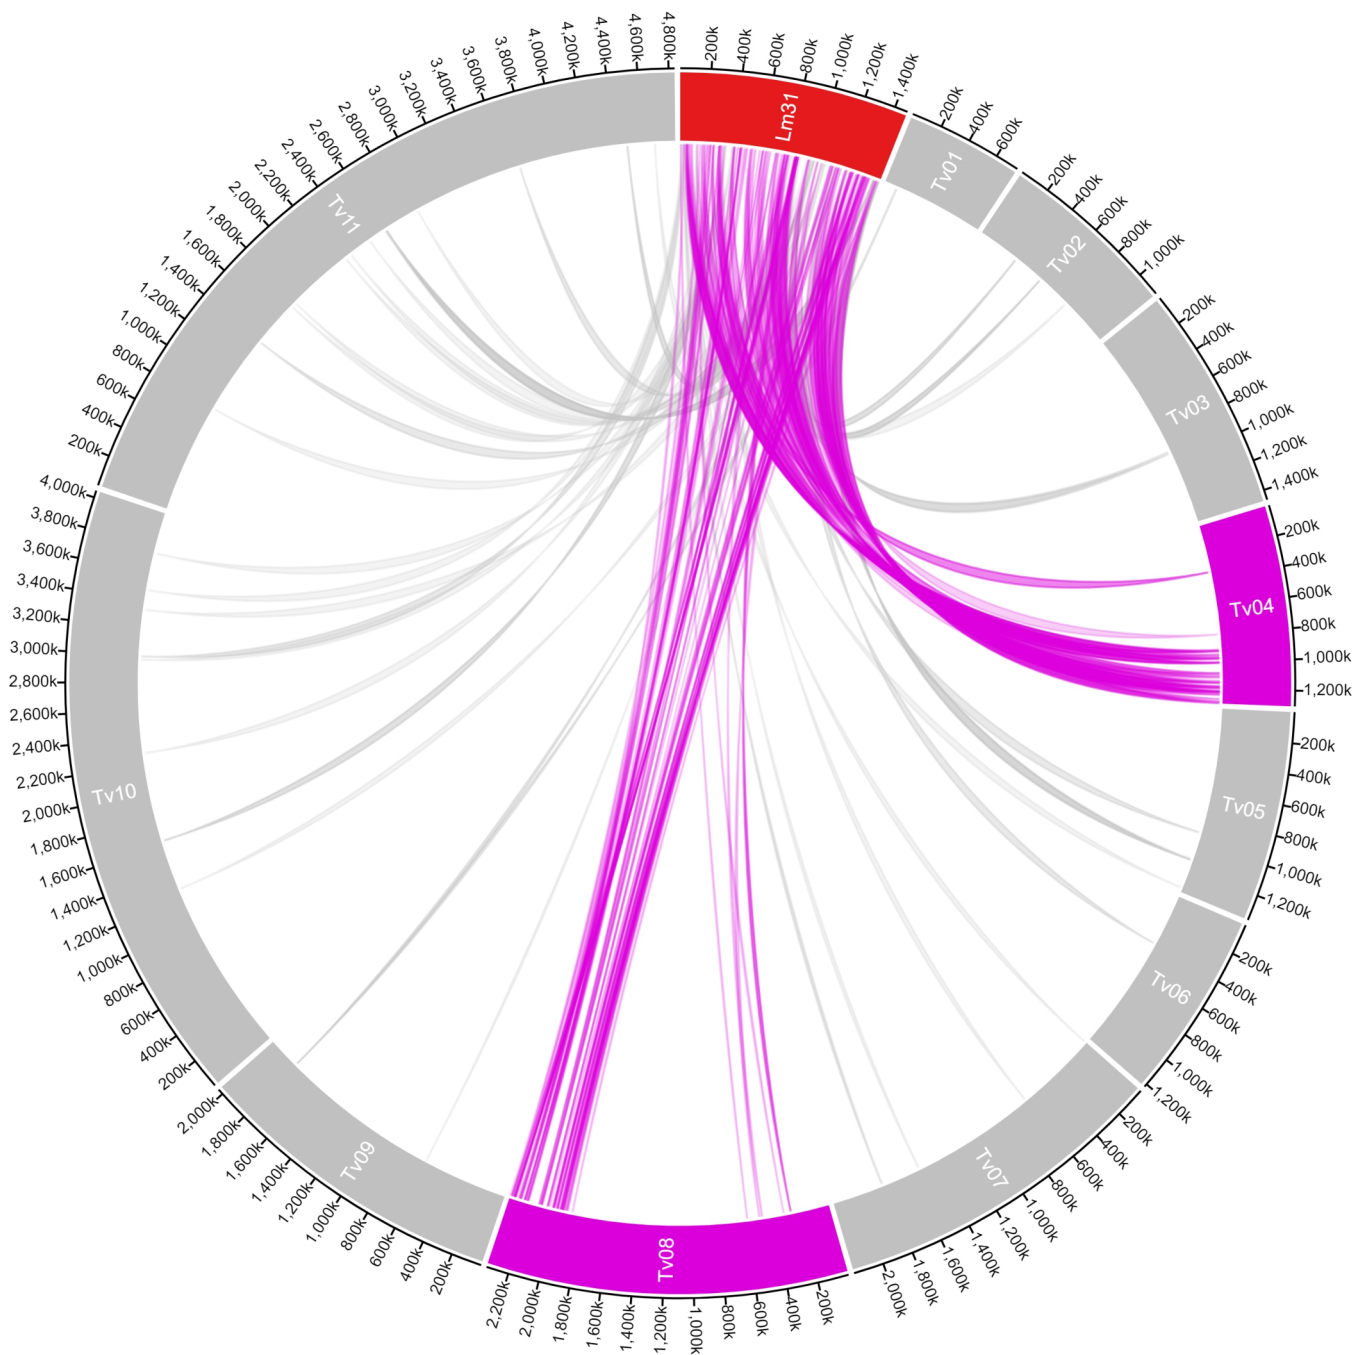

Supplement: Supplemental_Fig_S4.pdf [file Supplemental_Fig_S4.pdf]
