# Supplementary material for: Ancestral aneuploidy and stable chromosomal duplication resulting in differential genome structure and gene expression control in trypanosomatid parasites
Source: PubMed Central journal article supplement (PMC11067883; doi:10.1101/gr.278550.123), 2024-03

**Supplemental\_Fig\_S5.pdf: Gene disposition and orientation in Trypanosomatids chrs.** For each cade, chromosomes are drawn in scale. Genes are represented by black boxes and their orientation by the presence above (plus strand) or below (minus strand) of the chromosomal line.

## *C. bombi*

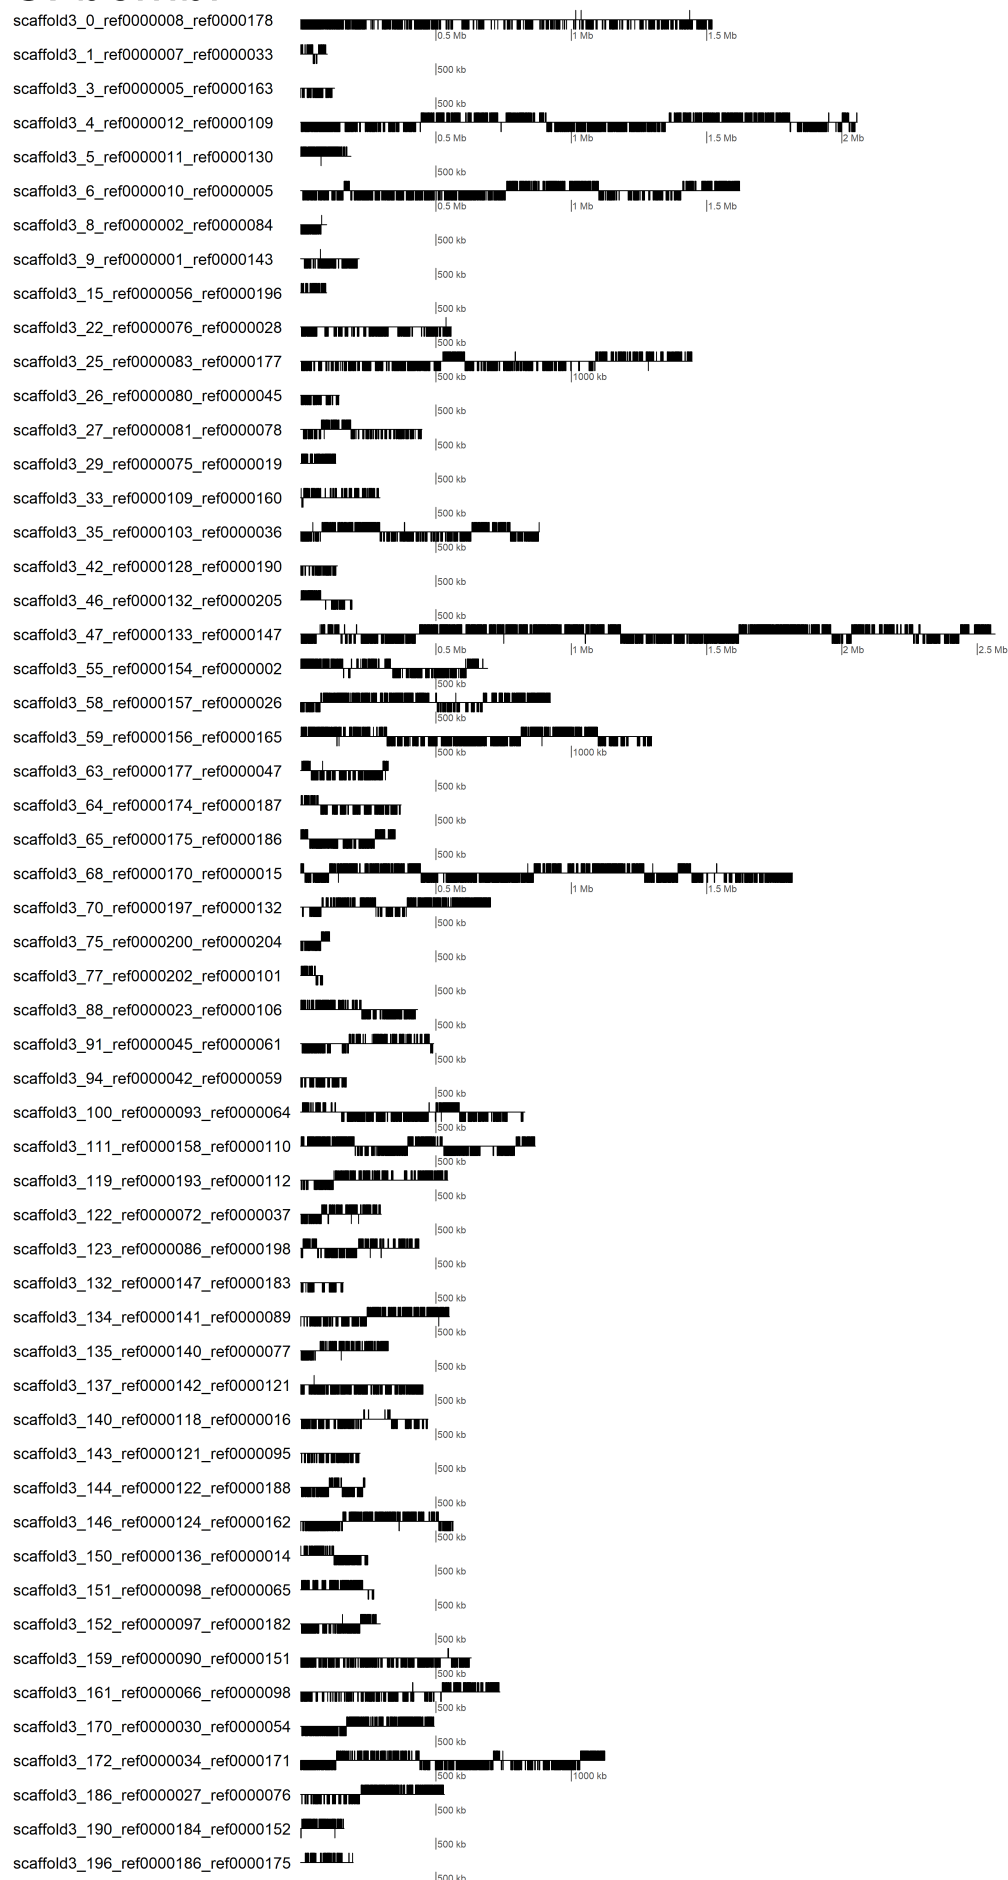

# *C. fasciculata*

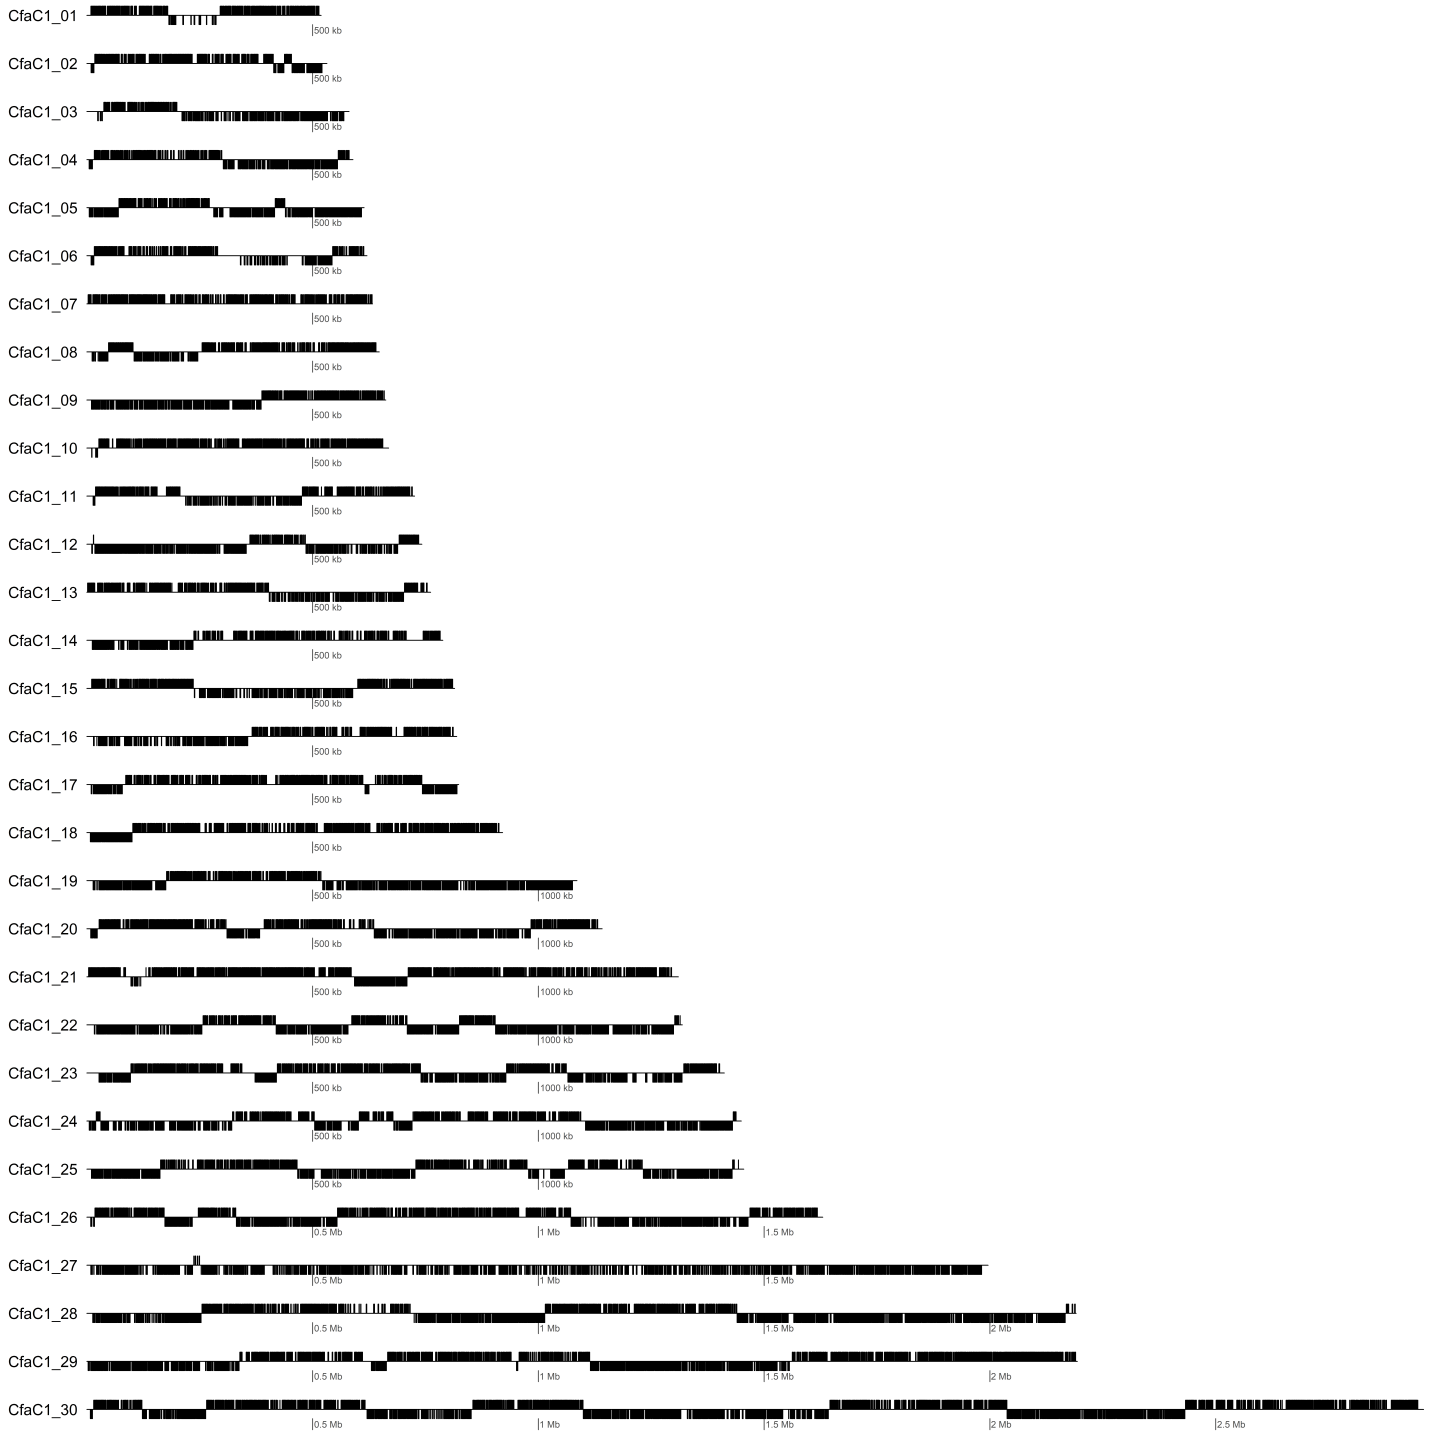

# Endotrypanum

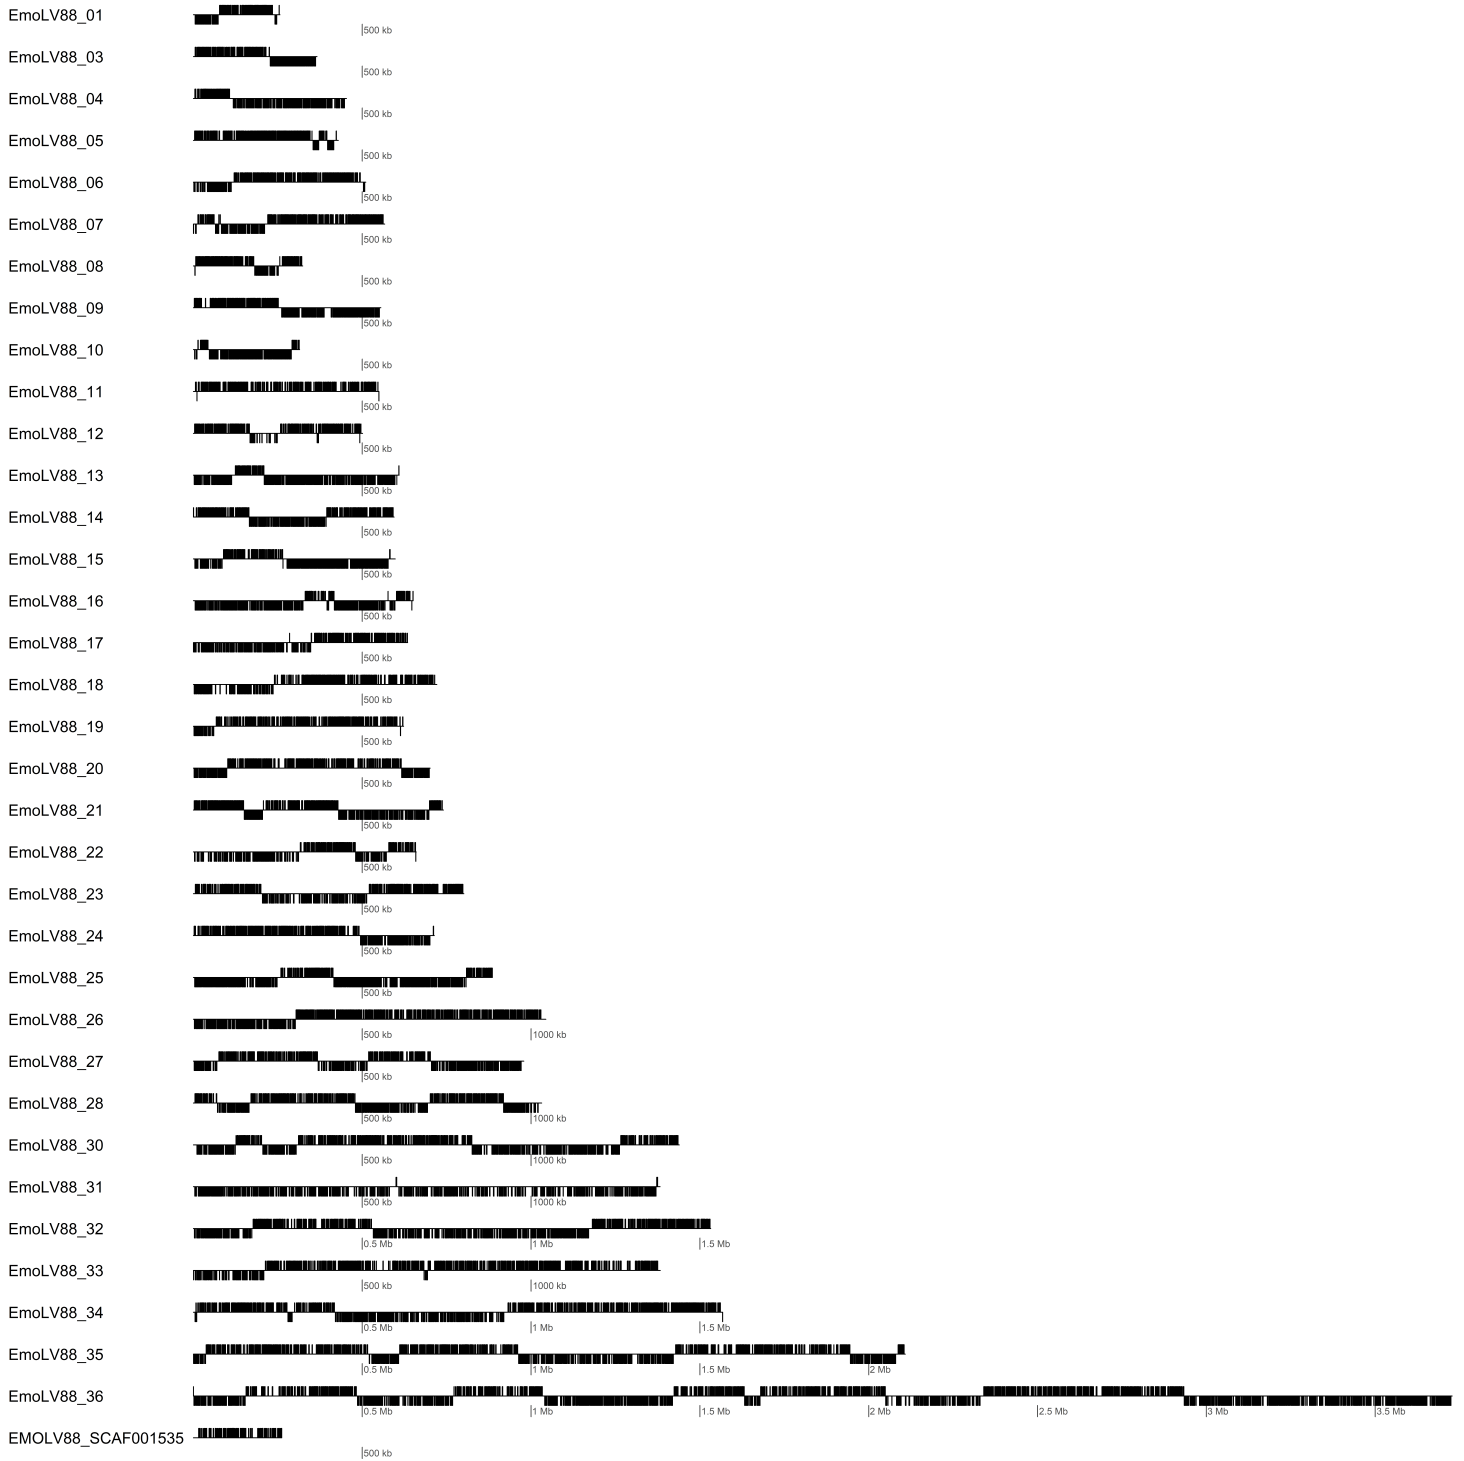

# *L. donovani*

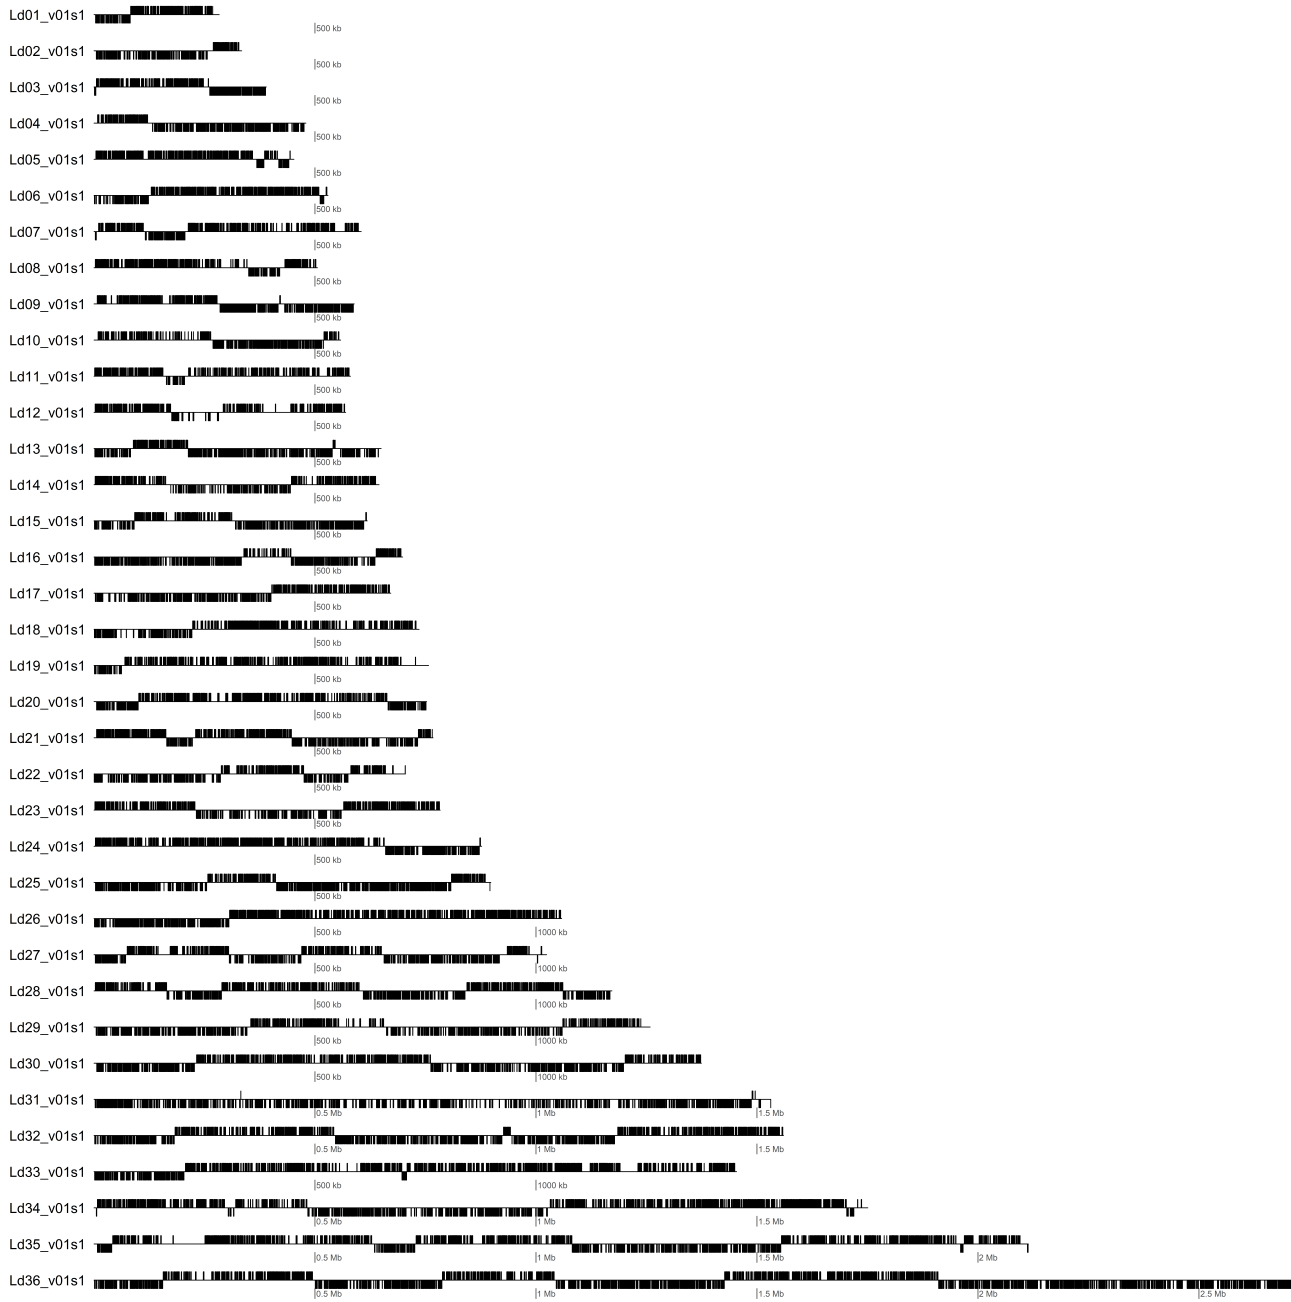



# *L. major*

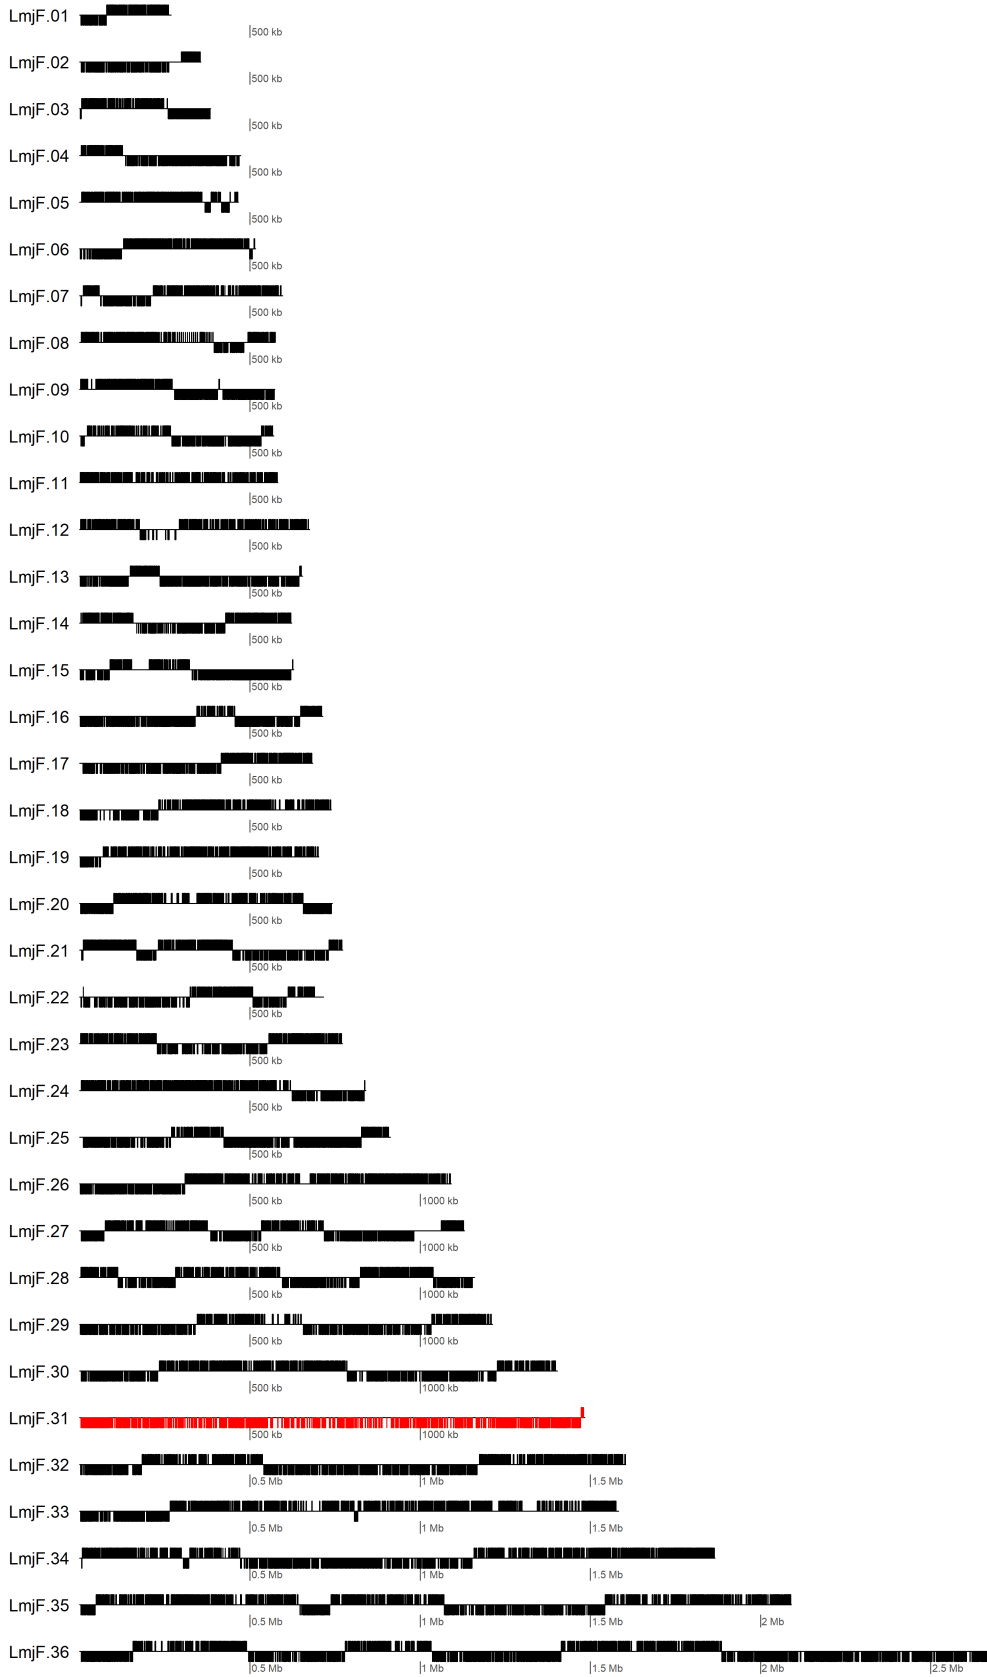

# Leptomonas

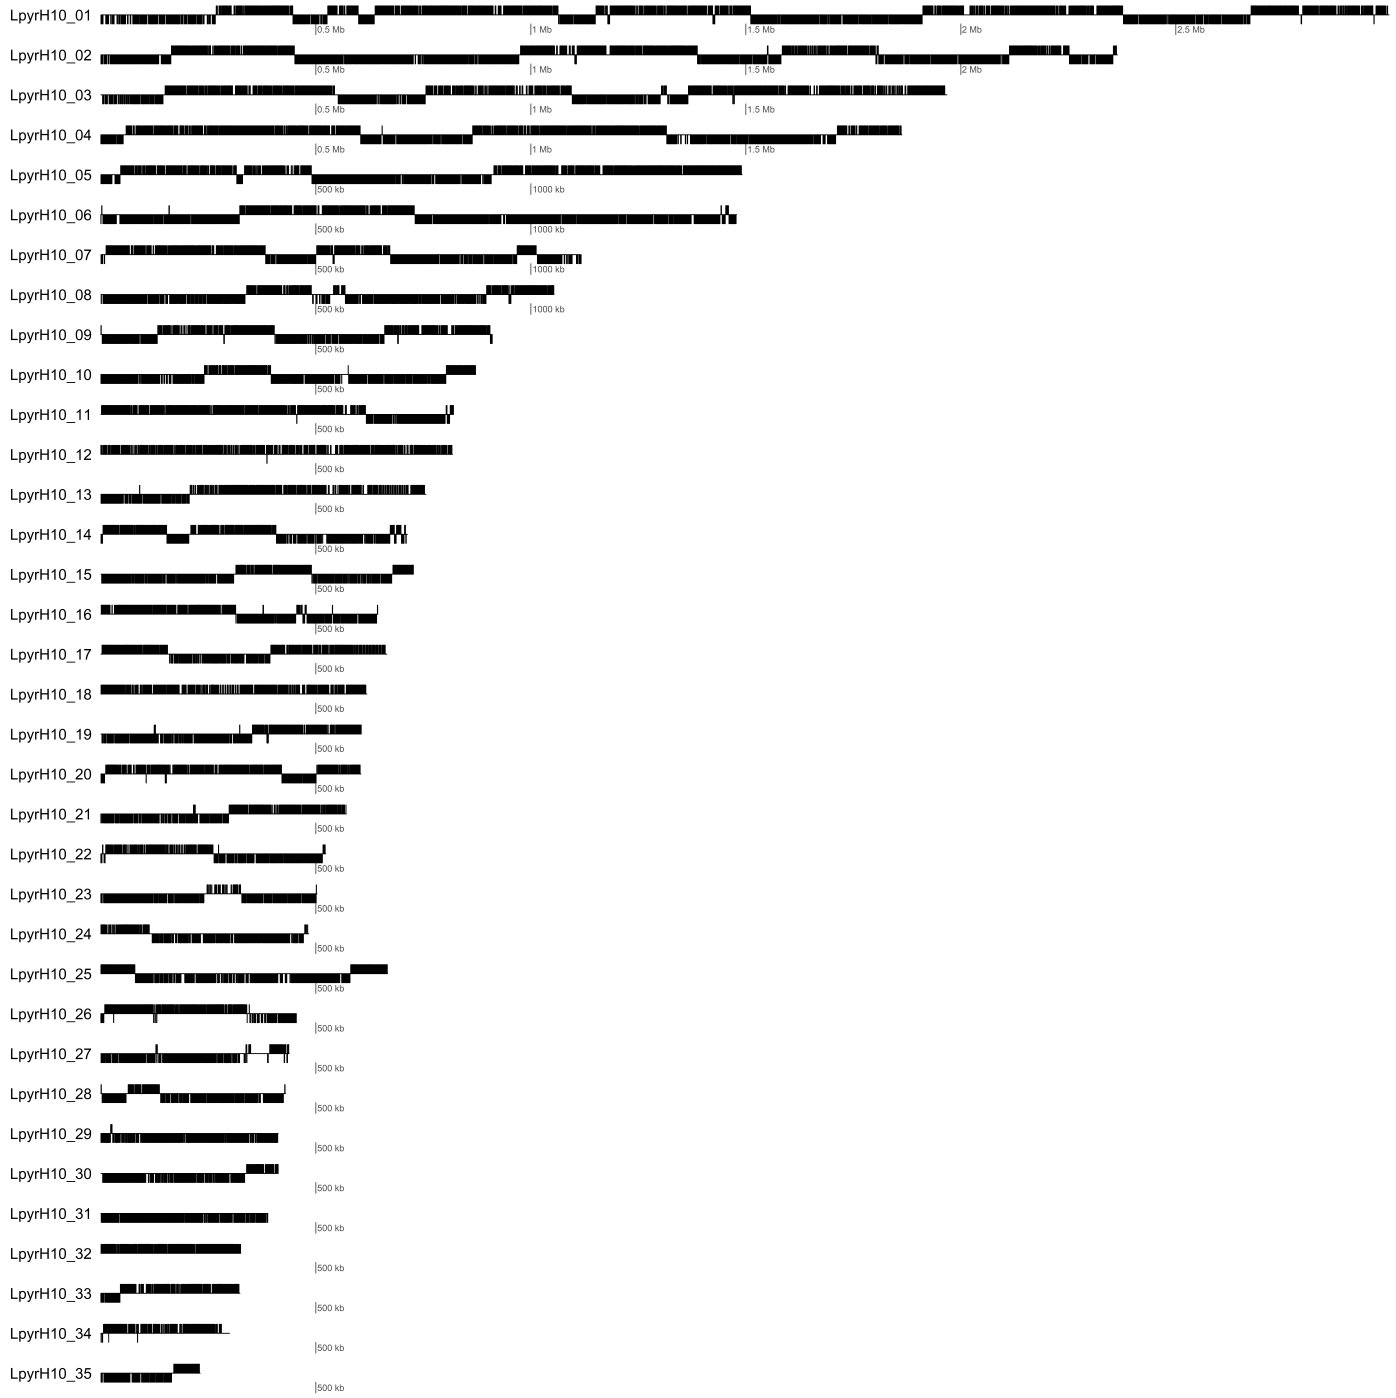

# *P. confusum*

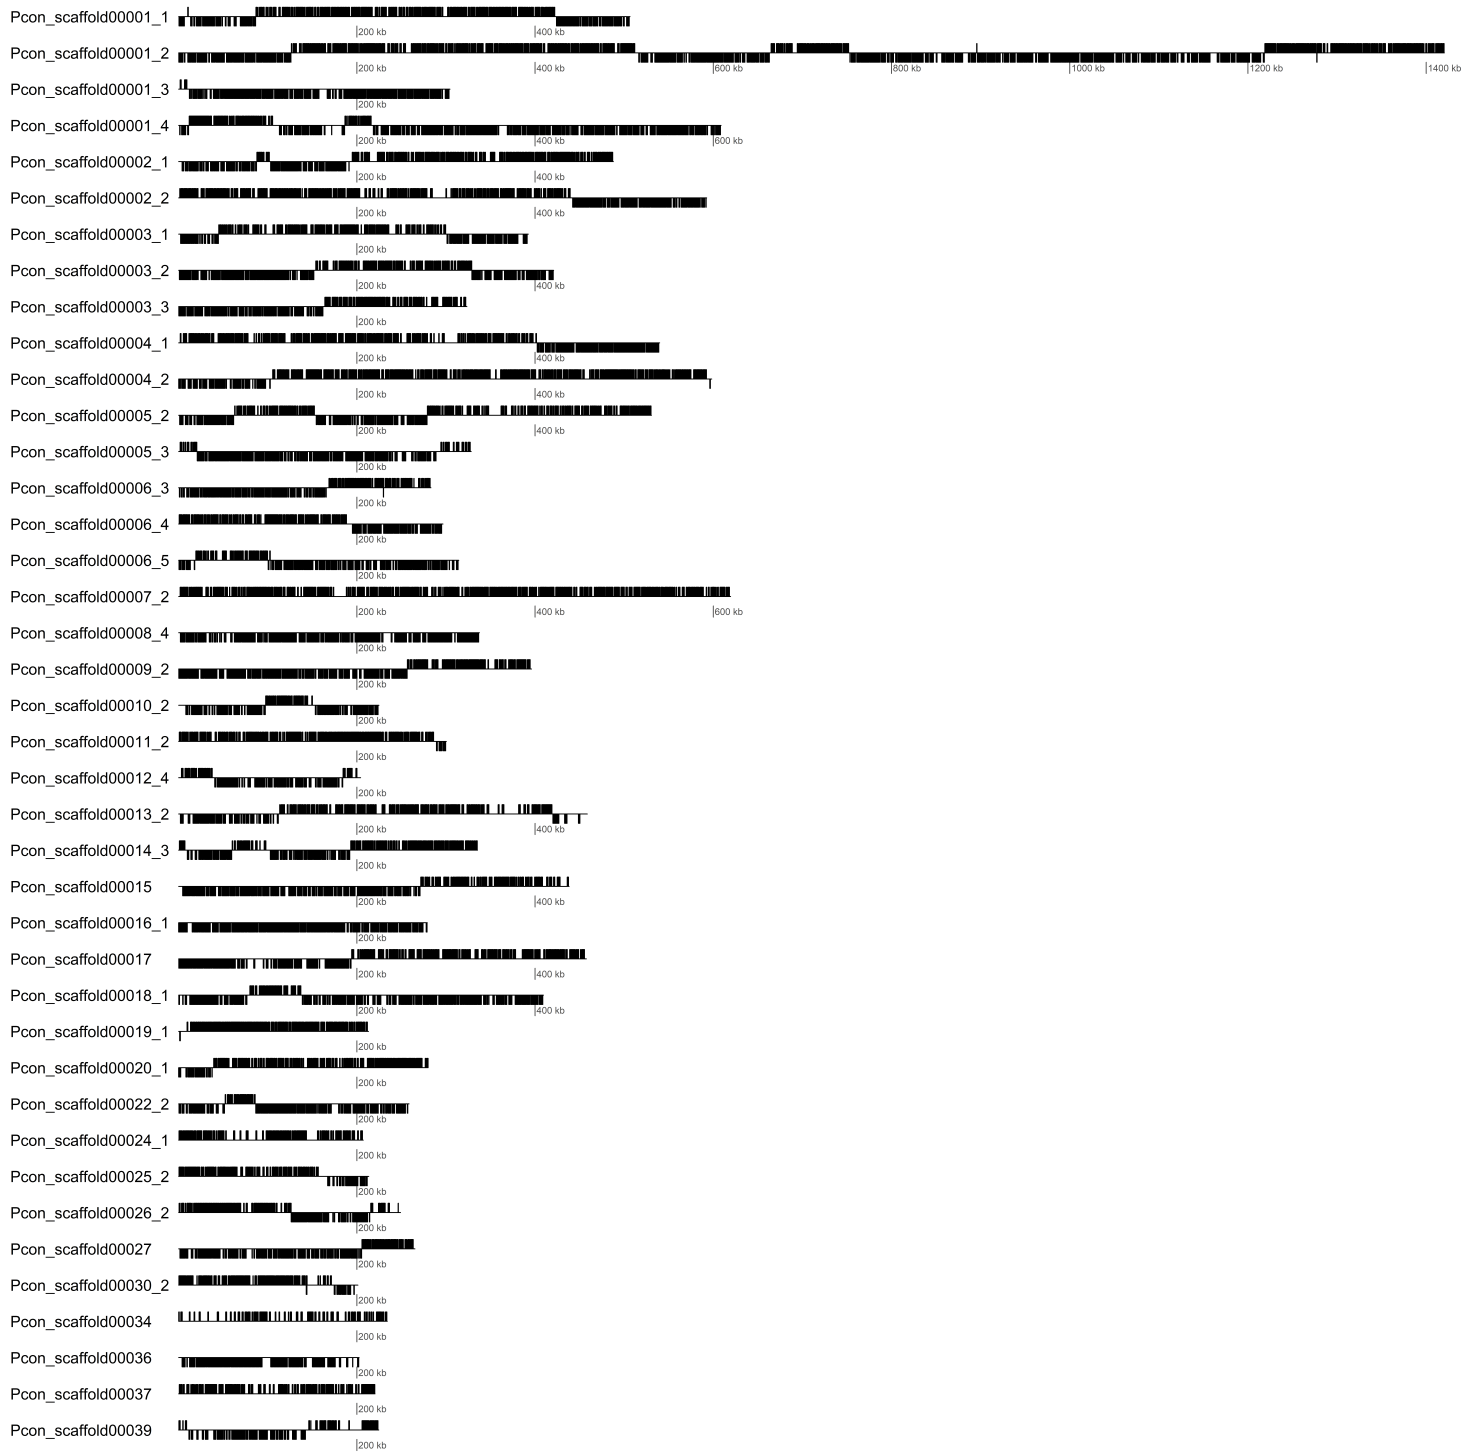

# Porcisia

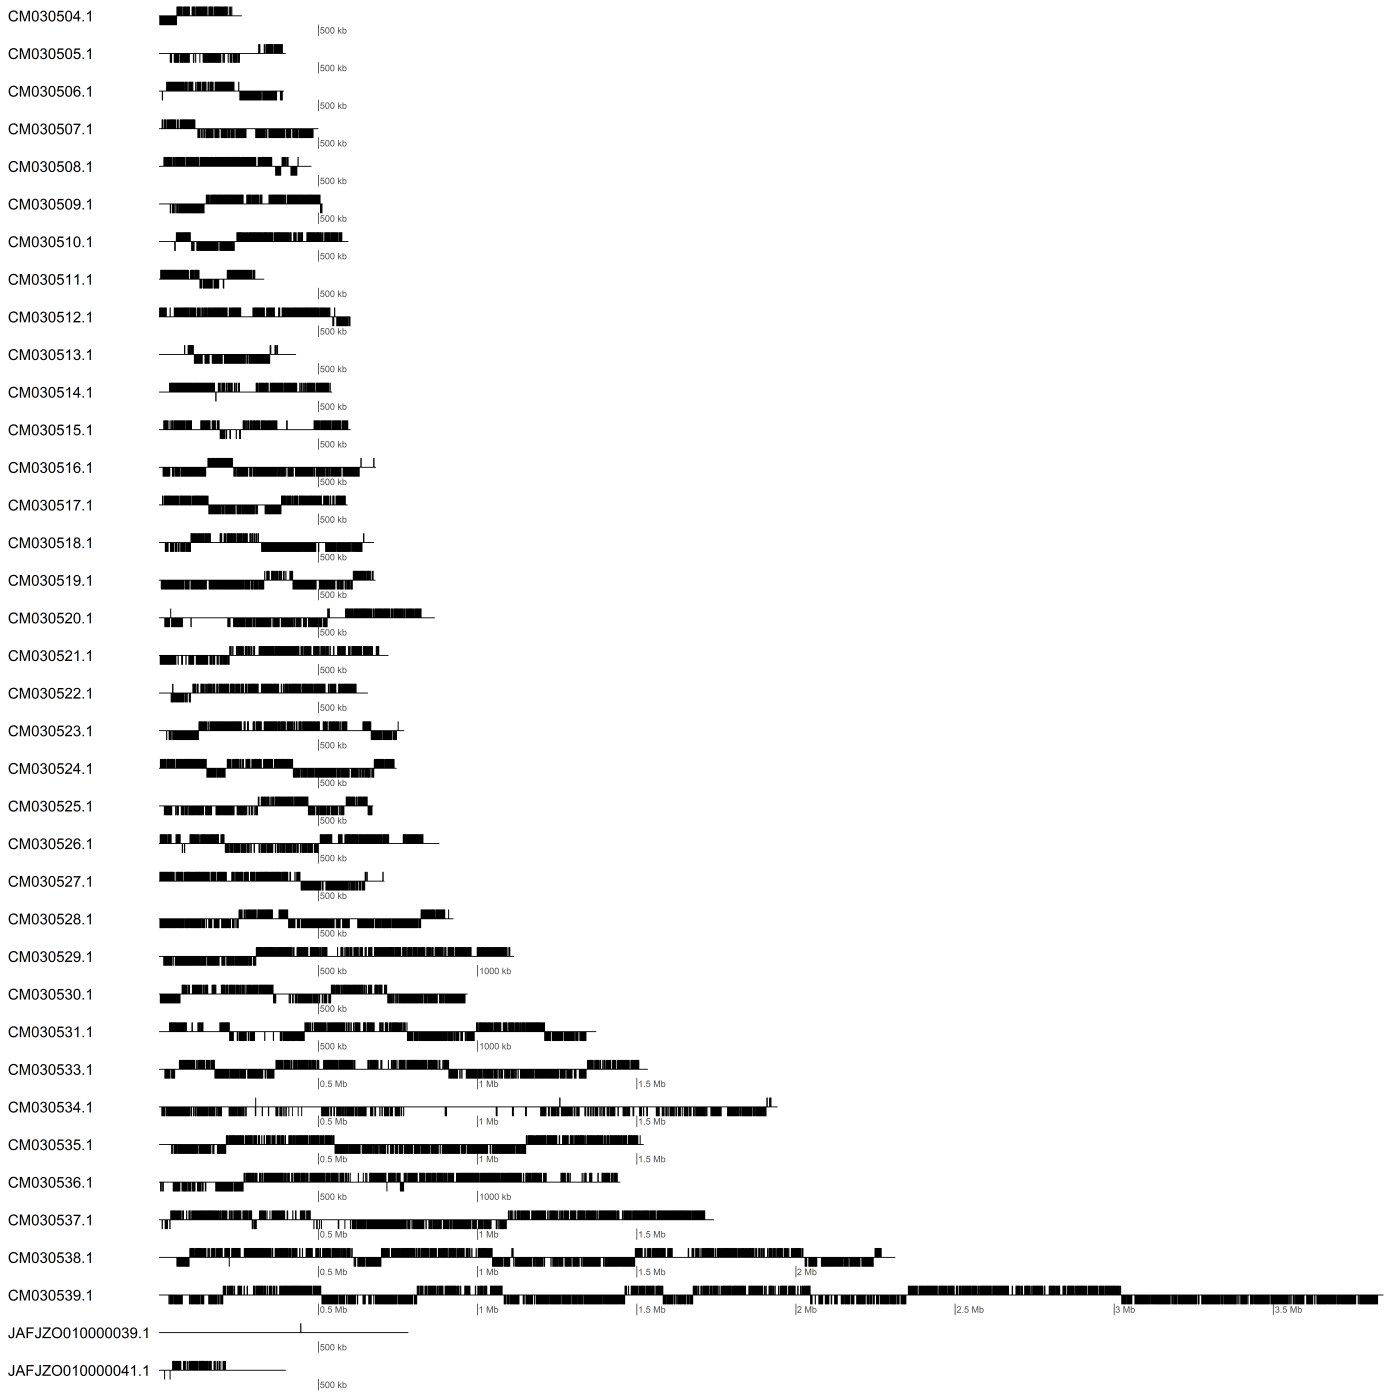

# *T. cruzi*

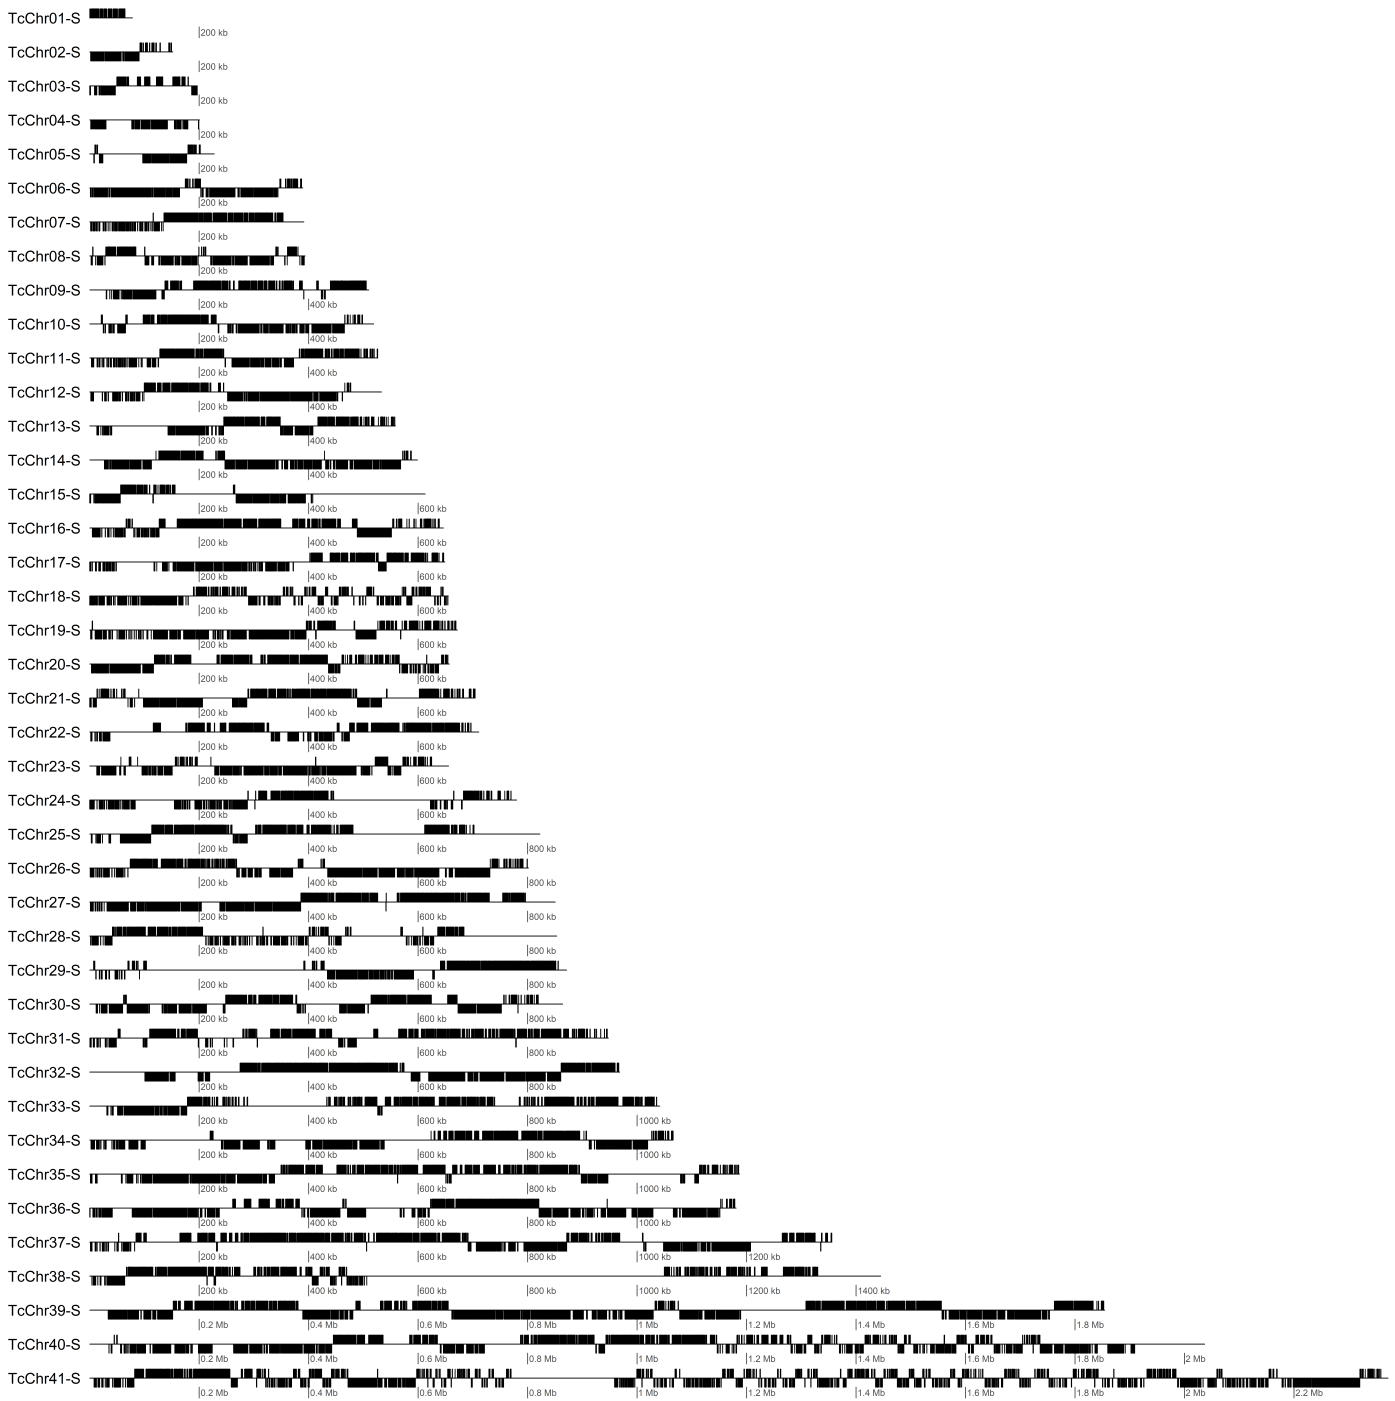

Supplement: Supplemental_Fig_S5.pdf [file Supplemental_Fig_S5.pdf]
