# Supplementary material for: Ancestral aneuploidy and stable chromosomal duplication resulting in differential genome structure and gene expression control in trypanosomatid parasites
Source: PubMed Central journal article supplement (PMC11067883; doi:10.1101/gr.278550.123), 2024-03

**Supplemental\_Fig\_S7.pdf: TASC have an increased nucleotide diversity that is consistent along the chromosome.** Top panels correspond to box plots representing 10kb window  $\pi$  values comparing TASC with other chromosomes. Left: TASC compared to all other chromosomes. Right:  $\pi$  in each chromosome individually. The dashed red line corresponds to the mean  $\pi$  in all chromosomes. Bottom panel(s) represents the  $\pi$  along the chromosome/scaffolds from TASC, where the line represents the 10kb window  $\pi$ , while the dots correspond to the  $\pi$  value in each gene in this chromosome/scaffold. The red dashed line represents the mean  $\pi$  in all chromosomes. **A) *L. donovani* EA\_HIV set; B) *C. bombi*; C) *Leptomonas*.**

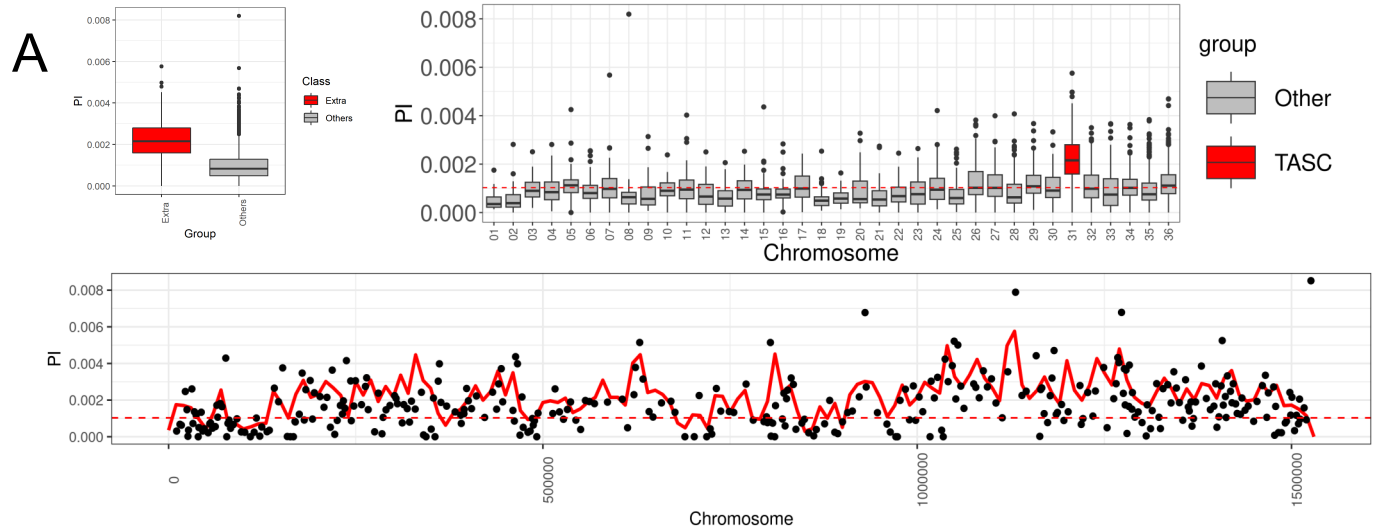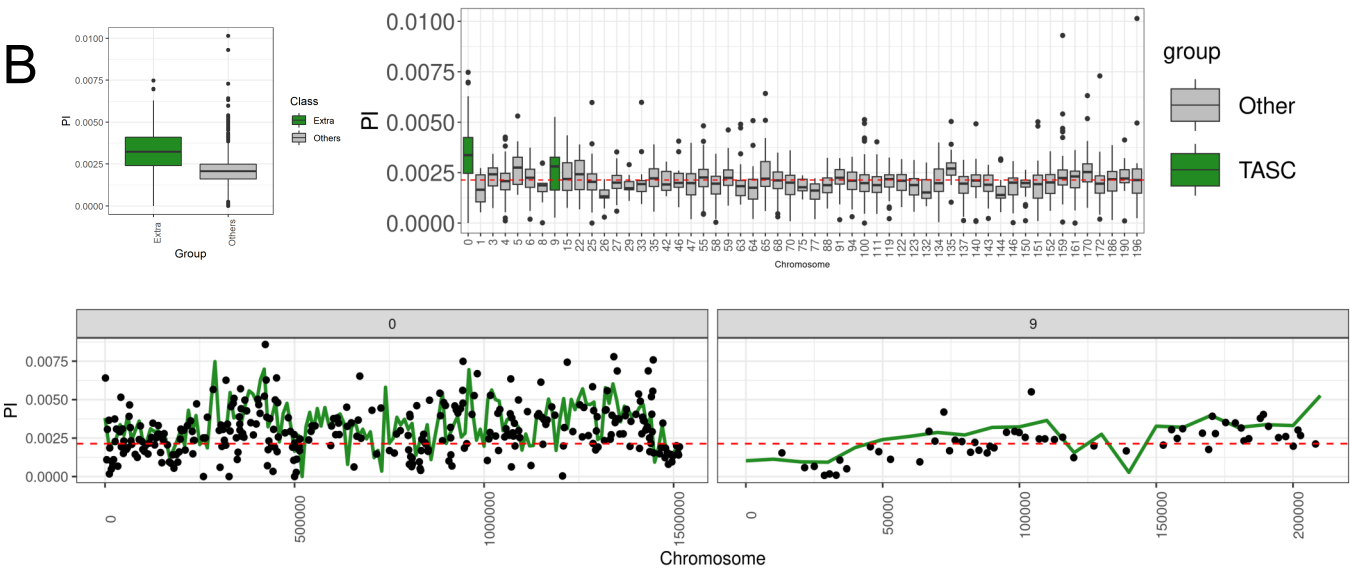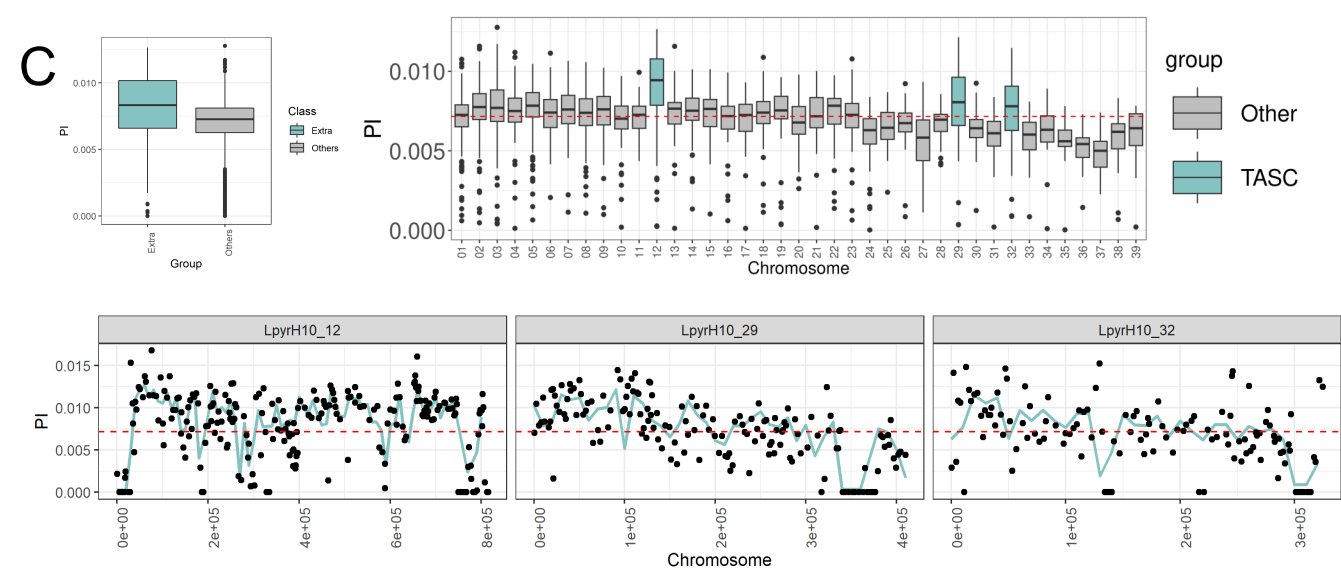

Supplement: Supplemental_Fig_S7.pdf [file Supplemental_Fig_S7.pdf]
