# Supplementary material for: Ancestral aneuploidy and stable chromosomal duplication resulting in differential genome structure and gene expression control in trypanosomatid parasites
Source: PubMed Central journal article supplement (PMC11067883; doi:10.1101/gr.278550.123), 2024-03
Supplement: Supplemental_Fig_S8.pdf [file Supplemental_Fig_S8.pdf]

**Supplemental\_Fig\_8.pdf: High-impactful stop-codon gain in protein code genes and stop-codon loss in TASC were not informative: LdBPK.31.2.001630** pseudogene had an Alternate Allele Frequency (AF) equal to 1 in the evaluated isolates, meaning that all the isolates had the alternate allele. This suggests that this might be an error in the genome assembly or a specific alteration in the strain that was assembled, rather than a population variation. **LdLV9.31.2.207820** pseudogene has AF=0.21, however, it also has multiple internal stop codons, including stop codons upstream and downstream from the 1019617 coordinate. Hence, its biological impact was also low. **LdBPK.31.2.002230**: the mutation had a low AF (0.0132743) corresponding to only 3 heterozygous samples. It has 1257 amino acids, and the stop codon was in the position 1256, probably resulting in low biological impact. **LdBPK.31.2.002730**: the AF was even lower (AF=0.00442478) which corresponds to only one heterozygous sample. Even though this mutation has the chance of being impactful as it occurred in the aminoacid 18 in a 577 amino acids long protein, it was only observed in one sample, which hampers strong population-wise conclusions.

| Chromosome | Pos     | Ref | Alt | Class       | Impact | Gene                         |
|------------|---------|-----|-----|-------------|--------|------------------------------|
| 31         | 362177  | G   | C   | stop_gained | HIGH   | LdBPK.31.2.000945:pseudogene |
| 31         | 362305  | C   | T   | stop_gained | HIGH   | LdBPK.31.2.000945:pseudogene |
| 31         | 808236  | T   | G   | stop_lost   | HIGH   | LdBPK.31.2.001630:pseudogene |
| 31         | 1019617 | A   | G   | stop_lost   | HIGH   | LdLV9.31.2.207820:pseudogene |
| 31         | 1105177 | G   | A   | stop_gained | HIGH   | LdBPK.31.2.002230            |
| 31         | 1183819 | C   | T   | stop_gained | HIGH   | LdLV9.31.2.207890:pseudogene |
| 31         | 1336350 | G   | A   | stop_gained | HIGH   | LdBPK.31.2.002730            |
