# Supplementary material for: Ancestral aneuploidy and stable chromosomal duplication resulting in differential genome structure and gene expression control in trypanosomatid parasites
Source: PubMed Central journal article supplement (PMC11067883; doi:10.1101/gr.278550.123), 2024-03

**Supplemental\_Fig\_S9.pdf: Correlation between CCNV and gene expression. A)** Correlation between the DNA copies (X axis) and RNA expression (Y axis) of all 36 Leishmania chrs in 7 clones ( $r=0.647994$ ,  $p$ -value  $4.14e-27$ ). Leish Chr31 is highlighted in red. This image is a confirmation of the results described in Barja 2017 (Prieto Barja et al. 2017). DNA (red line) and RNA (blue line) AARD along Leish Chr31 in C3 (B); C4 (C); C6 (D); C7(E); C8 (F); C9 (G) and C10 (H).

A

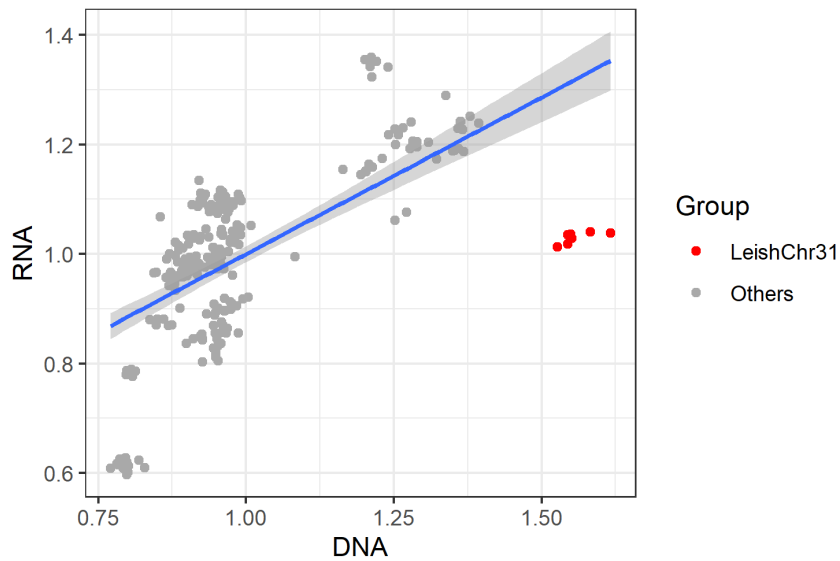

B

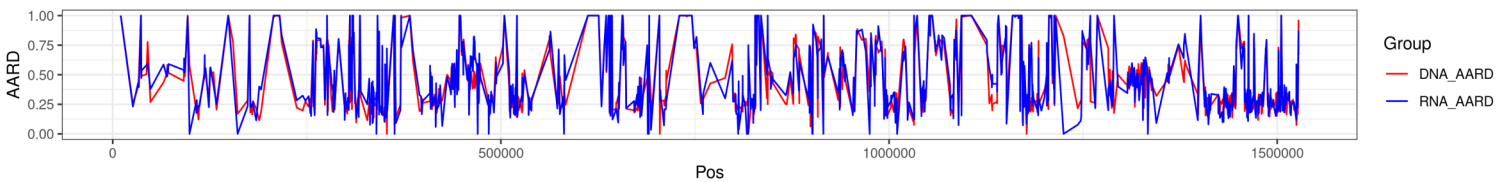

C

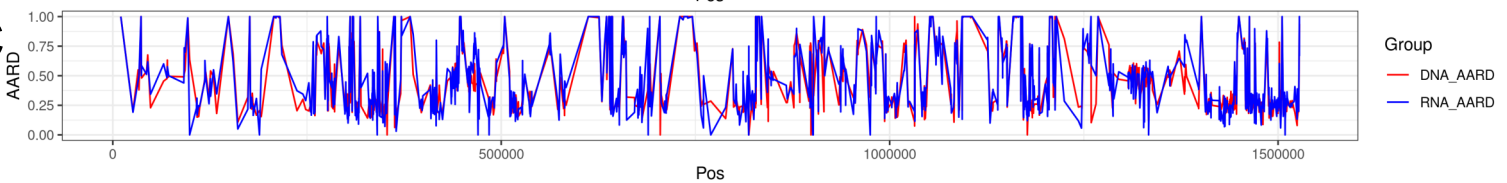

D

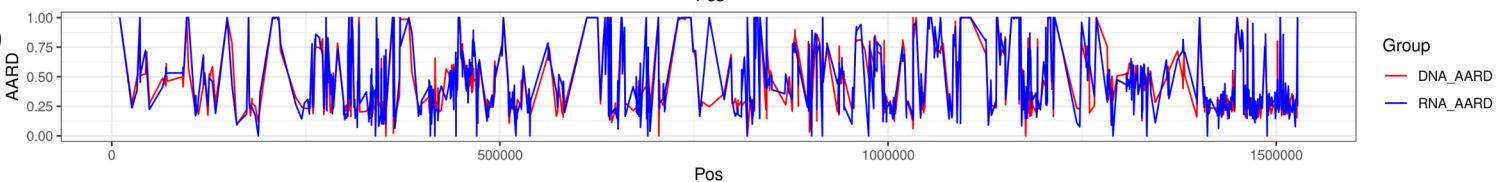

E

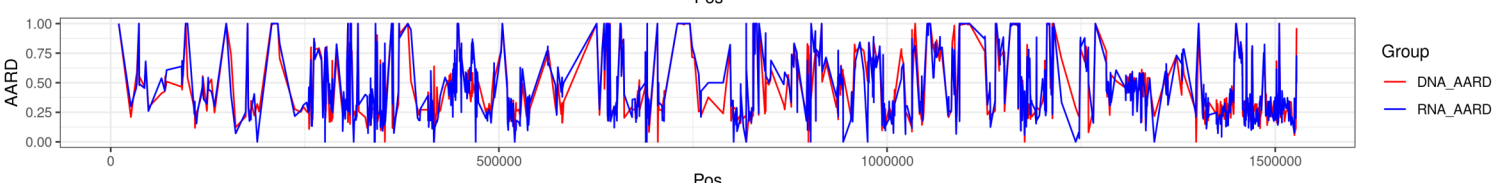

F

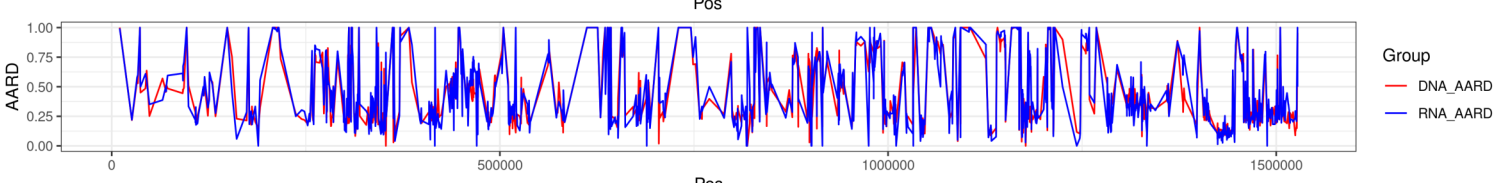

G

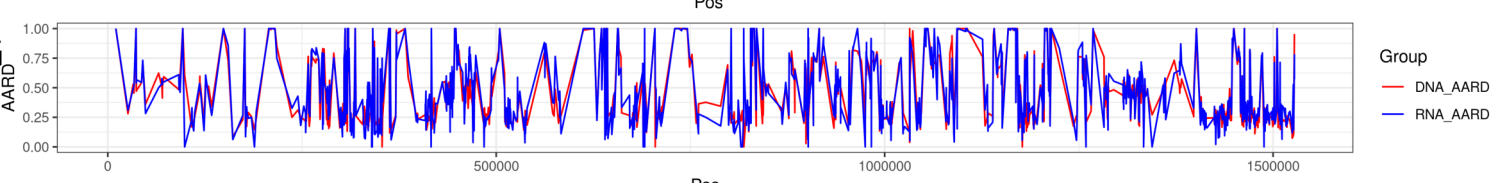

H

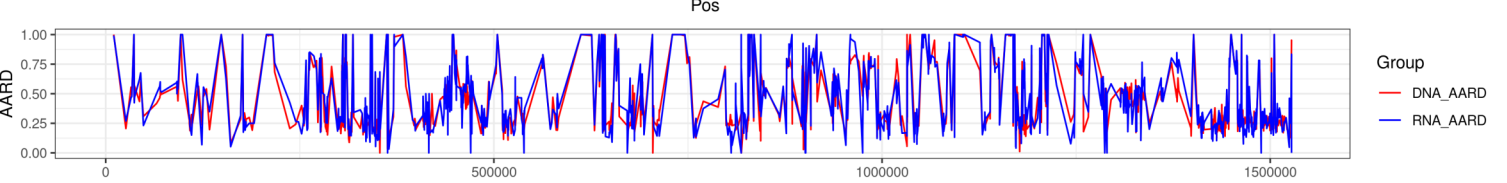

Supplement: Supplemental_Fig_S9.pdf [file Supplemental_Fig_S9.pdf]
