# Supplementary material for: Ancestral aneuploidy and stable chromosomal duplication resulting in differential genome structure and gene expression control in trypanosomatid parasites
Source: PubMed Central journal article supplement (PMC11067883; doi:10.1101/gr.278550.123), 2024-03

**Supplemental\_Fig\_S10.pdf: Codon usage in *L. donovani* genes in each chromosome. Comparison of Measure Independent of Length and Composition (MILC) in Chromosome 31 (red) and all other chromosomes combined (black), represented as **A)** density plots, **B)** boxplot and violin plots. **C)** Comparison of MILC (Y axis) and gene length (X axis), **D)** Log10 MILC in each chromosome. **E)** Heatmap of the codon relative presence in genes from each chromosome.**

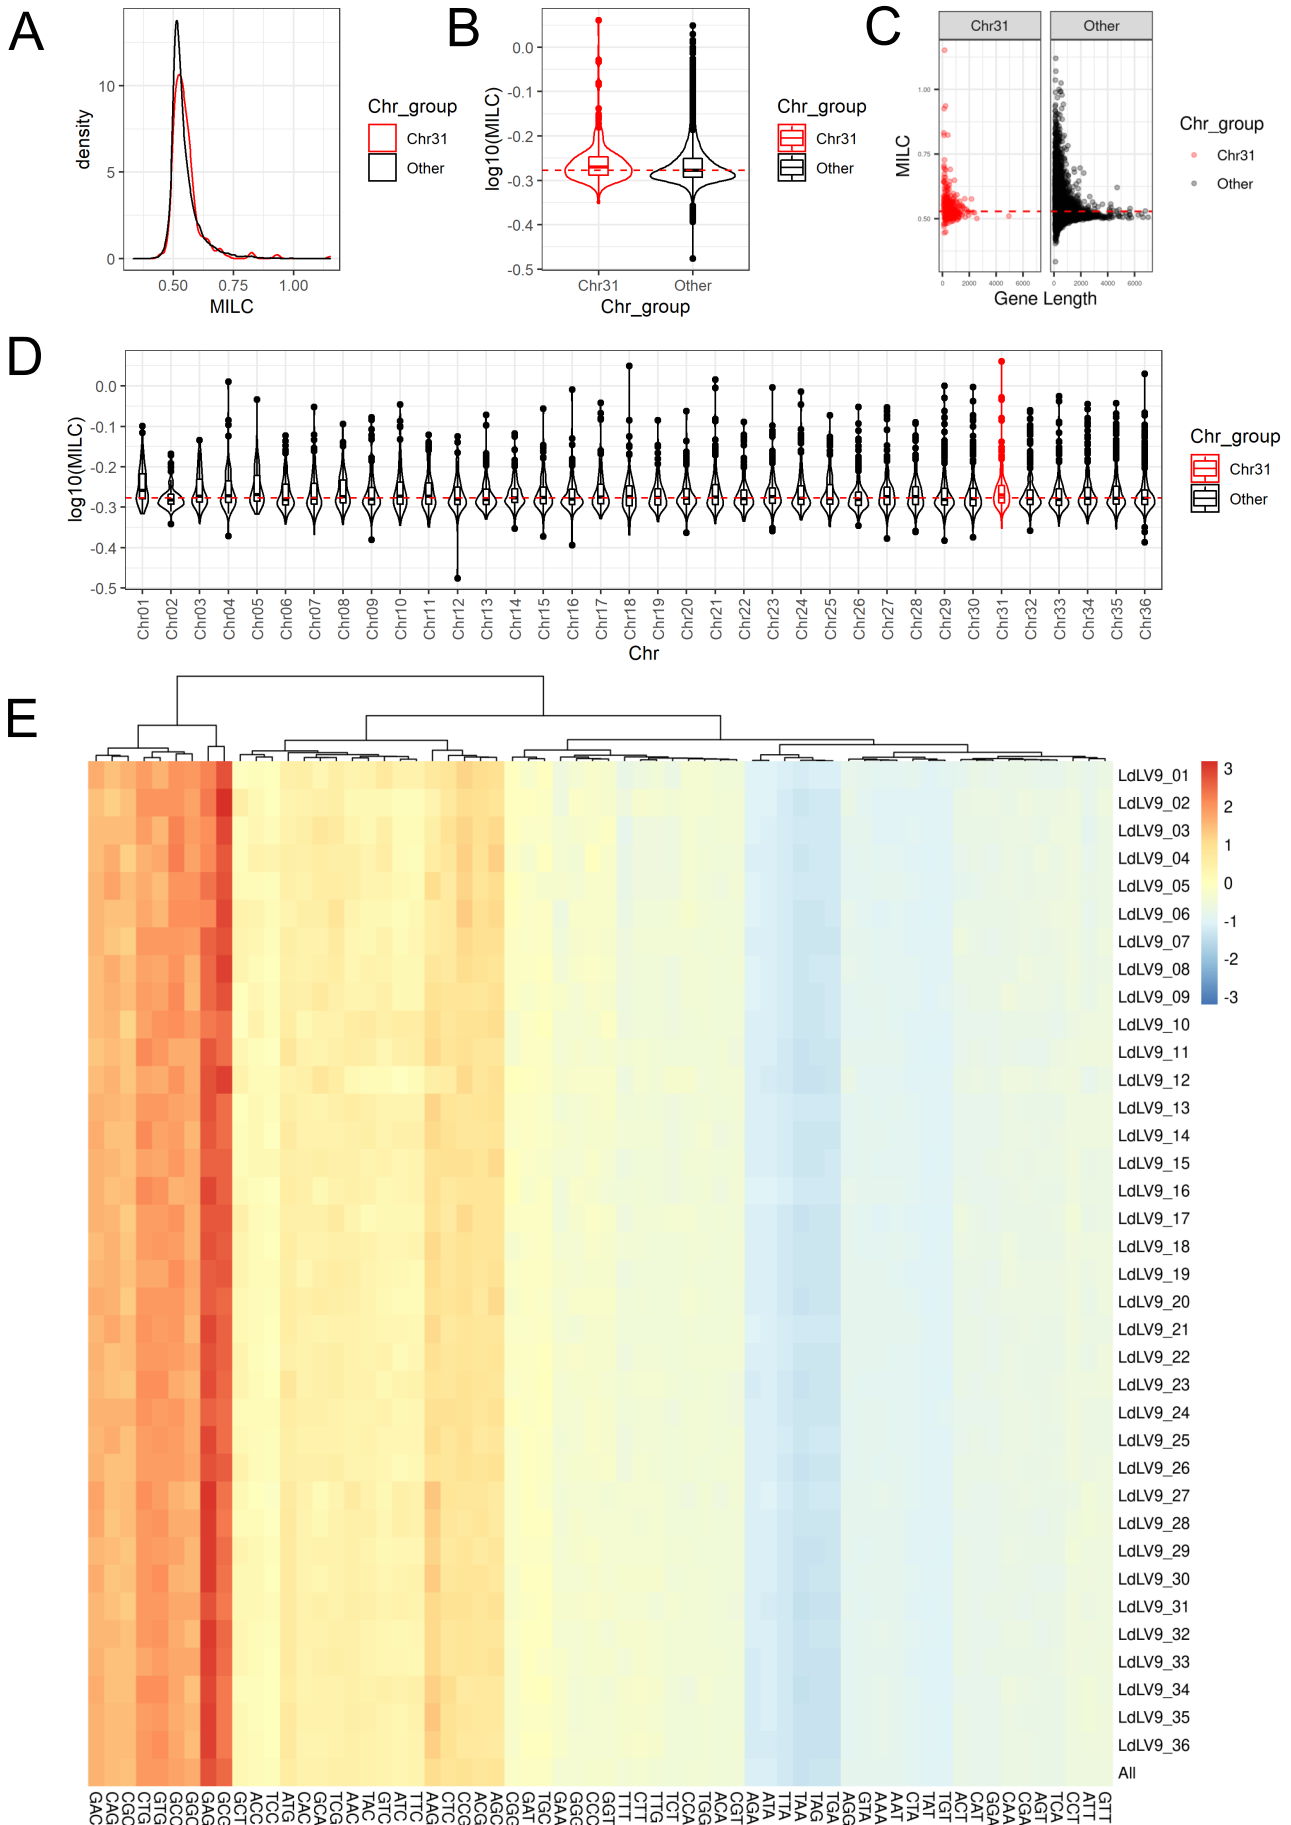

Supplement: Supplemental_Fig_S10.pdf [file Supplemental_Fig_S10.pdf]
