# Supplementary material for: Ancestral aneuploidy and stable chromosomal duplication resulting in differential genome structure and gene expression control in trypanosomatid parasites
Source: HighWire-hosted journal article supplement (doi:10.1101/gr.278550.123), 2024-04-11
Supplement: Supplementary_Methods_.docx [file Supplementary_Methods_.docx]

**Supplementary Methods:**

**WGS read libraries pre processing, mapping and chromosomal somy estimation:**

WGS Read libraries were downloaded from the National Centre for Biotechnology Information (NCBI) Sequence Read Archive (SRA) using Fastq-dump (<https://trace.ncbi.nlm.nih.gov/Traces/sra/sra.cgi?view=software>). The list of samples can be seen in Supplemental_Table_S2.xlsx. Each read library was filtered using fastp v2.10.7 [(Chen et al. 2018)](https://paperpile.com/c/FOuCRm/Bzza5), with the parameters: average Q20, minimal length 50 and removing the read extremities with base quality lower than Q25. Next, for each species/genera the reads were mapped to the reference genome listed in Supplemental_Table_S1.xlsx, using BWA-mem v.0.7.17 [(Li 2013)](https://paperpile.com/c/FOuCRm/Rq2zx), retaining only reads with mapping quality 30 or higher using SAMtools v.1.10 [(Li et al. 2009)](https://paperpile.com/c/FOuCRm/lNB7m). The number of mapped reads was estimated using Samtools Flagstat [(Li et al. 2009)](https://paperpile.com/c/FOuCRm/lNB7m). The chromosomal somy for each sample was estimated using the median read depth coverage of single copy genes in a given chr with non-outlier coverage (Grubb’s tests, with P<0·05), normalised by the genome coverage, estimated by the coverage of all single copy genes in the genome, using Samtools depth [(Li et al. 2009)](https://paperpile.com/c/FOuCRm/lNB7m). The single copy genes were selected using OrthoFinder v. 2.5.4 [(Emms and Kelly 2015, 2019)](https://paperpile.com/c/FOuCRm/R2X15+2cRfX), and the number of genes used in each dataset can be seen in Supplemental_Table_S1.xlsx. Only read libraries with genome coverage equal or greater than 10x were used in posterior analysis. Even though the read libraries were mapped in the full reference assemblies, only chrs/scaffolds larger than 75 kb were used in the Chr Copy Number (CCN) estimations. The heatmaps and dot plots representing the CCNV were generated using R using the libraries heatmap2 (https://cran.r-project.org/web/packages/gplots/index.html) and ggplot2 [(Wickham 2016)](https://paperpile.com/c/FOuCRm/f1K8s).

**Phylogenetic and gene synteny analysis:**

The predicted proteome of the 12 trypanosomatids were filtered to only keep annotated proteins that had more than 100 amino acids. Then, Orthofinder v.2.5.4 [(Emms and Kelly 2015, 2019)](https://paperpile.com/c/FOuCRm/R2X15+2cRfX) was used to identify the 1,547 single copy gene clusters that were present in all evaluated samples and align their sequences using MAFFT v.7.470 [(Katoh and Standley 2013)](https://paperpile.com/c/FOuCRm/ShYdI). Parallel Alignment and back-Translation (ParaAT) [(Zhang et al. 2012)](https://paperpile.com/c/FOuCRm/vXaza) was used to convert the protein alignment in nucleotide alignments, TrimAI [(Capella-Gutiérrez et al. 2009)](https://paperpile.com/c/FOuCRm/72QIT) was used to polish the alignments and remove gap regions, and catfasta2phyml (<https://github.com/nylander/catfasta2phyml>) was used to concatenate the alignment of all genes, resulting in a final alignment containing 1,467,948 positions. Finally, the maximum likelihood phylogeny was estimated using IQ-TREE 2.v2.2.0 [(Minh et al. 2020)](https://paperpile.com/c/FOuCRm/fuJi), with the nucleotide substitution model selected automatically by ModelFinder (GTR+F+I+I+R3, chosen according to BIC) and 1,000 bootstrap replicates. The tree representation was generated in R using ggtree [(Yu et al. 2017)](https://paperpile.com/c/FOuCRm/BuhKw). The colorstrip represents the presence/absence of aneuploidies.

**Nucleotide diversity (π) estimation - SNP calling**

Read groups were assigned for the filtered mapped read libraries, using PicardTools v.2.21.6 AddOrReplaceReadGroups (<https://github.com/broadinstitute/picard>). SNPs and indels were called using the Genome Analysis Toolkit (GATK) v.4.1.0.0 HaplotypeCaller and the discovery genotyping mode of Freebayes v. 1.3.5 (<https://github.com/ekg/freebayes>), with a minimum alternative allele read count of 5. Only SNP/Indel positions that were identified by both callers were kept. For each dataset, the single-sample VCFs were merged with VCFtools v.0.1.16 and regenotyped using Freebayes. Next, the VCF file was filtered using BCFtools v.1.12 [(Danecek et al. 2021)](https://paperpile.com/c/FOuCRm/mgfi7), to select only biallelic SNPs, with call quality above 200, coverage greater than a quarter of the genome coverage, and lower than four times the genome coverage (Cov), with mapping quality 40 or higher and properly paired reads (-m2 -M2 -i ' TYPE="snp" & QUAL > 200 & INFO/DP > Cov/4 & INFO/DP < Cov*4 & INFO/MQM >40 & INFO/MQMR >40 & INFO/PAIRED > 0.9 ).

The Nucleotide diversity (π) was estimated using two approaches: 1-Using 10 kb sliding windows with VCFtools v.0.1.16 --window-pi [(Danecek et al. 2011)](https://paperpile.com/c/FOuCRm/4D7Kt), correcting for reporting windows with “0” SNPs using a custom R script (available in Figshare); 2- Estimating π in each gene using custom R scripts optimised to non-diploid samples (available in Figshare). The comparisons of the π 10 kb in windows in duplicated chrs in each dataset was performed using Kruskal-Wallis and the Dunn’s post-test with Bonferroni correction for multiple tests, implemented in the dunnTest function from the FSA (https://www.rdocumentation.org/packages/FSA/versions/0.9.4) R package. The plots were generated in R.

**Evaluation of gene functions in consistently duplicated chrs**

The evaluation of biological relevant functions in chrs that were consistently with extra copies was performed by manual evaluation of gene annotations and by *Gene Set Enrichment Analysis by ontology* (GESEA). This analysis was performed with the representative well annotated *L. donovani* (BPK282A1), *T. brucei* (TREU927) and *T. cruzi* (CL Brener) genomes. The whole genome CDSs from these three strains were downloaded from TriTrypDB v55, translated with SeqKit v.0.12.0 and the ortholog groups between these samples was estimated with OrthoFinder v.2.5.4 [(Emms and Kelly 2015, 2019)](https://paperpile.com/c/FOuCRm/R2X15+2cRfX). The GESEA analysis was performed using the TopGO package, using the elim-fisher and multiple-test correction by Benjamini-Hochberg, with GO Annotation Files (GAF) downloaded from TriTrypDB v55. Three comparisons were made: **1-Shared in all species:** Genes in orthogroups with members from *L. donovani* Chr31, *T. cruzi* Chr31 and in the interval 1.0 to 1.5 Mb in *T. brucei* chr4 and 2.0 to 2.5 Mb chr8 compared with all genes in the three species (All TriTryps). In this comparison only GOs with at least three annotated genes in the test set were evaluated; **2-Shared between two species:** Genes that were present in these chrs only in two species compared with all genes (sets: Leishmania_Tbrucei, Leishmania_Tcruzi, Tbrucei_Tcruzi). In this comparison, only GOs with at least two annotated genes in the test set were evaluated; **3-Exclusive genes:** Genes from the aforementioned chrs that are exclusive for each species (*Leishmania*, *T. brucei*, *T. cruzi*).

**References:**

[Capella-Gutiérrez S, Silla-Martínez JM, Gabaldón T. 2009. trimAl: a tool for automated alignment trimming in large-scale phylogenetic analyses. *Bioinformatics* **25**: 1972–1973.](http://paperpile.com/b/FOuCRm/72QIT)

[Chen S, Zhou Y, Chen Y, Gu J. 2018. fastp: an ultra-fast all-in-one FASTQ preprocessor. *Bioinformatics* **34**: i884–i890.](http://paperpile.com/b/FOuCRm/Bzza5)

[Danecek P, Auton A, Abecasis G, Albers CA, Banks E, DePristo MA, Handsaker RE, Lunter G, Marth GT, Sherry ST, et al. 2011. The variant call format and VCFtools. *Bioinformatics* **27**: 2156–2158.](http://paperpile.com/b/FOuCRm/4D7Kt)

[Danecek P, Bonfield JK, Liddle J, Marshall J, Ohan V, Pollard MO, Whitwham A, Keane T, McCarthy SA, Davies RM, et al. 2021. Twelve years of SAMtools and BCFtools. *Gigascience* **10**.](http://paperpile.com/b/FOuCRm/mgfi7) <http://dx.doi.org/10.1093/gigascience/giab008>[.](http://paperpile.com/b/FOuCRm/mgfi7)

[Emms DM, Kelly S. 2019. OrthoFinder: phylogenetic orthology inference for comparative genomics. *Genome Biol* **20**: 238.](http://paperpile.com/b/FOuCRm/2cRfX)

[Emms DM, Kelly S. 2015. OrthoFinder: solving fundamental biases in whole genome comparisons dramatically improves orthogroup inference accuracy. *Genome Biol* **16**: 157.](http://paperpile.com/b/FOuCRm/R2X15)

[Katoh K, Standley DM. 2013. MAFFT multiple sequence alignment software version 7: improvements in performance and usability. *Mol Biol Evol* **30**: 772–780.](http://paperpile.com/b/FOuCRm/ShYdI)

[Li H. 2013. Aligning sequence reads, clone sequences and assembly contigs with BWA-MEM. *arXiv [q-bioGN]*.](http://paperpile.com/b/FOuCRm/Rq2zx) <http://arxiv.org/abs/1303.3997>[.](http://paperpile.com/b/FOuCRm/Rq2zx)

[Li H, Handsaker B, Wysoker A, Fennell T, Ruan J, Homer N, Marth G, Abecasis G, Durbin R, 1000 Genome Project Data Processing Subgroup. 2009. The Sequence Alignment/Map format and SAMtools. *Bioinformatics* **25**: 2078–2079.](http://paperpile.com/b/FOuCRm/lNB7m)

[Minh BQ, Schmidt HA, Chernomor O, Schrempf D, Woodhams MD, von Haeseler A, Lanfear R. 2020. IQ-TREE 2: New Models and Efficient Methods for Phylogenetic Inference in the Genomic Era. *Mol Biol Evol* **37**: 1530–1534.](http://paperpile.com/b/FOuCRm/fuJi)

[Prieto Barja P, Pescher P, Bussotti G, Dumetz F, Imamura H, Kedra D, Domagalska M, Chaumeau V, Himmelbauer H, Pages M, et al. 2017. Haplotype selection as an adaptive mechanism in the protozoan pathogen Leishmania donovani. *Nat Ecol Evol* **1**: 1961–1969.](http://paperpile.com/b/FOuCRm/9JO0T)

[Wickham H. 2016. *ggplot2: Elegant Graphics for Data Analysis*. Springer.](http://paperpile.com/b/FOuCRm/f1K8s)

[Yu G, Smith DK, Zhu H, Guan Y, Lam TT-Y. 2017. Ggtree : An r package for visualization and annotation of phylogenetic trees with their covariates and other associated data. *Methods Ecol Evol* **8**: 28–36.](http://paperpile.com/b/FOuCRm/BuhKw)

[Zhang Z, Xiao J, Wu J, Zhang H, Liu G, Wang X, Dai L. 2012. ParaAT: a parallel tool for constructing multiple protein-coding DNA alignments. *Biochem Biophys Res Commun* **419**: 779–781.](http://paperpile.com/b/FOuCRm/vXaza)
